# Supplementary material
Source: PubMed Central journal article supplement (PMC5321507)
Supplement: NIHMS68613-supplement-Supporting_Information.pdf [file NIHMS68613-supplement-Supporting_Information.pdf]

# Catalytic Transfer of Magnetism using a Neutral Iridium Phenoxide Complex

Amy J. Ruddlesden,<sup>a</sup> Ryan E. Mewis,<sup>a</sup> Gary G. R. Green,<sup>b</sup> Adrian C. Whitwood<sup>a</sup> and Simon B. Duckett.\*<sup>a</sup>

**AUTHOR ADDRESS** <sup>a</sup> Department of Chemistry, University of York, Heslington, YO10 5DD; Tel: 01904 322564; E-mail: simon.duckett@york.ac.uk, <sup>b</sup> York Neuroimaging Centre, The BiocentreYork, Science Park, Heslington, York, YO10 5NY.

Supplementary information

## Contents

|                                                                                                                                                                                                                                                                                                                                                                                                                  |    |
|------------------------------------------------------------------------------------------------------------------------------------------------------------------------------------------------------------------------------------------------------------------------------------------------------------------------------------------------------------------------------------------------------------------|----|
| 1. General experimental .....                                                                                                                                                                                                                                                                                                                                                                                    | 3  |
| 2. Synthesis details of the synthesis of 1-(2,4,6-trimethylphenyl)-1H-imidazole, 3-(2-methylene-4-nitrophenol)-1-(2,4,6-trimethylphenyl) imidazolium bromide (L <sub>1</sub> HBr), silver(II) 3-(2-methylene-4-nitrophenolate)-1-(2,4,6-trimethylphenyl)imidazolylidene (AgL <sub>1</sub> ) and iridium(I) (3-(2-methylene-4-nitrophenolate)-1-(2,4,6-trimethylphenyl)imidazolylidene)(cyclooctadiene) (1) ..... | 4  |
| Synthesis of 1-(2,4,6-trimethylphenyl)-1H-imidazole <sup>2</sup> .....                                                                                                                                                                                                                                                                                                                                           | 4  |
| Synthesis of 3-(2-methylene-4-nitrophenol)-1-(2,4,6-trimethylphenyl) imidazolium bromide, L <sub>1</sub> HBr <sup>3</sup> .....                                                                                                                                                                                                                                                                                  | 4  |
| Synthesis of silver(II) 3-(2-methylene-4-nitrophenolate)-1-(2,4,6-trimethylphenyl)imidazolylidene, AgL <sub>1</sub> <sup>3</sup> .....                                                                                                                                                                                                                                                                           | 4  |
| Synthesis of iridium(I) (3-(2-methylene-4-nitrophenolate)-1-(2,4,6-trimethylphenyl)imidazolylidene)(cyclooctadiene), 1 .....                                                                                                                                                                                                                                                                                     | 5  |
| 3. Spectroscopic analysis of the behaviour of 1 in solution.....                                                                                                                                                                                                                                                                                                                                                 | 6  |
| Methods used in the calculation of mesityl group rates of rotation .....                                                                                                                                                                                                                                                                                                                                         | 6  |
| Lineshape analysis of the mesityl protons using Topspin DNMR program .....                                                                                                                                                                                                                                                                                                                                       | 10 |
| Crystal structure of 1 .....                                                                                                                                                                                                                                                                                                                                                                                     | 13 |
| 4. Reactivity of 1 towards hydrogen and pyridine.....                                                                                                                                                                                                                                                                                                                                                            | 23 |
| Activation of 1 with hydrogen to form 2 .....                                                                                                                                                                                                                                                                                                                                                                    | 23 |
| Addition of pyridine and hydrogen and analysis of the active complex, 3.....                                                                                                                                                                                                                                                                                                                                     | 24 |
| UV-Vis analysis .....                                                                                                                                                                                                                                                                                                                                                                                            | 28 |
| IR data .....                                                                                                                                                                                                                                                                                                                                                                                                    | 30 |
| Lineshape analysis of the hydride exchange using Topspin DNMR program .....                                                                                                                                                                                                                                                                                                                                      | 31 |
| 5. Exchange properties of 3 relating to SABRE .....                                                                                                                                                                                                                                                                                                                                                              | 36 |
| Pyridine exchange rates in CD <sub>2</sub> Cl <sub>2</sub> .....                                                                                                                                                                                                                                                                                                                                                 | 36 |

|                                                                                                              |    |
|--------------------------------------------------------------------------------------------------------------|----|
| Hydride-hydrogen exchange at 298 K in CD <sub>2</sub> Cl <sub>2</sub> .....                                  | 37 |
| Hydride-Deuterium Exchange rates in MeOD- <i>d</i> <sub>4</sub> .....                                        | 40 |
| Pyridine exchange at 298 K in MeOH- <i>d</i> <sub>3</sub> (10 eq. of pyridine) .....                         | 43 |
| Hydride-hydrogen exchange at 298 K in MeOH- <i>d</i> <sub>3</sub> (10 eq. of pyridine) .....                 | 44 |
| Exchange rates for pyridine and hydride at 294 K in MeOH- <i>d</i> <sub>3</sub> .....                        | 45 |
| Exchange rates vs temperature in MeOH- <i>d</i> <sub>3</sub> .....                                           | 46 |
| 6. Polarization transfer experiments .....                                                                   | 48 |
| Calculation of <sup>1</sup> H NMR enhancement factors .....                                                  | 48 |
| Samples for polarization transfer experiments .....                                                          | 49 |
| Polarization transfer to pyridine using 1 as a catalyst using method A.....                                  | 49 |
| Polarization transfer to pyridine using 1 as a catalyst using method B.....                                  | 51 |
| Influence of temperature on polarization transfer to pyridine using 1 as a catalyst using method A .....     | 53 |
| Influence of temperature on polarization transfer to pyridine using 4 as a catalyst using method A .....     | 54 |
| Polarization transfer to nicotinamide using 1 as a catalyst using method A.....                              | 56 |
| Polarization transfer to nicotinamide using 1 as a catalyst using method B.....                              | 58 |
| Influence of temperature on polarization transfer to nicotinamide using 1 as a catalyst using method A ..... | 61 |
| Influence of temperature on polarization transfer to nicotinamide using 4 as a catalyst using method A ..... | 62 |
| Examination of the effect of solvent on the reaction of 3 with <i>p</i> -H <sub>2</sub> .....                | 64 |
| 7. References .....                                                                                          | 66 |

## 1. General experimental

**Analysis.** Errors were calculated using the Jackknife method, eliminating each value in turn and recalculating the activation parameters. The standard deviations were then calculated for each set of activation values and from this the standard error was calculated as described in Figure S1.<sup>1</sup>

Standard Deviation

$$s = \sqrt{\frac{\sum(x - \bar{x})^2}{(n - 1)}}$$

where:  $s$  = standard deviation

$x$  = measured values

$\bar{x}$  = sample mean

$n$  = sample size

Standard Error

$$St\ error = \frac{s(n - 1)}{\sqrt{n}}$$

where:  $s$  = standard deviation

$n$  = sample size

*Figure S1. Calculation of standard deviation and standard error*

## 2. Synthesis details of the synthesis of 1-(2,4,6-trimethylphenyl)-1H-imidazole, 3-(2-methylene-4-nitrophenol)-1-(2,4,6-trimethylphenyl) imidazolium bromide (L<sub>1</sub>HBr), silver(II) 3-(2-methylene-4-nitrophenolate)-1-(2,4,6-trimethylphenyl)imidazolylidene (AgL<sub>1</sub>) and iridium(I) (3-(2-methylene-4-nitrophenolate)-1-(2,4,6-trimethylphenyl)imidazolylidene)(cyclooctadiene) (1)

### Synthesis of 1-(2,4,6-trimethylphenyl)-1H-imidazole<sup>2</sup>

Glacial acetic acid (10 ml), aqueous formaldehyde (3 ml, 37 wt %, 40 mmol) and aqueous glyoxal (4.6 ml, 40 wt %, 40 mmol) were added to a round bottom flask and heated at 70°C. A solution of glacial acetic acid (10 ml), ammonium acetate (3.08 g, 40 mmol, in 2 ml water) and mesitylamine (5.6 ml, 40 mmol) was added dropwise to the flask over a period of 30 min. The resulting solution was continuously stirred and heated for 18 h. The reaction mixture was cooled to room temperature and was added dropwise to a stirred solution of sodium hydrogen carbonate (29.4 g in 300 ml water). The product formed a precipitate which was filtered off and washed with water before being allowed to air dry. The brown solid was dissolved in the minimal amount of ethyl acetate and placed in a freezer o/n whereupon the required product crystallised and was isolated via filtration (4.36 g, yield 59 %); <sup>1</sup>H NMR [CDCl<sub>3</sub>, 400 MHz] δ 7.44 (s, 1H, CH<sub>imidazole</sub>), 7.24 (s, 1H, CH<sub>imidazole</sub>), 6.98 (s, 2H, 2xCH<sub>mesityl</sub>), 6.90 (s, 1H, CH<sub>imidazole</sub>), 2.35 (s, 3H, CH<sub>3</sub>), 2.00 (s, 6H, 2xCH<sub>3</sub>); <sup>13</sup>C{<sup>1</sup>H} NMR [CDCl<sub>3</sub>] δ 138.8, 137.5, 135.4, 133.4, 129.5, 129.0, 120.1, 21.0 (CH<sub>3</sub>), 17.3 (2xCH<sub>3</sub>); MS [ESI] m/z 187.0 (M+H)<sup>+</sup>

### Synthesis of 3-(2-methylene-4-nitrophenol)-1-(2,4,6-trimethylphenyl) imidazolium bromide, L<sub>1</sub>HBr<sup>3</sup>

1-(2,4,6-trimethylphenyl)-1H-imidazole (0.61 g, 3.3 mmol) and 2-hydroxy-5-nitrobenzyl bromide (0.76 g, 3.3 mmol) were dissolved in toluene (8 ml). The resulting mixture was refluxed for 18 h and then the solution was cooled to room temperature. The precipitate was collected via vacuum filtration and was washed with diethyl ether (1.25 g, yield 91 %); <sup>1</sup>H NMR [DMSO, 400 MHz] δ 11.81 (s, 1H, OH), 9.55 (s, 1H, CH<sub>imidazole</sub>), 8.39 (d, 1H, <sup>4</sup>J(HH) = 2.55 Hz, CH<sub>aromatic</sub>), 8.22 (dd, 1H, <sup>4</sup>J(HH) = 2.55 Hz, <sup>3</sup>J(HH) = 9.04 Hz, CH<sub>aromatic</sub>), 8.05 (s, 1H, CH<sub>imidazole</sub>), 7.94 (s, 1H, CH<sub>imidazole</sub>), 7.15 (s, 2H, 2xCH<sub>mesityl</sub>), 7.09 (d, 1H, <sup>3</sup>J(HH) = 9.04 Hz, CH<sub>aromatic</sub>), 5.53 (s, 2H, CH<sub>2</sub>), 2.33 (s, 3H, CH<sub>3</sub>), 2.01 (s, 6H, 2xCH<sub>3</sub>); <sup>13</sup>C{<sup>1</sup>H} NMR [DMSO, 500 MHz] δ 163.3 (C<sub>aromatic</sub>), 141.2 (C<sub>aromatic</sub>), 140.3 (C<sub>aromatic</sub>), 139.1 (CH<sub>imidazole</sub>), 135.2 (C<sub>aromatic</sub>), 132.0 (C<sub>aromatic</sub>), 130.1 (2xCH<sub>mesityl</sub>), 128.1 (CH<sub>aromatic</sub>), 127.9 (CH<sub>aromatic</sub>), 125.0 (CH<sub>imidazole</sub>), 124.1 (CH<sub>imidazole</sub>), 122.2 (C<sub>aromatic</sub>), 116.7 (CH<sub>aromatic</sub>), 49.2 (CH<sub>2</sub>), 21.5 (CH<sub>3</sub>), 17.7 (2xCH<sub>3</sub>); MS [ESI] m/z 338.1 (M-Br)<sup>+</sup>

### Synthesis of silver(II) 3-(2-methylene-4-nitrophenolate)-1-(2,4,6-trimethylphenyl)imidazolylidene, AgL<sub>1</sub><sup>3</sup>

L<sub>1</sub> (500 mg, 1.2 mmol), silver (I) oxide (569.4 mg, 2.5 mmol) and 4Å molecular sieves (1.12 g) were added to a Schlenk flask under a nitrogen atmosphere. Dried THF (8.5 ml) and toluene (8.5 ml) were added to the flask and the reaction mixture was stirred at reflux for 3 h. Once cooled to room temperature, the mixture was diluted with dichloromethane (80 ml), filtered through a pad of celite and washed through with dichloromethane (2 x 5 ml). The solvent was removed under pressure to produce a yellow solid (0.45 g, yield 85%); <sup>1</sup>H NMR [CDCl<sub>3</sub>, 400 MHz] δ 8.16 (s br, 1H, CH<sub>aromatic</sub>), 7.78 (s br, 1H, CH<sub>aromatic</sub>), 7.38 (s br, 1H, CH<sub>aromatic</sub>), 7.01 (s br, 2H, 2xCH<sub>mesityl</sub>), 6.99 (s br, 1H, CH<sub>aromatic</sub>), 5.84

(s br, 1H, CH<sub>aromatic</sub>), 5.27 (s br, 2H, CH<sub>2</sub>), 2.42 (s, 3H, CH<sub>3</sub>), 1.96 (s br, 6H, 2xCH<sub>3</sub>); <sup>13</sup>C{<sup>1</sup>H} NMR [CDCl<sub>3</sub>] δ 174.7, 139.6, 137.2, 135.2, 134.5, 129.2 (2xCH<sub>mesityl</sub>), 127.2 (CH<sub>aromatic</sub>), 126.8 (CH<sub>aromatic</sub>), 124.4, 122.2, 121.9 (CH<sub>aromatic</sub>), 121.5 (CH<sub>aromatic</sub>), 50.3 (CH<sub>2</sub>), 21.4 (CH<sub>3</sub>), 17.9 (2xCH<sub>3</sub>); MS [ESI] m/z 783 (Ag dimer, protonated phenol groups)

### Synthesis of iridium(I) (3-(2-methylene-4-nitrophenolate)-1-(2,4,6-trimethylphenyl)imidazolylidene)(cyclooctadiene), 1

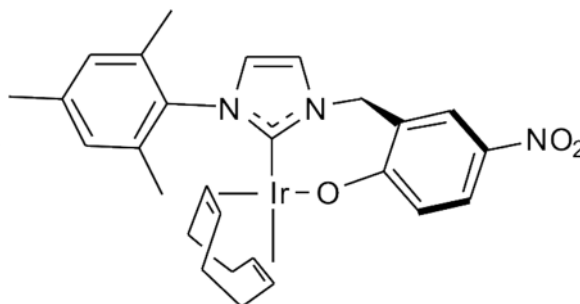

AgL<sub>1</sub> (170 mg, 0.38 mmol) and [Ir(COD)Cl]<sub>2</sub> (129 mg, 0.19 mmol) were added to a Schlenk flask, which was evacuated and filled with nitrogen. Dry THF (12 ml) was added to the flask and the reaction mixture was stirred overnight at room temperature. The mixture was diluted with DCM, filtered through a pad of celite then purified by column chromatography (silica, DCM:acetone 80:20). It was evaporated to dryness to produce an orange/brown powder (0.23 g, yield 96 %); <sup>1</sup>H NMR [CD<sub>2</sub>Cl<sub>2</sub>, 500 MHz, 298 K] δ 8.17 (d, 1H, <sup>4</sup>J(HH) = 3.05 Hz, CH<sub>aromatic</sub>), 7.96 (dd, 1H, <sup>4</sup>J(HH) = 3.05 Hz, <sup>3</sup>J(HH) = 9.28 Hz, CH<sub>aromatic</sub>), 7.14 (d, 1H, <sup>3</sup>J(HH) = 1.94 Hz, CH<sub>imidazole</sub>), 7.03 (s, br, 2H, 2xCH<sub>mesityl</sub>), 6.72 (d, 1H, <sup>3</sup>J(HH) = 1.94 Hz, CH<sub>imidazole</sub>), 6.60 (s v. br, 1H, CH<sub>2</sub> linker), 6.57 (d, 1H, <sup>3</sup>J(HH) = 9.28 Hz, CH<sub>aromatic</sub>), 4.79 (s v. br, 1H, CH<sub>2</sub> linker), 4.40 (s, v. br, 2H, 2xCH<sub>COD</sub>), 3.30 (s v. br, 1H, CH<sub>COD</sub>), 2.45 (s v. br, 1H, CH<sub>COD</sub>), 2.39 (s, 3H, CH<sub>3</sub>), 2.09 (s br, 4H, CH<sub>2</sub> COD), 2.03 (s br, 6H, 2xCH<sub>3</sub>), 1.58 (s br, 4H, CH<sub>2</sub> COD); <sup>1</sup>H NMR [CD<sub>2</sub>Cl<sub>2</sub>, 500 MHz, 253 K] δ 8.18 (d, 1H, <sup>4</sup>J(HH) = 3.01 Hz, CH<sub>aromatic</sub>), 7.96 (dd, 1H, <sup>4</sup>J(HH) = 3.01 Hz, <sup>3</sup>J(HH) = 9.24 Hz), 7.14 (d, 1H, <sup>3</sup>J(HH) = 1.87 Hz, CH<sub>imidazole</sub>), 7.06 (s, 1H, CH<sub>mesityl</sub>), 6.96 (s, 1H, CH<sub>mesityl</sub>), 6.72 (d, 1H, <sup>3</sup>J(HH) = 1.87 Hz, CH<sub>imidazole</sub>), 6.60 (d, 1H, <sup>2</sup>J(HH) = 14.02 Hz, CH<sub>2</sub> linker), 6.55 (d, 1H, <sup>3</sup>J(HH) = 9.24 Hz, CH<sub>aromatic</sub>), 4.79 (d, 1H, <sup>2</sup>J(HH) = 14.02 Hz, CH<sub>2</sub> linker), 4.42 (m, 1H, CH<sub>COD</sub>), 4.26 (m, 1H, CH<sub>COD</sub>), 3.27 (m, 1H, CH<sub>COD</sub>), 2.41 (m, 1H, CH<sub>COD</sub>), 2.36 (s, 3H, CH<sub>3</sub>), 2.20 – 2.00 (m, 4H, 2xCH<sub>2</sub> COD), 2.07 (s, 3H, CH<sub>3</sub>), 1.96 (s, 3H, CH<sub>3</sub>), 1.68 – 1.53 (m, 4H, 2xCH<sub>2</sub> COD); <sup>13</sup>C{<sup>1</sup>H} NMR [CD<sub>2</sub>Cl<sub>2</sub>, 500 MHz, 253 K] δ 175.7 (C-OIr), 175.1 (C-Ir), 139.0 (C<sub>aromatic</sub>), 136.1 (C<sub>aromatic</sub>), 135.5 (C<sub>aromatic</sub>), 134.4 (C<sub>aromatic</sub>), 134.0 (C<sub>aromatic</sub>), 129.1 (CH<sub>aromatic</sub>), 128.4 (CH<sub>aromatic</sub>), 127.0 (CH<sub>aromatic</sub>), 126.3 (CH<sub>aromatic</sub>), 123.4 (CH<sub>imidazole</sub>), 123.2 (C<sub>aromatic</sub>), 121.5 (CH<sub>aromatic</sub>), 119.6 (CH<sub>imidazole</sub>), 84.7 (CH), 84.6 (CH), 51.2 (CH<sub>2</sub>), 49.7 (CH), 48.3 (CH), 34.5 (CH<sub>2</sub>), 33.8 (CH<sub>2</sub>), 28.9 (CH<sub>2</sub>), 28.4 (CH<sub>2</sub>), 21.0 (CH<sub>3</sub>), 18.7 (CH<sub>3</sub>), 17.6 (CH<sub>3</sub>); MS [ESI] m/z 636.19. Anal. Calcd for C<sub>27</sub>H<sub>30</sub>N<sub>3</sub>O<sub>3</sub>Ir (M<sub>r</sub> = 636.77): C, 50.93; H, 4.75; N, 6.60. Found: C, 50.64; H, 4.52; N, 6.14.

### 3. Spectroscopic analysis of the behaviour of **1** in solution

The protons in **1** are strongly affected by temperature. At 298 K rapid motion occurs so that protons in the aliphatic range and the COD alkene protons appear very broad. Cooling to 253 K shows resolved signals in the NMR spectrum as the motion is reduced. This is shown in Figure S2.

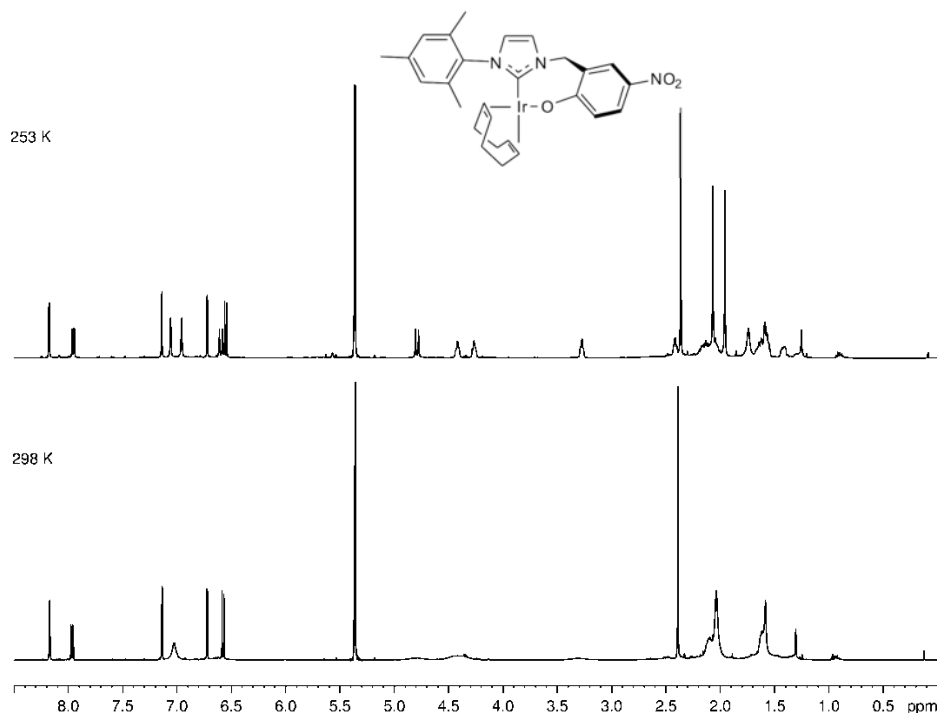

*Figure S2. Comparison of <sup>1</sup>H NMR of **1** at 253 K and 298 K showing resolved peaks*

#### Methods used in the calculation of mesityl group rates of rotation

The rapid motion causing the aromatic protons of the mesityl group to coalesce at higher temperature corresponds to rotation of this group around the single bond to the imidazole centre. This rate of rotation at different temperatures and hence calculation of the activation energy was roughly estimated by calculation from the NMR data and the linewidths of the peaks at half height as described in Figure S3. Assuming that at 248 K the exchange was very slow, then the linewidth at half the maximum peak height could be measured and the rate constants at each temperature determined.

Slow exchange

$$k = \pi(h_e - h_o)$$

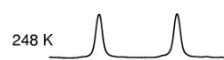

Intermediate exchange

$$k = \frac{\pi\sqrt{(\Delta\nu_o)^2 - \Delta\nu_e^2}}{\sqrt{2}}$$

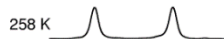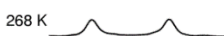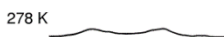

Coalescence

$$k = \frac{\pi\Delta\nu_o}{\sqrt{2}}$$

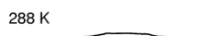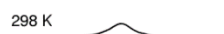

Fast exchange

$$k = \frac{\pi\Delta\nu_o^2}{2(h_e - h_o)}$$

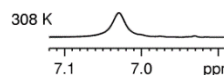

where:  $k$  = rate constant /  $s^{-1}$

$h_e$  = peak width at half height with exchange

$h_o$  = peak width at half height with no exchange /  $5.03 s^{-1}$

$\Delta\nu_e$  = peak frequency difference with exchange

$\Delta\nu_o$  = peak frequency difference with no exchange /  $50.46 s^{-1}$

**Figure S3. Lineshape analysis equations and corresponding  $^1H$  NMR spectra for calculating rotation rates for the mesiyl group rotation**

The rate constants listed in Table S1 were determined using the equations listed in Figure S3 and make the assumption that no exchange occurs at 248 K. This introduces a systematic error in the values which we estimate is no larger than 10%. Figure S4 shows the equations used to calculate the appropriate activation parameters for this rotation process and Figures S5 and S6 are the corresponding Arrhenius and Eyring-Polanyi plots.

**Table S1. Experimental rate data for the mestiy group rotation**

| <b>T (K)</b> | <b>1/T (K<sup>-1</sup>)</b> | <b>k (s<sup>-1</sup>)</b> | <b>ln(2k / s<sup>-1</sup>)</b> | <b>ln(2k/T / s<sup>-1</sup> K<sup>-1</sup>)</b> |
|--------------|-----------------------------|---------------------------|--------------------------------|-------------------------------------------------|
| 248          | 0.00403                     | 0                         | -                              | -                                               |
| 258          | 0.00388                     | 3.8                       | 2.0                            | -3.5                                            |
| 268          | 0.00373                     | 15.7                      | 3.5                            | -2.1                                            |
| 278          | 0.00360                     | 48.8                      | 4.6                            | -1.2                                            |
| 288          | 0.00347                     | 112.1                     | 5.4                            | -0.3                                            |
| 298          | 0.00336                     | 260.4                     | 6.3                            | 0.6                                             |
| 308          | 0.00325                     | 766.2                     | 7.3                            | 1.6                                             |

Arrhenius equation:

$$k = Ae^{-E_a/RT}$$

$$\ln(k) = -\frac{E_a}{R}\left(\frac{1}{T}\right) + \ln(A)$$

where:  $k$  = rate constant / s<sup>-1</sup>

$E_a$  = Activation energy / J mol<sup>-1</sup>

$T$  = temperature / K

$R$  = Gas constant / 8.314 J K<sup>-1</sup> mol<sup>-1</sup>

$A$  = Pre-exponential factor

Eyring-Polanyi equation:

$$k = \frac{k_B T}{h} e^{-\Delta G^\ddagger/RT}$$

$$\ln\left(\frac{k}{T}\right) = \frac{-\Delta H^\ddagger}{R}\left(\frac{1}{T}\right) + \ln\left(\frac{k_B}{h}\right) + \frac{\Delta S^\ddagger}{R}$$

where:  $k$  = rate constant / s<sup>-1</sup>

$T$  = temperature / K

$R$  = Gas constant / 8.314 J K<sup>-1</sup> mol<sup>-1</sup>

$\Delta H^\ddagger$  = enthalpy of activation / J mol<sup>-1</sup>

$\Delta S^\ddagger$  = entropy of activation / J K<sup>-1</sup>

$h$  = Planck's constant /

6.626 x 10<sup>-34</sup> kg m<sup>2</sup> s<sup>-1</sup>

$k_B$  = Boltzmann constant /

1.38 x 10<sup>-23</sup> J K<sup>-1</sup>

**Figure S4. Arrhenius and Eyring-Polanyi equations used in this analysis**



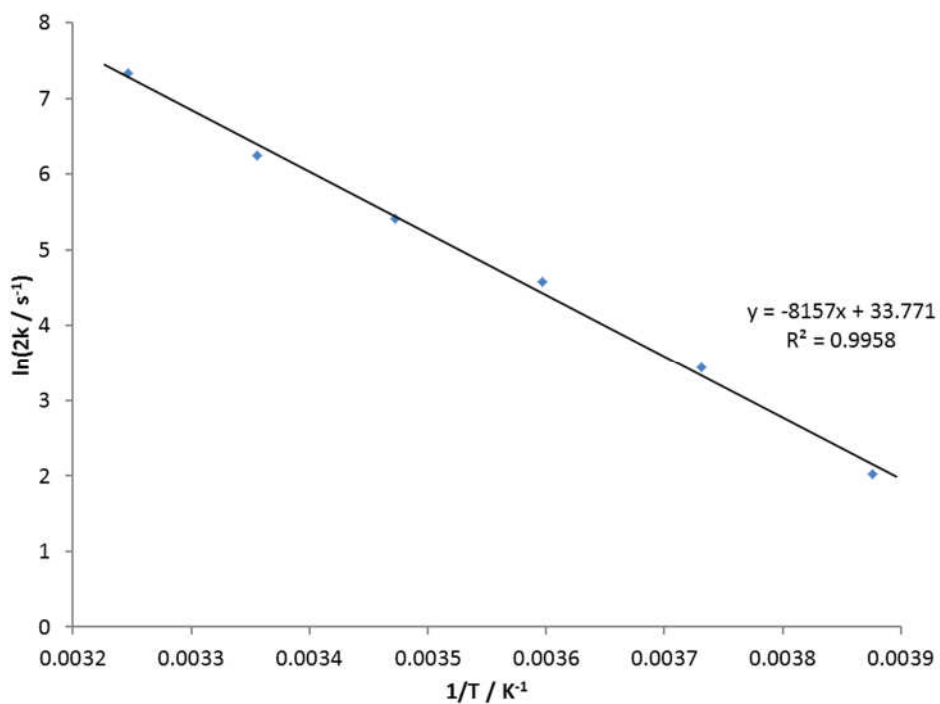

Figure S5. Arrhenius plot of experimental rate data for the mesityl rotation

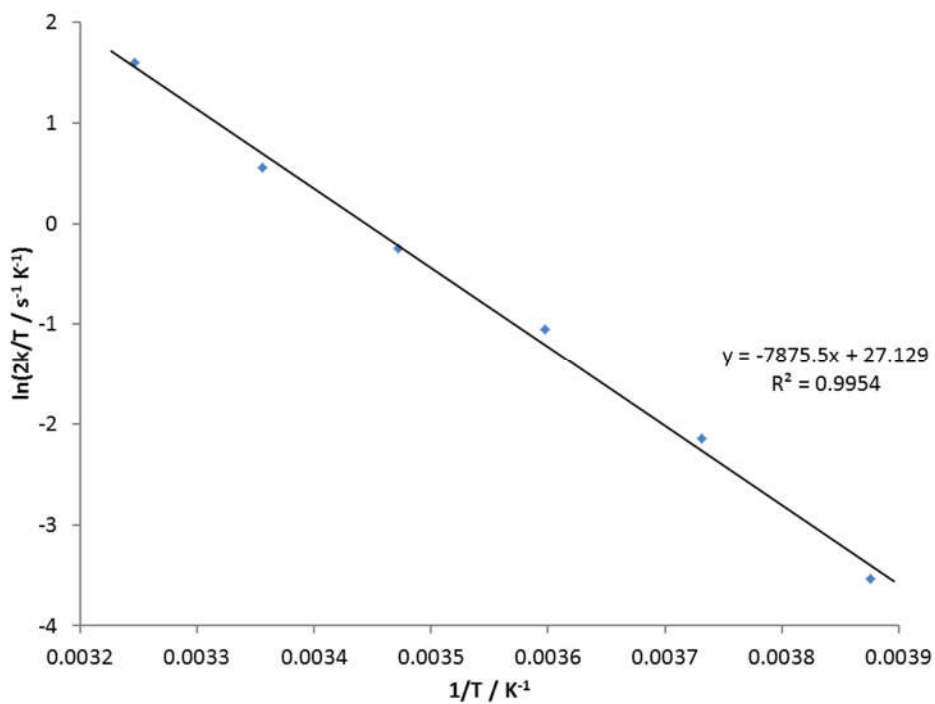

Figure S6. Eyring-Polanyi plot of experimental rate data for the mesityl rotation

### Lineshape analysis of the mesityl protons using Topspin DNMR program

Lineshape analysis using the Topspin DNMR program enabled a more accurate estimate of the rate constants at differing temperatures. For the lineshape analysis, the line broadening effect was set to 3.5 Hz and the generated spectra had a 96 % agreement level with the experimental spectra. The values for the simulated exchange rates are shown in Table S2. For both the experimental data analysis and the lineshape analysis using simulated data, the two highest temperatures of 298 and 308 K were excluded from the calculations. The simulation could not be relied upon to give reliable data because the two proton peaks overlap at these higher temperatures. Therefore a value for the exchange rate could not be calculated as the simulation program only observes one peak and we note that this systematic error is not included in the error range in Figure S7. The two points were excluded from the experimental data during analysis, in order for the data sets to be comparable and include the same temperature range. The corresponding Arrhenius and Eyring-Polanyi plots are shown in Figures S7 and S8 with the determined activation parameters summarized in Table S3.

*Table S2. Simulated rate data for the mesityl group rotation*

| <b>T (K)</b> | <b>1/T (K<sup>-1</sup>)</b> | <b>k (s<sup>-1</sup>)</b> | <b>ln(2k / s<sup>-1</sup>)</b> | <b>ln(2k/T / s<sup>-1</sup> K<sup>-1</sup>)</b> |
|--------------|-----------------------------|---------------------------|--------------------------------|-------------------------------------------------|
| 248          | 0.00403                     | 1.16 ± 0.05               | 0.84 ± 0.03                    | -4.67 ± 0.19                                    |
| 258          | 0.00388                     | 5.5 ± 0.2                 | 2.40 ± 0.10                    | -3.15 ± 0.13                                    |
| 268          | 0.00373                     | 17.6 ± 0.7                | 3.56 ± 0.14                    | -2.03 ± 0.08                                    |
| 278          | 0.00360                     | 50.3 ± 2.0                | 4.61 ± 0.18                    | -1.02 ± 0.04                                    |
| 288          | 0.00347                     | 122.2 ± 4.9               | 5.50 ± 0.22                    | -0.16 ± 0.01                                    |
| 298          | 0.00336                     | 2720 ± 109                | 8.60 ± 0.34                    | 2.90 ± 0.12                                     |
| 308          | 0.00325                     | 7005 ± 280                | 9.55 ± 0.38                    | 3.82 ± 0.15                                     |

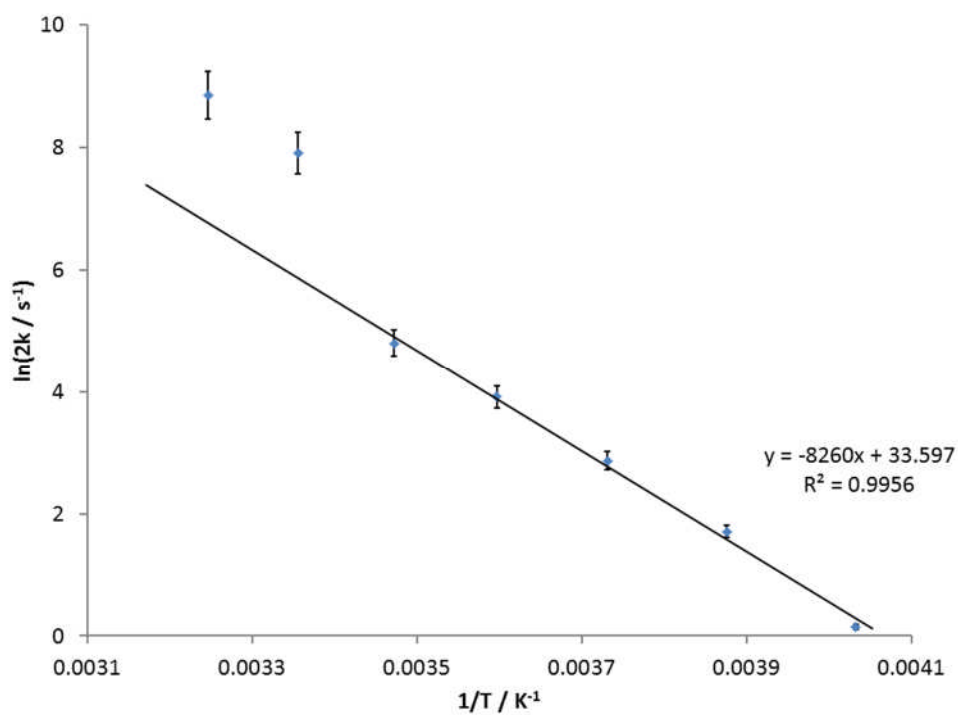

Figure S7. Arrhenius plot of simulated rate data for the mesityl rotation

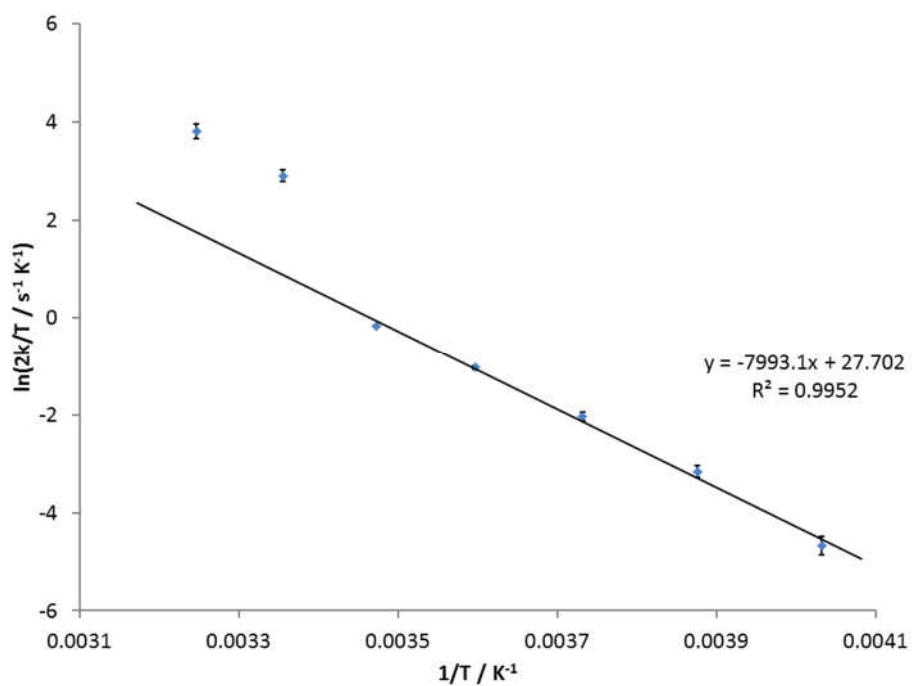

Figure S8. Eyring-Polanyi plot of simulated rate data for the mesityl rotation

*Table S3. Summary of activation parameters for the experimental and simulated data for the mesityl rotation*

| <b>Equation used</b> | <b>Data set</b> | <b>Activation energy (<math>E_a/\Delta H^\ddagger</math>) / kJ mol<sup>-1</sup></b> | <b>Graph R<sup>2</sup> value</b> | <b>Activation entropy (<math>\Delta S^\ddagger</math>) / J K<sup>-1</sup> mol<sup>-1</sup></b> | <b><math>\Delta G</math> (300 K) / kJ mol<sup>-1</sup></b> |
|----------------------|-----------------|-------------------------------------------------------------------------------------|----------------------------------|------------------------------------------------------------------------------------------------|------------------------------------------------------------|
| Arrhenius            | Experimental    | 67.8 ± 3.1                                                                          | 0.9958                           | -                                                                                              | -                                                          |
|                      | Simulated       | 68.7 ± 5.1                                                                          | 0.9956                           | -                                                                                              | -                                                          |
| Eyring-Polanyi       | Experimental    | 65.5 ± 3.1                                                                          | 0.9954                           | 28.0 ± 10.9                                                                                    | 57.1 ± 1.0                                                 |
|                      | Simulated       | 66.5 ± 5.1                                                                          | 0.9952                           | 32.8 ± 18.9                                                                                    | 56.6 ± 1.0                                                 |

## Crystal structure of **1**

The x-ray crystal structure of **1** is shown in Figure S9 with Tables S4 – S11 containing the corresponding structural details.

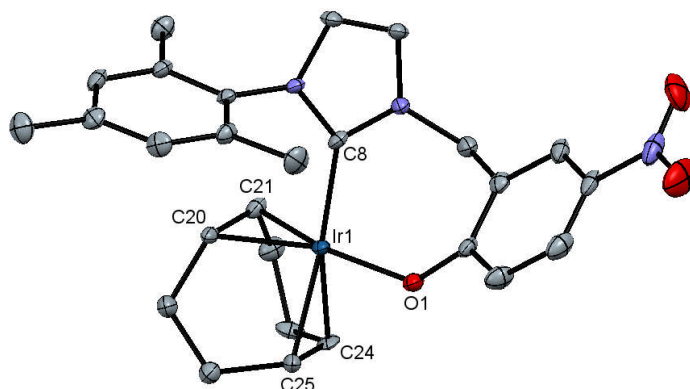

*Figure S9. ORTEP plot of **1** determined at 110 K, using crystals grown by the slow diffusion of hexane into a dichloromethane solution of **1***

*Table S4. Crystal data and structure refinement for **1***

|                                    |                                                                                  |
|------------------------------------|----------------------------------------------------------------------------------|
| Identification code                | sbd1402                                                                          |
| Empirical formula                  | C <sub>27</sub> H <sub>30</sub> Ir <sub>1.04</sub> N <sub>3</sub> O <sub>3</sub> |
| Formula weight                     | 644.77                                                                           |
| Temperature/K                      | 110.05(10)                                                                       |
| Crystal system                     | monoclinic                                                                       |
| Space group                        | P2 <sub>1</sub> /n                                                               |
| a/Å                                | 8.7533(3)                                                                        |
| b/Å                                | 19.4098(11)                                                                      |
| c/Å                                | 13.9131(4)                                                                       |
| α/°                                | 90                                                                               |
| β/°                                | 90.472(3)                                                                        |
| γ/°                                | 90                                                                               |
| Volume/Å <sup>3</sup>              | 2363.77(17)                                                                      |
| Z                                  | 4                                                                                |
| ρ <sub>calc</sub> /cm <sup>3</sup> | 1.812                                                                            |

|                                                |                                                               |
|------------------------------------------------|---------------------------------------------------------------|
| $\mu/\text{mm}^{-1}$                           | 5.918                                                         |
| F(000)                                         | 1269.0                                                        |
| Crystal size/ $\text{mm}^3$                    | $0.1894 \times 0.1261 \times 0.0302$                          |
| Radiation                                      | MoK $\alpha$ ( $\lambda = 0.71073$ )                          |
| 2 $\theta$ range for data collection/ $^\circ$ | 5.86 to 59.996                                                |
| Index ranges                                   | $-7 \leq h \leq 12, -23 \leq k \leq 27, -19 \leq l \leq 19$   |
| Reflections collected                          | 12799                                                         |
| Independent reflections                        | 6892 [ $R_{\text{int}} = 0.0326, R_{\text{sigma}} = 0.0509$ ] |
| Data/restraints/parameters                     | 6892/0/321                                                    |
| Goodness-of-fit on $F^2$                       | 1.143                                                         |
| Final R indexes [ $I \geq 2\sigma(I)$ ]        | $R_1 = 0.0345, wR_2 = 0.0675$                                 |
| Final R indexes [all data]                     | $R_1 = 0.0415, wR_2 = 0.0701$                                 |
| Largest diff. peak/hole / $e \text{ \AA}^{-3}$ | 1.81/-1.39                                                    |

*Table S5. Fractional Atomic Coordinates ( $\times 10^4$ ) and Equivalent Isotropic Displacement Parameters ( $\text{\AA}^2 \times 10^3$ ) for sbd1402.  $U_{\text{eq}}$  is defined as 1/3 of the trace of the orthogonalized UIJ tensor*

| Atom | x         | y          | z         | U(eq)    |
|------|-----------|------------|-----------|----------|
| Ir1  | 2966.0(2) | 1809.2(2)  | 7888.6(2) | 12.02(5) |
| O1   | 4920(4)   | 2375.2(19) | 7629(2)   | 18.3(7)  |
| O2   | 8985(5)   | 4766(3)    | 9173(3)   | 52.6(14) |
| O3   | 6772(5)   | 5187(2)    | 9453(3)   | 41.8(11) |
| N1   | 7598(5)   | 4727(3)    | 9159(3)   | 30.8(11) |
| N2   | 2339(4)   | 3011(2)    | 9140(2)   | 14.1(7)  |
| N3   | 2174(4)   | 2128(2)    | 10051(2)  | 12.3(7)  |
| C1   | 5492(5)   | 2926(3)    | 8028(3)   | 16.5(9)  |
| C2   | 7112(5)   | 2979(3)    | 8093(3)   | 24.0(11) |

|     |         |         |          |          |
|-----|---------|---------|----------|----------|
| C3  | 7790(6) | 3566(3) | 8450(3)  | 27.5(12) |
| C4  | 6897(6) | 4106(3) | 8772(3)  | 21.4(10) |
| C5  | 5311(6) | 4070(3) | 8739(3)  | 19.9(10) |
| C6  | 4599(5) | 3487(3) | 8364(3)  | 16.6(9)  |
| C7  | 2880(5) | 3447(3) | 8346(3)  | 17.9(9)  |
| C8  | 2529(4) | 2324(2) | 9143(3)  | 12.2(8)  |
| C9  | 1851(5) | 3252(3) | 10020(3) | 15.7(9)  |
| C10 | 1741(5) | 2697(3) | 10591(3) | 16.3(9)  |
| C11 | 2403(5) | 1450(2) | 10448(3) | 12.7(8)  |
| C12 | 1137(5) | 1059(3) | 10718(3) | 14.2(9)  |
| C13 | 1398(5) | 410(3)  | 11098(3) | 17.7(9)  |
| C14 | 2872(6) | 139(3)  | 11216(3) | 19.5(9)  |
| C15 | 4097(5) | 549(3)  | 10942(3) | 20.4(10) |
| C16 | 3902(5) | 1204(3) | 10574(3) | 16.6(9)  |
| C17 | -463(5) | 1325(3) | 10604(3) | 21.7(10) |
| C18 | 3096(6) | -564(3) | 11649(4) | 26.2(11) |
| C19 | 5256(5) | 1642(3) | 10320(4) | 25.7(11) |
| C20 | 1550(5) | 955(3)  | 8178(3)  | 16.3(9)  |
| C21 | 644(5)  | 1536(3) | 7866(3)  | 16.5(9)  |
| C22 | -41(5)  | 1614(3) | 6871(3)  | 22.5(11) |
| C23 | 1093(5) | 1438(3) | 6069(3)  | 20.3(10) |
| C24 | 2715(6) | 1611(3) | 6349(3)  | 21.8(10) |
| C25 | 3732(5) | 1132(2) | 6736(3)  | 16.0(9)  |
| C26 | 3280(5) | 393(3)  | 6938(3)  | 18.9(9)  |
| C27 | 1830(6) | 332(3)  | 7546(3)  | 20.6(10) |

|      |         |         |         |       |
|------|---------|---------|---------|-------|
| Ir1A | 1603(8) | 1783(3) | 7966(4) | 37(2) |
|------|---------|---------|---------|-------|

*Table S6. Anisotropic Displacement Parameters ( $\text{\AA}^2 \times 10^3$ ) for sbd1402. The Anisotropic displacement factor exponent takes the form:  $-2\pi^2[h^2a^{*2}U_{11}+2hka^*b^*U_{12}+\dots]$*

| Atom | $U_{11}$ | $U_{22}$ | $U_{33}$ | $U_{23}$ | $U_{13}$ | $U_{12}$ |
|------|----------|----------|----------|----------|----------|----------|
| Ir1  | 14.66(8) | 12.75(8) | 8.69(6)  | -1.43(7) | 2.72(5)  | -2.05(7) |
| O1   | 20.1(16) | 20.0(19) | 14.9(14) | -4.5(14) | 5.5(12)  | -5.6(13) |
| O2   | 43(3)    | 70(4)    | 44(3)    | -14(3)   | 4(2)     | -39(3)   |
| O3   | 56(3)    | 24(2)    | 45(2)    | -7(2)    | -10(2)   | -14(2)   |
| N1   | 39(3)    | 36(3)    | 17.4(19) | 4(2)     | -1.7(17) | -23(2)   |
| N2   | 19.1(18) | 12.6(19) | 10.7(15) | -0.5(14) | 1.9(13)  | -2.3(14) |
| N3   | 11.7(16) | 15.6(19) | 9.6(15)  | -2.4(14) | 3.1(12)  | -1.4(15) |
| C1   | 19(2)    | 18(2)    | 12.3(19) | 0.3(18)  | 3.6(16)  | -7.7(18) |
| C2   | 18(2)    | 33(3)    | 21(2)    | -3(2)    | 3.6(17)  | -6(2)    |
| C3   | 22(2)    | 41(4)    | 20(2)    | 0(2)     | 1.3(18)  | -14(2)   |
| C4   | 27(2)    | 26(3)    | 11.0(18) | 4.2(19)  | 0.0(17)  | -15(2)   |
| C5   | 28(2)    | 19(3)    | 12.7(19) | 3.6(19)  | 0.4(17)  | -8(2)    |
| C6   | 21(2)    | 19(2)    | 10.1(18) | 1.9(18)  | 0.1(16)  | -3.6(18) |
| C7   | 23(2)    | 14(2)    | 17(2)    | 0.2(18)  | 2.9(17)  | 0.0(19)  |
| C8   | 12.8(19) | 15(2)    | 8.9(17)  | 1.9(17)  | 1.5(14)  | -1.9(16) |
| C9   | 17(2)    | 16(2)    | 14.8(18) | -5.4(18) | 4.6(15)  | -0.7(18) |
| C10  | 20(2)    | 17(2)    | 12.5(18) | -5.8(18) | 4.9(15)  | -0.5(18) |
| C11  | 16(2)    | 15(2)    | 7.6(16)  | -0.7(16) | 2.1(14)  | -1.0(16) |
| C12  | 15(2)    | 17(2)    | 10.5(17) | -0.6(17) | 2.9(15)  | -2.0(17) |
| C13  | 20(2)    | 21(3)    | 12.4(19) | 1.7(19)  | 2.4(15)  | -9.1(19) |
| C14  | 25(2)    | 21(3)    | 12.3(18) | 2.7(18)  | 0.2(17)  | 1(2)     |



|      |       |       |          |          |          |          |
|------|-------|-------|----------|----------|----------|----------|
| C15  | 19(2) | 25(3) | 17(2)    | 3(2)     | -3.0(17) | 6(2)     |
| C16  | 14(2) | 22(3) | 14.0(19) | -3.2(19) | 1.2(15)  | -5.2(18) |
| C17  | 18(2) | 27(3) | 20(2)    | 1(2)     | 0.5(17)  | -3(2)    |
| C18  | 29(3) | 21(3) | 29(2)    | 4(2)     | -6(2)    | 1(2)     |
| C19  | 15(2) | 30(3) | 33(3)    | -1(2)    | 3.7(18)  | -6(2)    |
| C20  | 21(2) | 15(2) | 13.2(18) | -4.3(18) | 6.9(15)  | -7.4(18) |
| C21  | 13(2) | 23(3) | 13.5(19) | -0.8(19) | 0.1(16)  | -9.8(19) |
| C22  | 18(2) | 31(3) | 19(2)    | -2(2)    | 0.1(17)  | -2(2)    |
| C23  | 25(2) | 22(3) | 13.7(19) | -9.7(19) | -2.2(17) | 2(2)     |
| C24  | 38(3) | 19(3) | 8.3(18)  | -0.3(18) | 8.7(18)  | -2(2)    |
| C25  | 22(2) | 12(2) | 13.9(19) | -2.5(17) | 7.3(16)  | -4.1(18) |
| C26  | 22(2) | 17(2) | 18(2)    | -0.5(19) | 3.1(16)  | -3.0(19) |
| C27  | 27(2) | 14(2) | 21(2)    | -2.4(19) | 6.5(18)  | -3.7(19) |
| Ir1A | 64(5) | 17(3) | 31(3)    | -14(2)   | 3(2)     | 2(3)     |

*Table S7. Bond lengths for 1*

| Atom | Atom | Length/Å | Atom | Atom | Length/Å |
|------|------|----------|------|------|----------|
| Ir1  | O1   | 2.067(3) | C5   | C6   | 1.390(7) |
| Ir1  | C8   | 2.049(4) | C6   | C7   | 1.506(7) |
| Ir1  | C20  | 2.111(5) | C9   | C10  | 1.342(7) |
| Ir1  | C21  | 2.101(5) | C11  | C12  | 1.398(6) |
| Ir1  | C24  | 2.185(4) | C11  | C16  | 1.406(6) |
| Ir1  | C25  | 2.183(4) | C12  | C13  | 1.383(7) |
| O1   | C1   | 1.303(6) | C12  | C17  | 1.500(6) |
| O2   | N1   | 1.216(6) | C13  | C14  | 1.402(7) |
| O3   | N1   | 1.222(7) | C14  | C15  | 1.391(7) |

|    |     |          |     |     |          |
|----|-----|----------|-----|-----|----------|
| N1 | C4  | 1.453(7) | C14 | C18 | 1.503(7) |
| N2 | C7  | 1.474(6) | C15 | C16 | 1.379(7) |
| N2 | C8  | 1.344(6) | C16 | C19 | 1.504(6) |
| N2 | C9  | 1.382(5) | C20 | C21 | 1.444(7) |
| N3 | C8  | 1.358(5) | C20 | C27 | 1.517(6) |
| N3 | C10 | 1.391(6) | C21 | C22 | 1.511(6) |
| N3 | C11 | 1.439(6) | C22 | C23 | 1.538(6) |
| C1 | C2  | 1.424(6) | C23 | C24 | 1.508(7) |
| C1 | C6  | 1.423(7) | C24 | C25 | 1.393(7) |
| C2 | C3  | 1.375(7) | C25 | C26 | 1.514(7) |
| C3 | C4  | 1.384(8) | C26 | C27 | 1.535(6) |
| C4 | C5  | 1.391(7) |     |     |          |

*Table S8. Bond Angles for 1*

| Atom | Atom | Atom | Angle/°    | Atom | Atom | Atom | Angle/°  |
|------|------|------|------------|------|------|------|----------|
| O1   | Ir1  | C20  | 159.87(16) | N2   | C7   | C6   | 110.1(4) |
| O1   | Ir1  | C21  | 158.95(17) | N2   | C8   | Ir1  | 120.3(3) |
| O1   | Ir1  | C24  | 89.92(16)  | N2   | C8   | N3   | 104.6(4) |
| O1   | Ir1  | C25  | 86.12(15)  | N3   | C8   | Ir1  | 134.5(4) |
| C8   | Ir1  | O1   | 92.88(14)  | C10  | C9   | N2   | 106.0(4) |
| C8   | Ir1  | C20  | 96.10(17)  | C9   | C10  | N3   | 107.3(4) |
| C8   | Ir1  | C21  | 87.03(17)  | C12  | C11  | N3   | 119.4(4) |
| C8   | Ir1  | C24  | 154.46(18) | C12  | C11  | C16  | 121.5(4) |
| C8   | Ir1  | C25  | 168.35(17) | C16  | C11  | N3   | 119.1(4) |
| C20  | Ir1  | C24  | 89.69(18)  | C11  | C12  | C17  | 121.7(4) |
| C20  | Ir1  | C25  | 81.46(17)  | C13  | C12  | C11  | 117.9(4) |

|     |     |     |           |     |     |     |          |
|-----|-----|-----|-----------|-----|-----|-----|----------|
| C21 | Ir1 | C20 | 40.10(19) | C13 | C12 | C17 | 120.4(4) |
| C21 | Ir1 | C24 | 81.48(18) | C12 | C13 | C14 | 122.4(4) |
| C21 | Ir1 | C25 | 98.06(18) | C13 | C14 | C18 | 120.3(4) |
| C25 | Ir1 | C24 | 37.19(18) | C15 | C14 | C13 | 117.6(4) |
| C1  | O1  | Ir1 | 132.6(3)  | C15 | C14 | C18 | 122.1(4) |
| O2  | N1  | O3  | 122.8(5)  | C16 | C15 | C14 | 122.4(4) |
| O2  | N1  | C4  | 118.5(6)  | C11 | C16 | C19 | 121.0(5) |
| O3  | N1  | C4  | 118.7(5)  | C15 | C16 | C11 | 118.2(4) |
| C8  | N2  | C7  | 122.1(4)  | C15 | C16 | C19 | 120.8(4) |
| C8  | N2  | C9  | 111.9(4)  | C21 | C20 | Ir1 | 69.6(3)  |
| C9  | N2  | C7  | 125.0(4)  | C21 | C20 | C27 | 122.7(4) |
| C8  | N3  | C10 | 110.2(4)  | C27 | C20 | Ir1 | 114.7(3) |
| C8  | N3  | C11 | 125.5(4)  | C20 | C21 | Ir1 | 70.3(2)  |
| C10 | N3  | C11 | 123.8(3)  | C20 | C21 | C22 | 124.5(4) |
| O1  | C1  | C2  | 117.8(5)  | C22 | C21 | Ir1 | 111.4(3) |
| O1  | C1  | C6  | 123.9(4)  | C21 | C22 | C23 | 112.9(4) |
| C6  | C1  | C2  | 118.2(5)  | C24 | C23 | C22 | 112.0(4) |
| C3  | C2  | C1  | 120.7(5)  | C23 | C24 | Ir1 | 112.3(3) |
| C2  | C3  | C4  | 120.0(5)  | C25 | C24 | Ir1 | 71.3(3)  |
| C3  | C4  | N1  | 120.7(5)  | C25 | C24 | C23 | 123.2(5) |
| C3  | C4  | C5  | 121.2(5)  | C24 | C25 | Ir1 | 71.5(3)  |
| C5  | C4  | N1  | 118.2(5)  | C24 | C25 | C26 | 122.5(4) |
| C6  | C5  | C4  | 119.8(5)  | C26 | C25 | Ir1 | 110.6(3) |
| C1  | C6  | C7  | 120.4(4)  | C25 | C26 | C27 | 113.2(4) |
| C5  | C6  | C1  | 120.0(4)  | C20 | C27 | C26 | 113.4(4) |

|    |    |    |          |  |  |  |  |
|----|----|----|----------|--|--|--|--|
| C5 | C6 | C7 | 119.6(5) |  |  |  |  |
|----|----|----|----------|--|--|--|--|

*Table S9. Torsion Angles for 1*

| A   | B   | C   | D   | Angle/°   | A   | B   | C   | D   | Angle/°   |
|-----|-----|-----|-----|-----------|-----|-----|-----|-----|-----------|
| Ir1 | O1  | C1  | C2  | 145.6(4)  | C8  | N3  | C10 | C9  | -1.0(5)   |
| Ir1 | O1  | C1  | C6  | -37.3(7)  | C8  | N3  | C11 | C12 | -115.5(5) |
| Ir1 | C20 | C21 | C22 | 103.0(4)  | C8  | N3  | C11 | C16 | 65.7(5)   |
| Ir1 | C20 | C27 | C26 | 10.3(5)   | C9  | N2  | C7  | C6  | 96.3(5)   |
| Ir1 | C21 | C22 | C23 | 34.7(6)   | C9  | N2  | C8  | Ir1 | 171.8(3)  |
| Ir1 | C24 | C25 | C26 | 103.1(4)  | C9  | N2  | C8  | N3  | -0.8(5)   |
| Ir1 | C25 | C26 | C27 | 28.4(5)   | C10 | N3  | C8  | Ir1 | -169.9(3) |
| O1  | C1  | C2  | C3  | 175.7(4)  | C10 | N3  | C8  | N2  | 1.1(5)    |
| O1  | C1  | C6  | C5  | -176.8(4) | C10 | N3  | C11 | C12 | 73.4(5)   |
| O1  | C1  | C6  | C7  | 5.1(7)    | C10 | N3  | C11 | C16 | -105.3(5) |
| O2  | N1  | C4  | C3  | 1.5(7)    | C11 | N3  | C8  | Ir1 | 18.0(6)   |
| O2  | N1  | C4  | C5  | -178.7(5) | C11 | N3  | C8  | N2  | -171.0(4) |
| O3  | N1  | C4  | C3  | -178.6(5) | C11 | N3  | C10 | C9  | 171.2(4)  |
| O3  | N1  | C4  | C5  | 1.2(7)    | C11 | C12 | C13 | C14 | -0.1(7)   |
| N1  | C4  | C5  | C6  | 179.3(4)  | C12 | C11 | C16 | C15 | 2.3(6)    |
| N2  | C9  | C10 | N3  | 0.4(5)    | C12 | C11 | C16 | C19 | -177.4(4) |
| N3  | C11 | C12 | C13 | -180.0(4) | C12 | C13 | C14 | C15 | 0.4(7)    |
| N3  | C11 | C12 | C17 | 0.1(6)    | C12 | C13 | C14 | C18 | 178.9(4)  |
| N3  | C11 | C16 | C15 | -179.0(4) | C13 | C14 | C15 | C16 | 0.7(7)    |
| N3  | C11 | C16 | C19 | 1.3(6)    | C14 | C15 | C16 | C11 | -2.0(7)   |
| C1  | C2  | C3  | C4  | 1.6(7)    | C14 | C15 | C16 | C19 | 177.7(4)  |
| C1  | C6  | C7  | N2  | 76.7(5)   | C16 | C11 | C12 | C13 | -1.3(6)   |

|    |    |    |     |           |     |     |     |     |           |
|----|----|----|-----|-----------|-----|-----|-----|-----|-----------|
| C2 | C1 | C6 | C5  | 0.3(6)    | C16 | C11 | C12 | C17 | 178.8(4)  |
| C2 | C1 | C6 | C7  | -177.8(4) | C17 | C12 | C13 | C14 | 179.8(4)  |
| C2 | C3 | C4 | N1  | 179.4(4)  | C18 | C14 | C15 | C16 | -177.8(4) |
| C2 | C3 | C4 | C5  | -0.3(7)   | C20 | C21 | C22 | C23 | -45.5(7)  |
| C3 | C4 | C5 | C6  | -1.0(7)   | C21 | C20 | C27 | C26 | 91.0(5)   |
| C4 | C5 | C6 | C1  | 0.9(7)    | C21 | C22 | C23 | C24 | -31.8(6)  |
| C4 | C5 | C6 | C7  | 179.0(4)  | C22 | C23 | C24 | Ir1 | 14.0(6)   |
| C5 | C6 | C7 | N2  | -101.4(5) | C22 | C23 | C24 | C25 | 95.7(5)   |
| C6 | C1 | C2 | C3  | -1.6(7)   | C23 | C24 | C25 | Ir1 | -104.9(4) |
| C7 | N2 | C8 | Ir1 | -19.2(5)  | C23 | C24 | C25 | C26 | -1.8(6)   |
| C7 | N2 | C8 | N3  | 168.3(4)  | C24 | C25 | C26 | C27 | -52.2(6)  |
| C7 | N2 | C9 | C10 | -168.5(4) | C25 | C26 | C27 | C20 | -25.8(6)  |
| C8 | N2 | C7 | C6  | -71.3(5)  | C27 | C20 | C21 | Ir1 | -106.9(4) |
| C8 | N2 | C9 | C10 | 0.2(5)    | C27 | C20 | C21 | C22 | -3.9(7)   |

*Table S10. Hydrogen Atom Coordinates ( $\text{\AA}\times 10^4$ ) and Isotropic Displacement Parameters ( $\text{\AA}^2\times 10^3$ ) for 1*

| Atom | x    | y    | z     | U(eq) |
|------|------|------|-------|-------|
| H2   | 7731 | 2606 | 7889  | 29    |
| H3   | 8872 | 3601 | 8474  | 33    |
| H5   | 4715 | 4442 | 8973  | 24    |
| H7A  | 2445 | 3915 | 8407  | 22    |
| H7B  | 2532 | 3251 | 7724  | 22    |
| H9   | 1638 | 3717 | 10188 | 19    |
| H10  | 1425 | 2694 | 11243 | 20    |
| H13  | 548  | 139  | 11285 | 21    |
| H15  | 5104 | 372  | 11010 | 24    |

|      |       |      |       |    |
|------|-------|------|-------|----|
| H17A | -1181 | 938  | 10605 | 33 |
| H17B | -555  | 1575 | 9994  | 33 |
| H17C | -697  | 1637 | 11137 | 33 |
| H18A | 4107  | -740 | 11476 | 39 |
| H18B | 2307  | -877 | 11402 | 39 |
| H18C | 3021  | -533 | 12350 | 39 |
| H19A | 6200  | 1393 | 10477 | 39 |
| H19B | 5223  | 2073 | 10686 | 39 |
| H19C | 5229  | 1745 | 9630  | 39 |
| H20  | 1452  | 845  | 8877  | 20 |
| H21  | 28    | 1754 | 8387  | 20 |
| H22A | -395  | 2095 | 6785  | 27 |
| H22B | -943  | 1309 | 6813  | 27 |
| H23A | 1022  | 940  | 5921  | 24 |
| H23B | 810   | 1696 | 5481  | 24 |
| H24  | 3204  | 1966 | 5930  | 26 |
| H25  | 4820  | 1196 | 6544  | 19 |
| H26A | 4133  | 160  | 7278  | 23 |
| H26B | 3111  | 152  | 6319  | 23 |
| H27A | 940   | 267  | 7113  | 25 |
| H27B | 1915  | -82  | 7958  | 25 |

*Table S11. Atomic Occupancy for 1*

| <b>Atom</b> | <b>Occupancy</b> |
|-------------|------------------|
| Ir1A        | 0.0418(12)       |

## 4. Reactivity of **1** towards hydrogen and pyridine

### Activation of **1** with hydrogen to form **2**

Reaction of **1** with H<sub>2</sub> proceeds according to Figure S10 to form **2**. Figure S11 portrays a series of <sup>1</sup>H NMR spectra showing how the activation step can be controlled by temperature and confirms that **2** is highly fluxional.

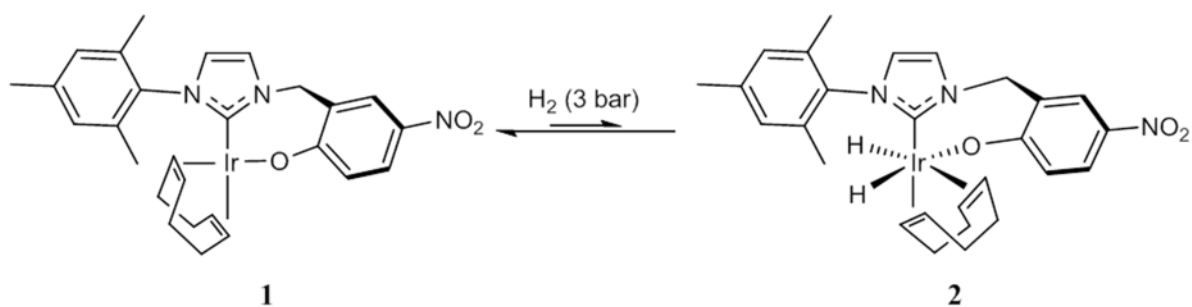

*Figure S10. Structure of **2** (overall 5% yield) which demonstrates reversible hydrogen addition and results from the oxidative addition of H<sub>2</sub> to **1** in CD<sub>2</sub>Cl<sub>2</sub> at 253 K*

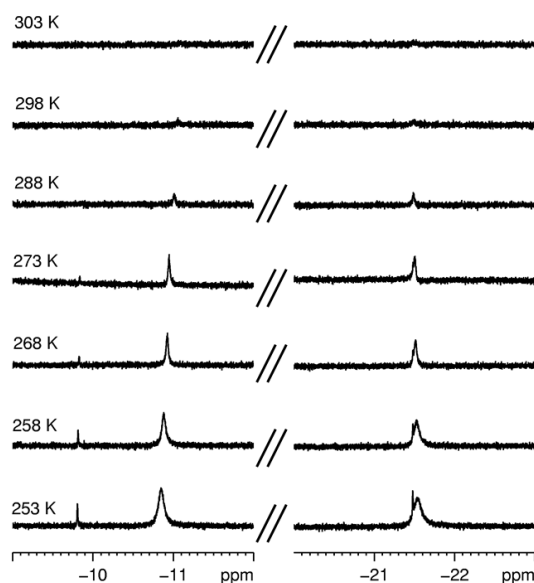

*Figure S11. Hydride region of **1** in the presence of hydrogen*

### Addition of pyridine and hydrogen and analysis of the active complex, **3**

When **1** reacts with pyridine and H<sub>2</sub>, a new product, **3** is formed. Figure S12 shows how this reaction results in the loss of signals for **1** and the growth of **3** over a time course of 17 days as detailed in Table S12. Figure S13 shows the structure of **3** and Table S13 details the characterization data with Figure S14 showing how NOESY NMR spectroscopy was used to aid these assignments.

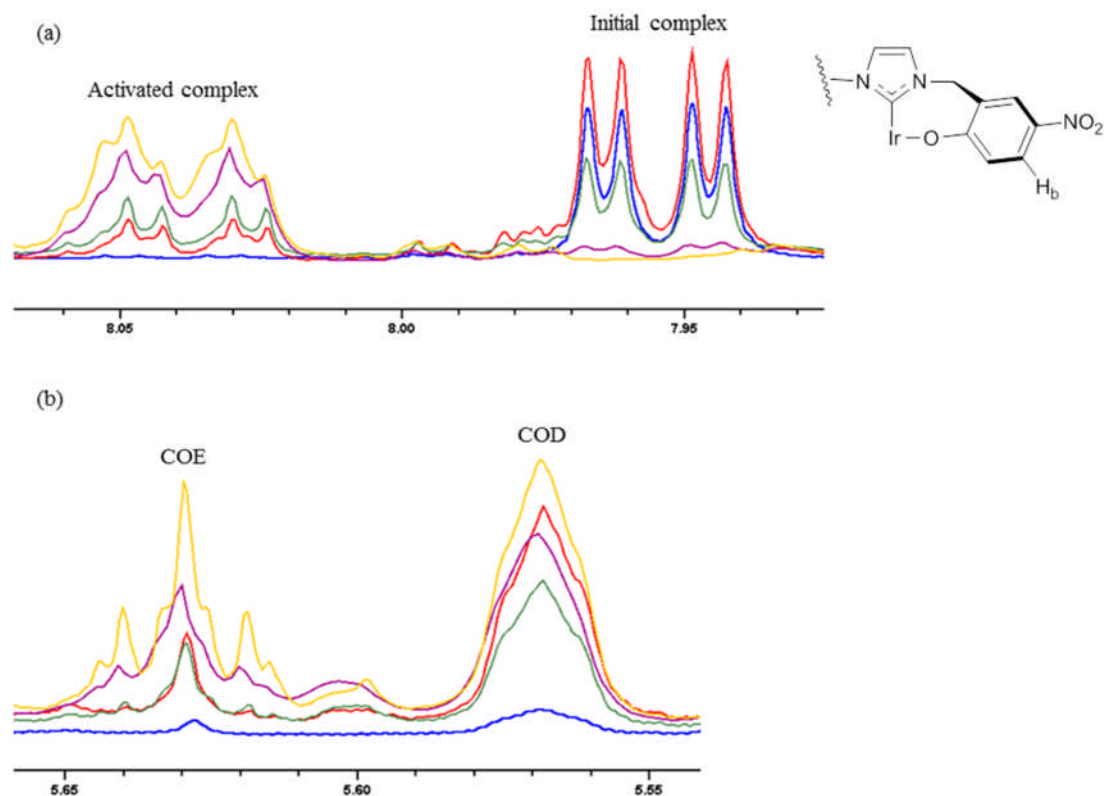

Figure S12. Evolution of spectra as **1** undergoes slow activation to **3** and releases COD into solution, showing (a) carbene H<sub>b</sub> signal and (b) COD and COE

Table S12. Ratios showing how the concentrations of cyclooctadiene, cyclooctene, initial carbene and activated carbene vary over time

|                        | Integrals during activation  |                                 | Complex percentages (%)                               |                                                         |
|------------------------|------------------------------|---------------------------------|-------------------------------------------------------|---------------------------------------------------------|
|                        | Free COD<br>( $\delta$ 5.57) | Cyclooctene<br>( $\delta$ 5.63) | Initial complex H <sub>b</sub><br>dd ( $\delta$ 7.95) | Activated complex<br>H <sub>b</sub> dd ( $\delta$ 8.04) |
| <b>Initial complex</b> | 0.168                        | 0.064                           | 100                                                   | 0                                                       |
| <b>6 hours</b>         | 0.817                        | 0.278                           | 78                                                    | 22                                                      |
| <b>24 hours</b>        | 1.307                        | 0.630                           | 60                                                    | 40                                                      |



|         |       |       |    |     |
|---------|-------|-------|----|-----|
| 6 days  | 1.581 | 1.128 | 25 | 75  |
| 17 days | 2.012 | 1.517 | 0  | 100 |

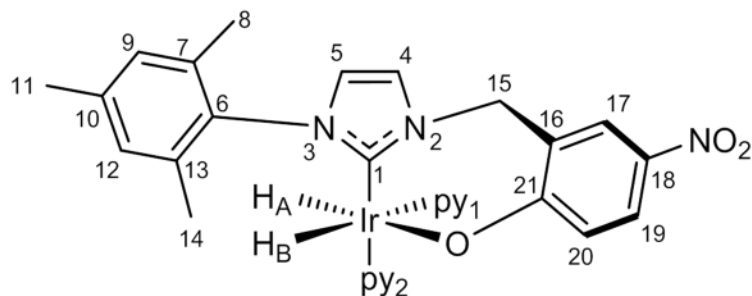

Figure S13. Active complex,  $3_A$ , with assignments

Table S13. Characterisation data for  $3_A$  with pyridine and hydrogen in  $CD_2Cl_2$  at 233 K (NMR, 500 MHz)

| Position | $^1H$ $\delta$ / ppm         | $^{13}C\{^1H\}$ $\delta$ / ppm | $^{15}N$ $\delta$ / ppm |
|----------|------------------------------|--------------------------------|-------------------------|
| 1        |                              | 175.5                          |                         |
| 2        |                              |                                | 190.9                   |
| 3        |                              |                                | 192.5                   |
| 4        | 7.19, d, $^3J(HH) = 1.48$ Hz | 120.0                          |                         |
| 5        | 6.61, d, $^3J(HH) = 1.48$ Hz | 120.5                          |                         |
| 6        |                              | 137.9                          |                         |
| 7        |                              | 137.0                          |                         |
| 8        | 2.31, s                      | 21.0                           |                         |
| 9        | 6.46, s                      | 128.1                          |                         |
| 10       |                              | 136.0                          |                         |
| 11       | 0.93, s                      | 16.6                           |                         |
| 12       | 7.01, s                      | 128.7                          |                         |
| 13       |                              | 136.5                          |                         |
| 14       | 2.16, s                      | 25.3                           |                         |

|                                 |                                                                                   |                     |       |
|---------------------------------|-----------------------------------------------------------------------------------|---------------------|-------|
| 15                              | 4.46, 6.48, both d,<br>$^2J(\text{HH}) = 13.55 \text{ Hz}$                        | 51.7                |       |
| 16                              |                                                                                   | 124.8               |       |
| 17                              | 8.17, d, $^4J(\text{HH}) = 2.82 \text{ Hz}$                                       | 127.2               |       |
| 18                              |                                                                                   | 132.3               |       |
| 19                              | 8.04, dd, $^4J(\text{HH}) = 2.82 \text{ Hz}$ , $^3J(\text{HH}) = 9.04 \text{ Hz}$ | 126.9               |       |
| 20                              | 6.69, d, $^3J(\text{HH}) = 9.04 \text{ Hz}$                                       | 122.2               |       |
| 21                              |                                                                                   | 177.7               |       |
| H <sub>A</sub>                  | -21.4, d, $^2J(\text{HH}) = 8.90 \text{ Hz}$                                      |                     |       |
| H <sub>B</sub>                  | -28.9, d, $^2J(\text{HH}) = 8.90 \text{ Hz}$                                      |                     |       |
| py <sub>eq</sub> <i>o, m, p</i> | 8.13, 6.92, 7.60, all m                                                           | 152.8, 124.5, 135.5 | 258.4 |
| py <sub>ax</sub> <i>o, m, p</i> | 8.92, 7.11, 7.66, all m                                                           | 154.6, 124.7, 135.8 | 240.7 |

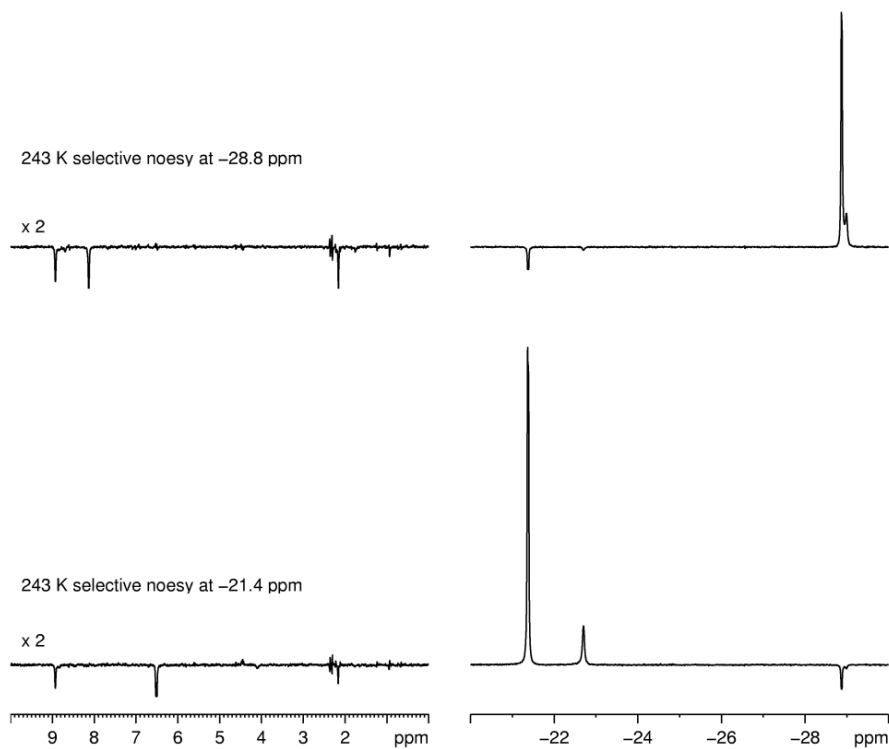

**Figure S14. EXSY spectra at 243 K showing coupling between the hydrides and bound pyridine.  $H_A$  shows an NOE interaction with the  $py_{ax}$  ortho  $^1H$  signal and  $H_B$  shows an NOE interaction with the  $py_{ax}$  ortho  $^1H$  signal as well as the  $py_{eq}$  ortho  $^1H$  signal. No exchange is observed at 243 K between the hydrides and free hydrogen**

## UV-Vis analysis

**1** has a strong yellow/orange colour when in solution which is retained upon activation with pyridine and H<sub>2</sub>. UV-vis analysis of **1** in DCM gives a strong absorption band at 405.5 nm. From this, the molar absorption coefficient,  $\epsilon$ , can be calculated using the absorbance of a solution of known concentration.

$$A = \epsilon cl$$

where:  $A$  = absorbance

$$\epsilon = \text{molar absorption coefficient} / \text{dm}^3 \text{ mol}^{-1} \text{ cm}^{-1}$$

$$l = \text{cell path length} / 1 \text{ cm}$$

For a DCM solution of **1** the value of  $\epsilon$  was calculated to be  $21060 \text{ dm}^3 \text{ mol}^{-1} \text{ cm}^{-1}$ .

$$\epsilon = \frac{0.4965}{2.36 \times 10^{-5} \text{ mol dm}^{-3} \times 1 \text{ cm}} = 21060 \text{ dm}^3 \text{ mol}^{-1} \text{ cm}^{-1}$$

Analysis of the activated complex, **3**, gives a strong absorption band at 398.6 nm with  $\epsilon = 10975 \text{ dm}^3 \text{ mol}^{-1} \text{ cm}^{-1}$ .

$$\epsilon = \frac{0.5180}{4.72 \times 10^{-5} \text{ mol dm}^{-3} \times 1 \text{ cm}} = 10975 \text{ dm}^3 \text{ mol}^{-1} \text{ cm}^{-1}$$

These values are consistent with the intense colour being caused by a charge transfer band. Figure S15 shows the UV-vis spectra and demonstrates that pyridine does not absorb in the region between 350 and 450 nm and therefore the absorption band in **3** is due to the complex itself and not excess pyridine in solution.

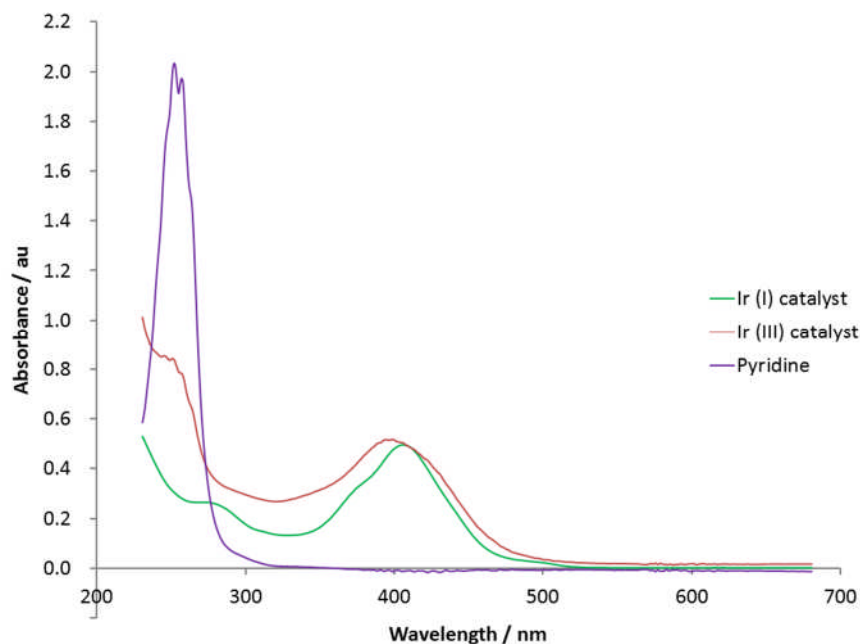

*Figure S15. UV-vis spectra of **1**, **3** and pyridine in DCM*

The UV-vis spectra of **1** and **3** can be compared to that of **4** which is yellow when dissolved in methanol, with an absorption band at 427.0 nm and an absorption of 0.1419 for a solution of concentration equal to  $6.87 \times 10^{-5} \text{ mol dm}^{-3}$ .

$$\epsilon = \frac{0.1419}{6.87 \times 10^{-5} \text{ mol dm}^{-3} \times 1 \text{ cm}} = 2065 \text{ dm}^3 \text{ mol}^{-1} \text{ cm}^{-1}$$

Upon activation of **4** to  $[\text{Ir}(\text{IMes})(\text{H})_2(\text{py})_3]\text{Cl}$  in methanol, the bright yellow colour disappears and instead the solution appears to have only a very faint yellow tinge. Analysis of the activated complex,  $[\text{Ir}(\text{IMes})(\text{H})_2(\text{py})_3]\text{Cl}$ , at 427.0 nm gives an absorption of 0.0144 with an absorption coefficient of  $230 \text{ dm}^3 \text{ mol}^{-1} \text{ cm}^{-1}$ . This much lower absorption coefficient is expected because the solution no longer absorbs in the visible region so no longer appears colored.

$$\epsilon = \frac{0.0144}{6.25 \times 10^{-5} \text{ mol dm}^{-3} \times 1 \text{ cm}} = 230 \text{ dm}^3 \text{ mol}^{-1} \text{ cm}^{-1}$$

Now, the maximum absorption is shifted into the UV region of the spectrum as shown in Figure S16 and a very broad signal appears at approximately 341.0 nm with an absorbance of 0.2133 and a  $\epsilon$  of  $3413 \text{ dm}^3 \text{ mol}^{-1} \text{ cm}^{-1}$  which is much larger than at 427.0 nm.

$$\epsilon = \frac{0.2133}{6.25 \times 10^{-5} \text{ mol dm}^{-3} \times 1 \text{ cm}} = 3413 \text{ dm}^3 \text{ mol}^{-1} \text{ cm}^{-1}$$

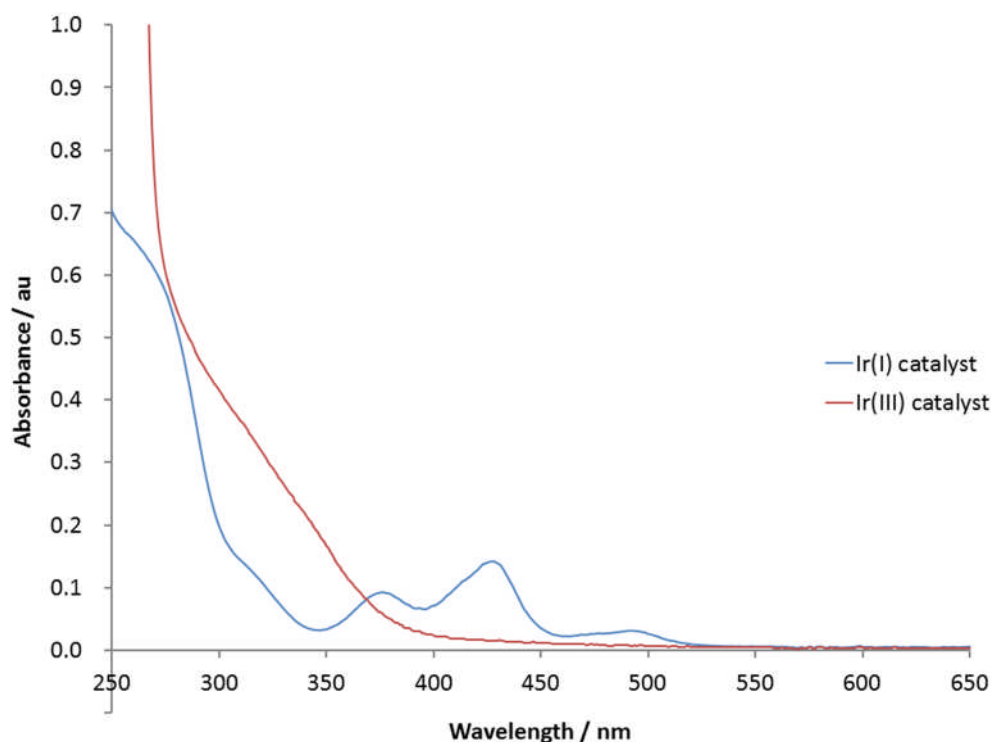

**Figure S16.** UV-vis spectra of **4** and  $[\text{Ir}(\text{IMes})(\text{H})_2(\text{py})_3]\text{Cl}$  in methanol

## IR data

The overlay IR spectra of  $L_1HBr$ , **1** and **3** in Figure S17 shows that only the free carbene contains an O-H bending mode whilst the silver and iridium complexes do not have this signal, demonstrating that the phenolate remains bound to the metal centre.

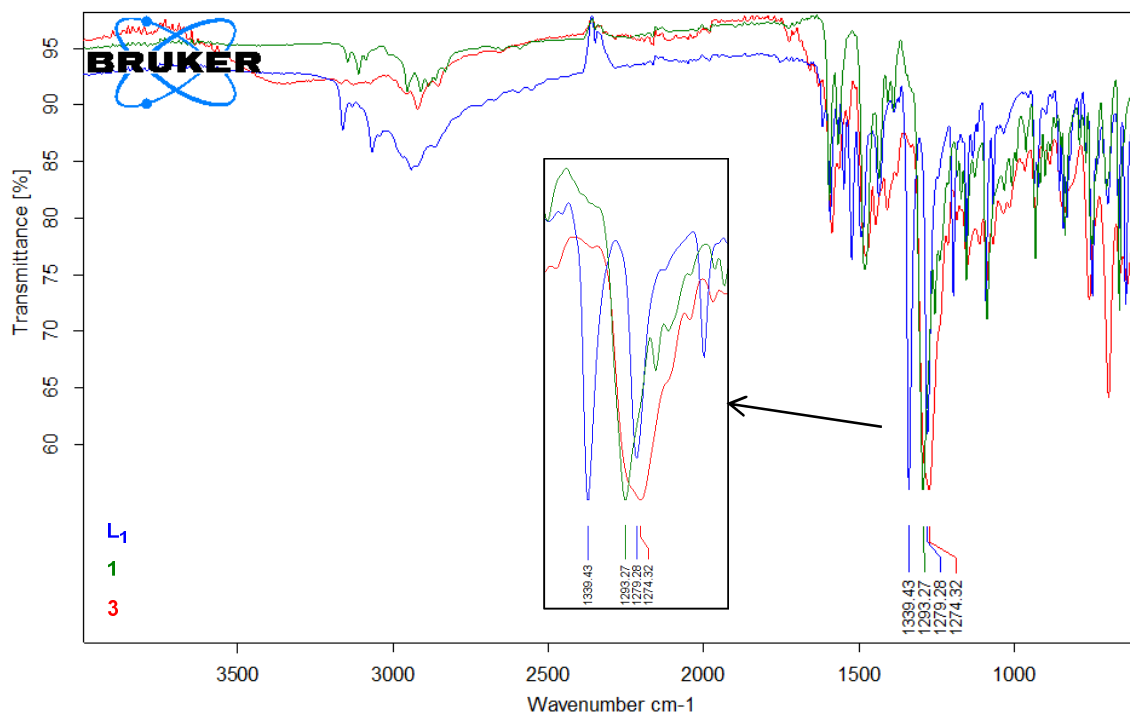

*Figure S17. Comparison of the IR spectra of  $L_1HBr$ , **1** and **3***

### Lineshape analysis of the hydride exchange using Topspin DNMR program

At 298 K, in CD<sub>2</sub>Cl<sub>2</sub> two hydrides signals for **3** are present at  $\delta$  -28.8 and -21.4. On cooling, these two hydride resonances split and another pair of hydride signals evolve, so that the major isomer appears at  $\delta$  -21.35 and -28.88 and the minor isomer appears at  $\delta$  -22.68 and -29.02. This is due to a conformational isomer because of the seven-membered metallocycle which gives rise to an endo and exo seven-membered ring. This behaviour is illustrated in Figure S18.

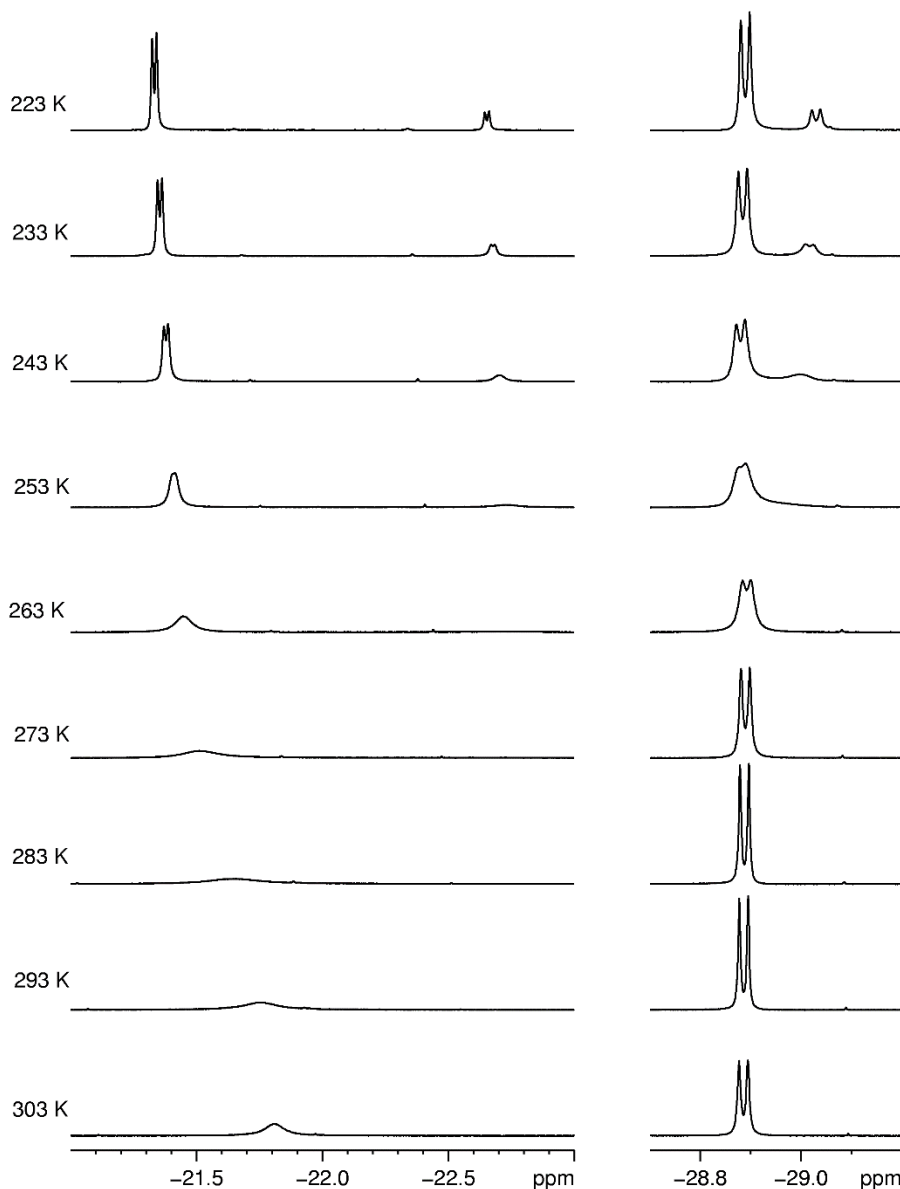

**Figure S18.** <sup>1</sup>H NMR spectra showing conformer separation upon decreasing temperature from 303 K to 223 K

The dynamic behaviour of **3** has been probed. EXSY experiments at 233 K enabled rates of exchange to be calculated between H<sub>A</sub> (major isomer) and H<sub>A'</sub> (minor isomer). At 233K, the two sets of hydride resonances appear at  $\delta$  -21.35 (H<sub>A</sub>) and -29.88 (H<sub>B</sub>), and at  $\delta$  -22.68 (H<sub>A'</sub>) and -29.02 (H<sub>B'</sub>) with  $J_{AB}$  and  $J_{A'B'}$  being 8.9 and 7.3 Hz respectively. The exchange rates could not be calculated for the exchange between H<sub>B</sub> and H<sub>B'</sub> because the chemical shift difference between the two hydride peaks was too small. Using EXSY experiments, the exchange rate for conversion of H<sub>A</sub> into H<sub>A'</sub> was calculated to be

$4.00 \pm 0.08 \text{ s}^{-1}$  and the exchange rate for conversion of  $H_{A'}$  into  $H_A$  was calculated to be  $19.83 \pm 0.33 \text{ s}^{-1}$ . Table S14 and Figures S19 and S20 show the data for this exchange.

*Table S14. Data for percentage conversion between each isomer when selectively exciting each hydride*

| Selective irradiation | $\delta$ -21.35 |                | $\delta$ -22.68 |                |
|-----------------------|-----------------|----------------|-----------------|----------------|
|                       | $[H_A]$ / %     | $[H_{A'}]$ / % | $[H_A]$ / %     | $[H_{A'}]$ / % |
| 0.005                 | 97.91           | 2.10           | 90.37           | 9.63           |
| 0.010                 | 96.19           | 3.81           | 82.90           | 17.10          |
| 0.050                 | 88.42           | 11.58          | 43.77           | 56.23          |
| 0.070                 | 86.38           | 13.62          | 33.73           | 66.27          |
| 0.100                 | 85.01           | 14.99          | 26.70           | 73.30          |
| 0.150                 | 83.97           | 16.03          | 22.60           | 77.40          |
| 0.200                 | 83.76           | 16.24          | 21.21           | 78.79          |
| 0.250                 | 83.54           | 16.46          | 20.76           | 79.24          |
| 0.300                 | 83.57           | 16.43          | 20.42           | 79.58          |
| 0.350                 | 83.59           | 16.41          | 20.75           | 79.25          |

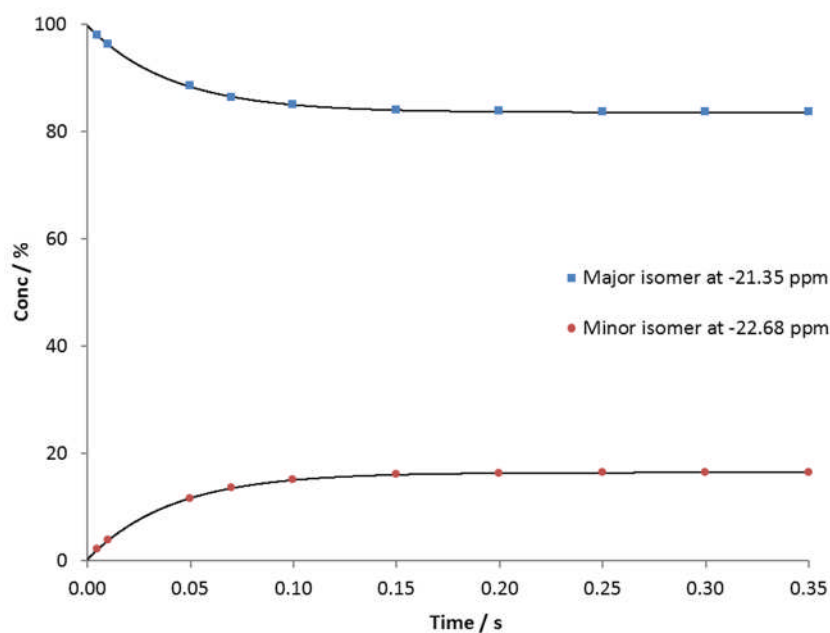

*Figure S19. Conversion from  $H_A$  to  $H_{A'}$  on selective excitation of  $H_A$*



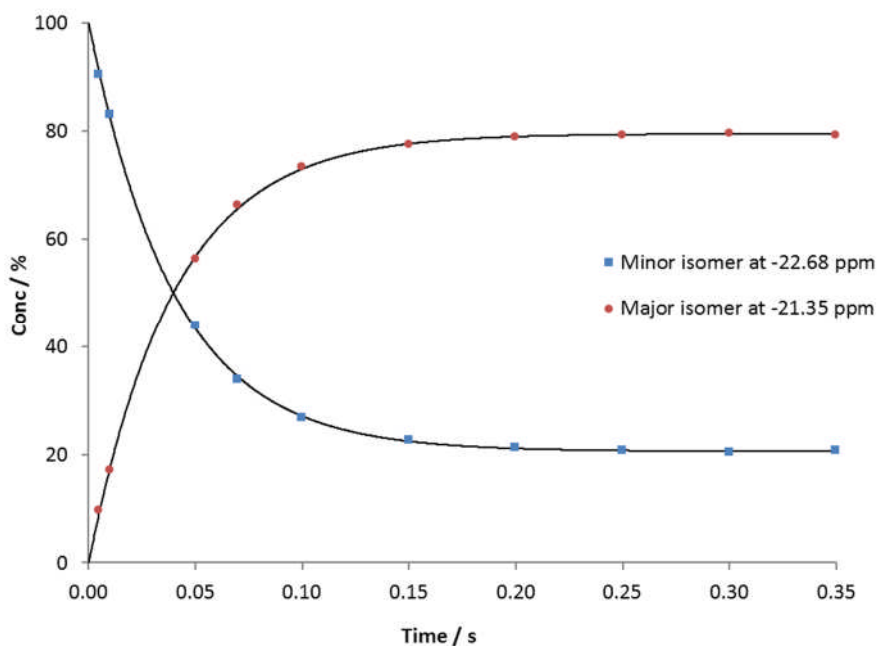

**Figure S20.** Conversion from  $H_{A'}$  to  $H_A$  on selective excitation of  $H_{A'}$

Using lineshape analysis the rate of exchange between each conformer can be estimated. Fitting each spectrum to the four lowest temperatures within the range studied, enabled the determination of rate constants at each temperature and an estimate of the activation energy using the Arrhenius equation and the Eyring-Polanyi equation as described before. Table S15 shows the simulated exchange rate values obtained, with the corresponding Arrhenius and Eyring-Polanyi plots in Figures S21 and S22 and the activation parameters summarized in Table S16.

$$H_A = \delta -21.35$$

$$H_{A'} = \delta -22.68$$

$$H_B = \delta -28.88$$

$$H_{B'} = \delta -29.02$$

Lineshape analysis on the exchanging hydrides at 223, 233 and 243 K proved possible when setting  $H_A$  and  $H_{A'}$  to be exchanging and  $H_B$  and  $H_{B'}$  to be exchanging. This generated spectra with a 96 % agreement level (data set A). When trying to simulate the data for the spectrum at 253 K the simulation program could not produce an accurate spectrum at 96 % agreement due to coalescence of the hydride peaks at  $\delta \sim -29.0$ . When these hydrides were set to be exchanging (data set B), the highest value that was obtained was  $\sim 85$  %. If these two overlapping hydrides were set to not be exchanging (data set C) then a 96 % agreement level was reached.

*Table S15. Simulated rate constants at the four lowest temperatures for each data set for hydride exchange*

| Temperature / K | Simulated rate for data set A / s <sup>-1</sup> | Simulated rate for data set B / s <sup>-1</sup> | Simulated rate for data set C / s <sup>-1</sup> |
|-----------------|-------------------------------------------------|-------------------------------------------------|-------------------------------------------------|
| 223             | 0.64 ± 0.03                                     | 0.64 ± 0.03                                     | 0.64 ± 0.03                                     |
| 233             | 2.27 ± 0.09                                     | 2.27 ± 0.09                                     | 2.27 ± 0.09                                     |
| 243             | 5.59 ± 0.22                                     | 5.59 ± 0.22                                     | 5.59 ± 0.22                                     |
| 253             | -                                               | 15.72 ± 2.36                                    | 11.47 ± 0.46                                    |

Data sets:

A: 96 % agreement level for each hydride for the lowest 3 temperatures

B: 96 % agreement level for 223, 233 and 243 K and 85 % for 253 K ( $\delta$  -29 hydrides set to be exchanging)

C: 96 % agreement level for all temperatures ( $\delta$  -29 hydrides set to not be exchanging)

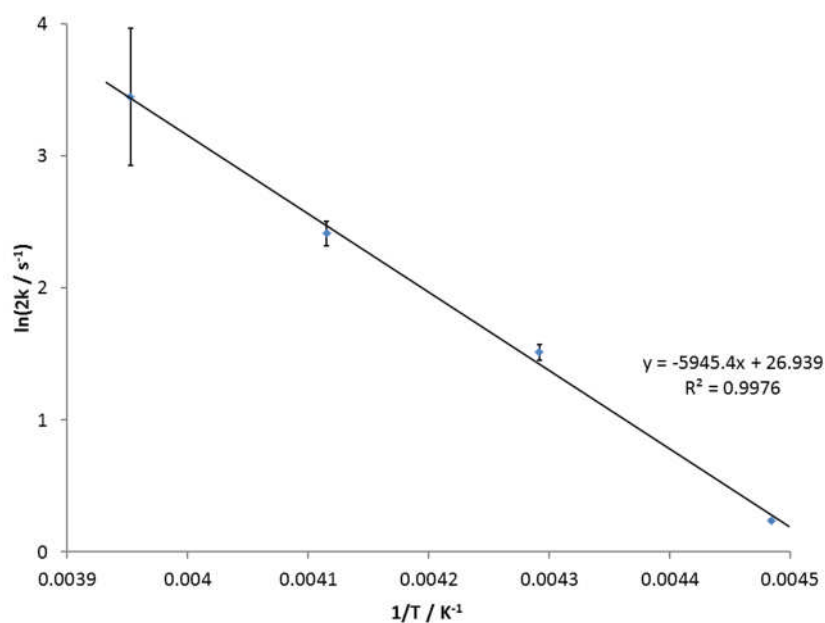

*Figure S21. Arrhenius plot of the simulated hydride exchange rates using data set B*

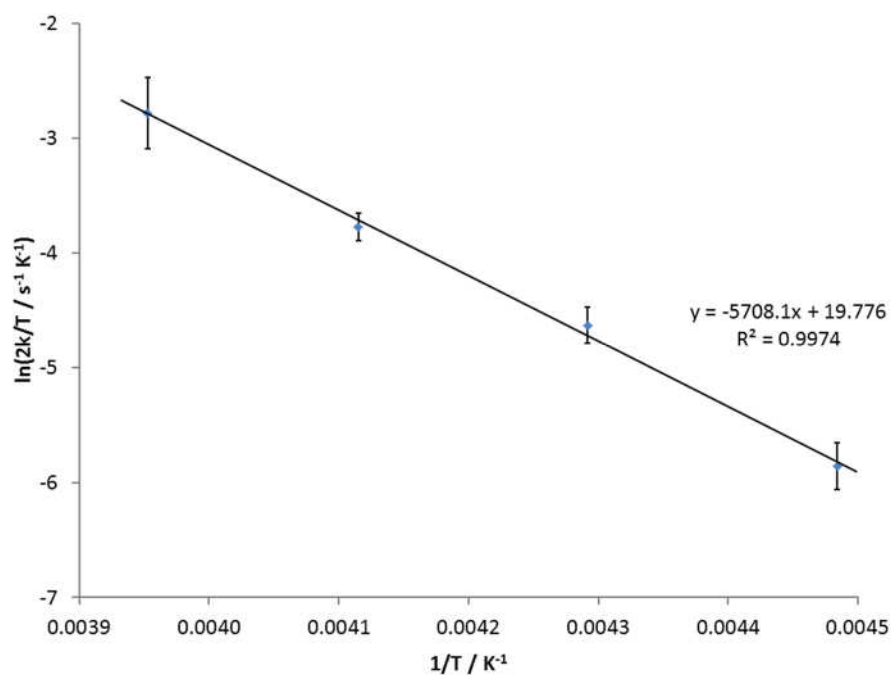

Figure S22. Eyring-Polanyi plot of the simulated hydride exchange rates using data set B

Table S16. Summary of activation parameters for the simulated data for the hydride exchange

| Equation used  | Data set | Activation energy ( $E_a/\Delta H^\ddagger$ ) / $\text{kJ mol}^{-1}$ | Graph $R^2$ value | Activation entropy ( $\Delta S^\ddagger$ ) / $\text{J K}^{-1} \text{mol}^{-1}$ | $\Delta G$ (300 K) / $\text{J mol}^{-1}$ |
|----------------|----------|----------------------------------------------------------------------|-------------------|--------------------------------------------------------------------------------|------------------------------------------|
| Arrhenius      | A        | $49.1 \pm 7.3$                                                       | 0.9946            | -                                                                              | -                                        |
|                | B        | $49.4 \pm 1.8$                                                       | 0.9976            | -                                                                              | -                                        |
|                | C        | $45.1 \pm 5.8$                                                       | 0.9914            | -                                                                              | -                                        |
| Eyring-Polanyi | A        | $47.2 \pm 7.3$                                                       | 0.9940            | $-28.7 \pm 31.5$                                                               | $55.8 \pm 0.50$                          |
|                | B        | $47.5 \pm 1.8$                                                       | 0.9974            | $-27.4 \pm 7.5$                                                                | $55.7 \pm 0.65$                          |
|                | C        | $43.1 \pm 5.9$                                                       | 0.9904            | $-46.2 \pm 24.5$                                                               | $57.0 \pm 1.1$                           |

## 5. Exchange properties of **3** relating to SABRE

In order to explore the ligand exchange characteristics of **3** it is necessary to complete a series of variable temperature and concentration studies to explore the mechanism of these exchange pathways. We first consider pyridine and H<sub>2</sub> exchange at 298 K before examining the effect of increasing pyridine concentration in CD<sub>2</sub>Cl<sub>2</sub>. When changing to methanol an additional H-D exchange process is observed and as a consequence both H<sub>2</sub> loss and pyridine exchange are followed in MeOH-*d*<sub>3</sub>. A variable temperature study is also conducted to determine appropriate activation parameters. This kinetic analysis is followed by an extension to examine the effect of increasing pyridine concentration in methanol. These results are detailed in Figures S23 – S32 and Tables S17 – S26.

### Pyridine exchange rates in CD<sub>2</sub>Cl<sub>2</sub>

Exchange rates between free pyridine and both the axial and equatorial pyridine sites were calculated in CD<sub>2</sub>Cl<sub>2</sub> at 298 K. It was found that only the equatorial pyridine exchanged with free pyridine on the NMR timescale. The experimental dissociation rate constant was calculated to be  $0.28 \pm 0.03 \text{ s}^{-1}$  for a sample containing a 25-fold excess of pyridine compared to catalyst.

*Table S17. Data for percentage incorporation of free pyridine into bound pyridine*

| Mixing time / sec | [Equatorial bound pyridine] / % | [Free pyridine] / % |
|-------------------|---------------------------------|---------------------|
| 0.05              | 98.45                           | 1.55                |
| 0.10              | 96.98                           | 3.02                |
| 0.20              | 94.76                           | 5.24                |
| 0.30              | 93.19                           | 6.81                |
| 0.40              | 92.19                           | 7.81                |
| 0.50              | 91.40                           | 8.60                |
| 0.60              | 89.97                           | 10.03               |
| 0.70              | 89.15                           | 10.85               |
| 0.80              | 88.77                           | 11.23               |
| 0.90              | 88.12                           | 11.88               |

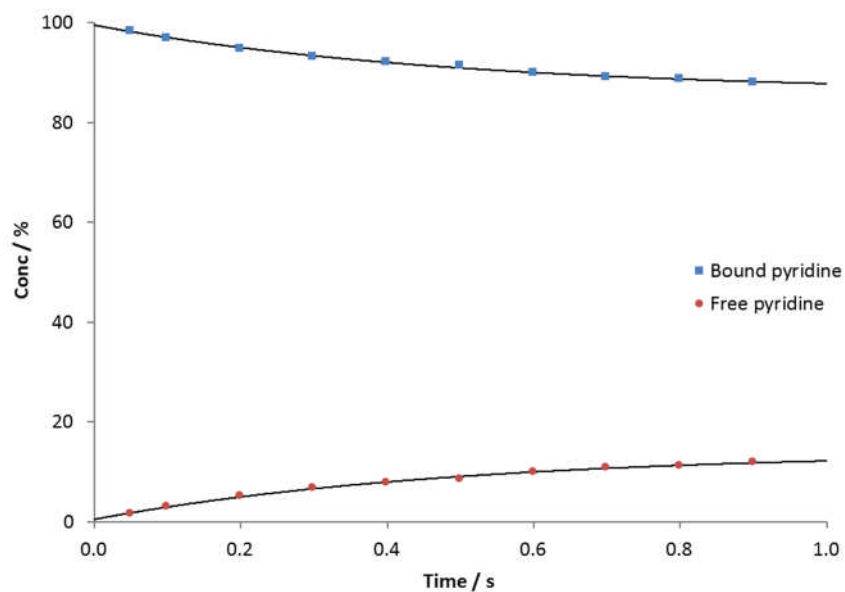

Figure S23. Equatorial and free pyridine exchange for the bound pyridine at  $\delta$  8.31 at 298 K in 3

### Hydride-hydrogen exchange at 298 K in $\text{CD}_2\text{Cl}_2$

At 298 K the two hydrides undergo exchange. The hydride signal at  $\delta$  -28.9 was selectively excited although the hydride signal at  $\delta$  -21.8 was much broader so was not able to be selectively excited. The data shown is for a sample containing a 25-fold excess of pyridine compared to catalyst.

Table S18. Data for percentage incorporation from the hydride at  $\delta$  -28.9 into the hydride at  $\delta$  -21.8 and free  $\text{H}_2$

| Mixing time / sec | [ $\delta$ -28.9 hydride (A)] / % | [ $\delta$ -21.8 hydride (B)] / % | [ $\text{H}_2$ in solution (C)] / % |
|-------------------|-----------------------------------|-----------------------------------|-------------------------------------|
| 0.05              | 98.08                             | 1.75                              | 0.17                                |
| 0.10              | 93.78                             | 5.92                              | 0.30                                |
| 0.20              | 86.19                             | 12.84                             | 0.98                                |
| 0.30              | 78.83                             | 19.53                             | 1.64                                |
| 0.40              | 73.71                             | 23.97                             | 2.32                                |
| 0.50              | 69.84                             | 27.17                             | 2.99                                |
| 0.60              | 64.80                             | 31.16                             | 4.04                                |
| 0.70              | 61.63                             | 33.77                             | 4.59                                |
| 0.80              | 61.13                             | 33.01                             | 5.85                                |
| 0.90              | 58.41                             | 35.03                             | 6.56                                |

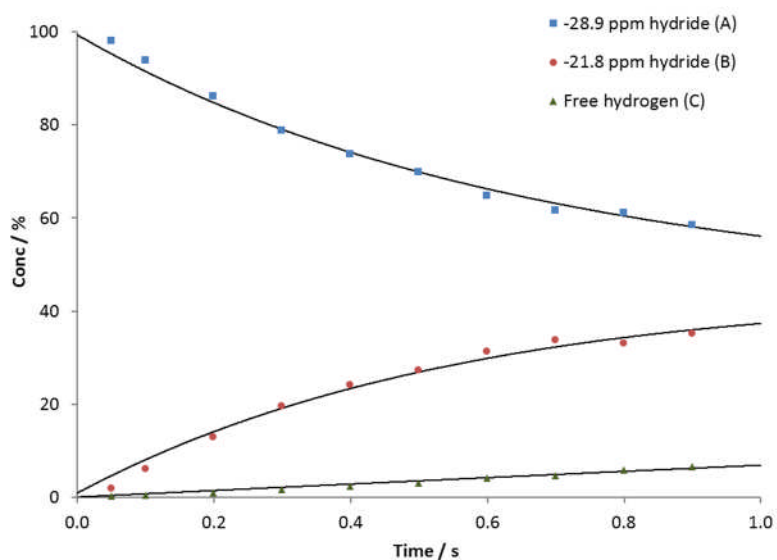

**Figure S24. Hydride and hydrogen exchange from the hydride at  $\delta$  -28.9 at 298 K in 3**

Using this data, exchange rates for the different processes can be calculated. The hydrides were shown to exchange with each other at a rate of  $0.79 \pm 0.02 \text{ s}^{-1}$  and the dissociative rate from each hydride to hydrogen was calculated to be  $0.071 \pm 0.003 \text{ s}^{-1}$ . In  $\text{CD}_2\text{Cl}_2$ , the rate of pyridine exchange was found to be independent of pyridine concentration whereas the rate constant for hydride loss decreased upon addition of pyridine. This suggests that the process follows a dissociative mechanism in dichloromethane.

**Table S19. Exchange rates and normalised exchange rates for pyridine and hydride loss**

| No. of eq. of py by NMR ratio | Rate of py loss / $\text{k} / \text{s}^{-1}$ | Normalised rate of py loss | Rate of H loss / $\text{k} / \text{s}^{-1}$ | Normalised rate of H loss |
|-------------------------------|----------------------------------------------|----------------------------|---------------------------------------------|---------------------------|
| 15                            | $0.28 \pm 0.03$                              | 0.9032                     | $0.078 \pm 0.003$                           | 1.0000                    |
| 25                            | $0.28 \pm 0.03$                              | 0.9032                     | $0.071 \pm 0.003$                           | 0.9103                    |
| 30                            | $0.31 \pm 0.01$                              | 1.0000                     | $0.053 \pm 0.002$                           | 0.6795                    |
| 50                            | $0.28 \pm 0.03$                              | 0.9032                     | $0.042 \pm 0.002$                           | 0.5385                    |

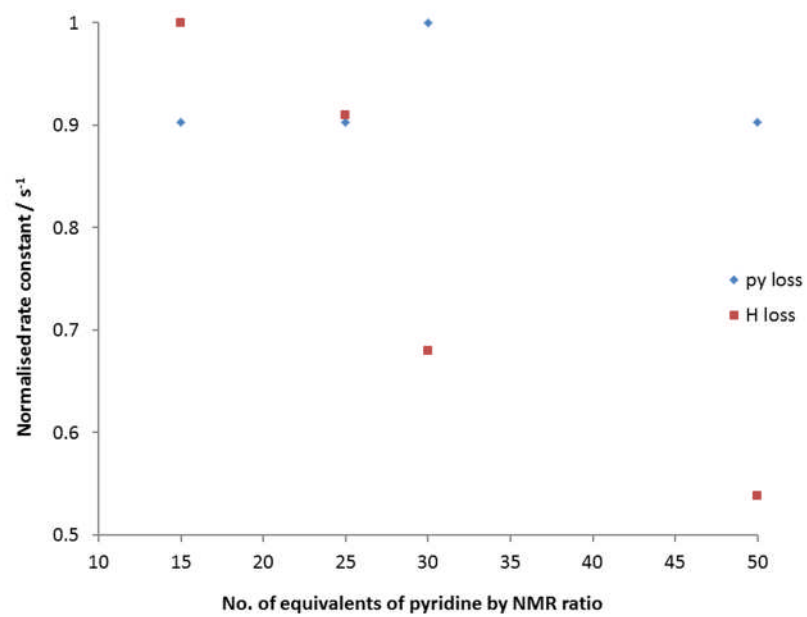

*Figure S25. The normalised rates of pyridine and hydride loss in relation to the number of equivalents of pyridine added, calculated by NMR ratio*

### Hydride-Deuterium Exchange rates in MeOD-*d*<sub>4</sub>

At 243 K, the two hydrides of the major conformer are easily visible as two doublets. However, at 243 K, **3** in MeOD-*d*<sub>4</sub> does not seem to undergo H-D exchange on the NMR timescale. An equilibrium is maintained at approximately 13 % H-D complex and 86 % H-H complex where deuteration could have occurred directly after addition of hydrogen to the sample before the sample was cooled down. At temperatures above 243 K, the hydride signal at  $\delta$  -24.7 becomes very broad and so any exchange process is not observable. At 270 K, H-D exchange of the hydride signal at  $\delta$  -29.2 occurs. The values were calculated by using the integral areas of the two signals and normalising their total value to 100 %. The H-D exchange rate was calculated to be  $4.23 \times 10^{-5} \text{ s}^{-1}$ . This shows that the exchange process is slow at low temperature. As the temperature was increased to 298 K the H-D exchange process became much faster. After 10 minutes in the spectrometer  $\sim 34$  % of the sample was deuterated, therefore in order to calculate a rate for the exchange process, it was assumed that initially the concentration of deuterated sample was 0 %. Using this data the rate of exchange was calculated to be  $8.19 \times 10^{-4} \text{ s}^{-1}$  which is  $\sim 20$  times faster than the exchange process at 270 K and therefore for every increase by 10 degrees, the rate increases by nearly 7 times.

*Table S20. Data for percentage incorporation of deuterium into the hydride at  $\delta$  -29 at 270 K*

| Time / min | [H-H] / % | [H-D] / % |
|------------|-----------|-----------|
| 0          | 92.34     | 7.66      |
| 10         | 92.82     | 7.18      |
| 20         | 90.63     | 9.37      |
| 30         | 88.30     | 11.70     |
| 40         | 87.38     | 12.62     |
| 50         | 86.13     | 13.87     |
| 60         | 82.67     | 17.33     |
| 70         | 82.15     | 17.85     |
| 80         | 80.50     | 19.50     |
| 90         | 77.70     | 22.30     |
| 100        | 76.49     | 23.51     |
| 110        | 76.37     | 23.63     |
| 120        | 75.03     | 24.97     |
| 130        | 74.29     | 25.71     |
| 140        | 72.60     | 27.40     |
| 150        | 72.82     | 27.18     |



|     |       |       |
|-----|-------|-------|
| 160 | 70.69 | 29.31 |
| 170 | 69.80 | 30.20 |
| 180 | 70.15 | 29.85 |
| 190 | 68.07 | 31.93 |
| 200 | 67.16 | 32.84 |
| 210 | 67.37 | 32.63 |
| 220 | 66.81 | 33.19 |
| 230 | 65.01 | 34.99 |
| 240 | 63.37 | 36.63 |

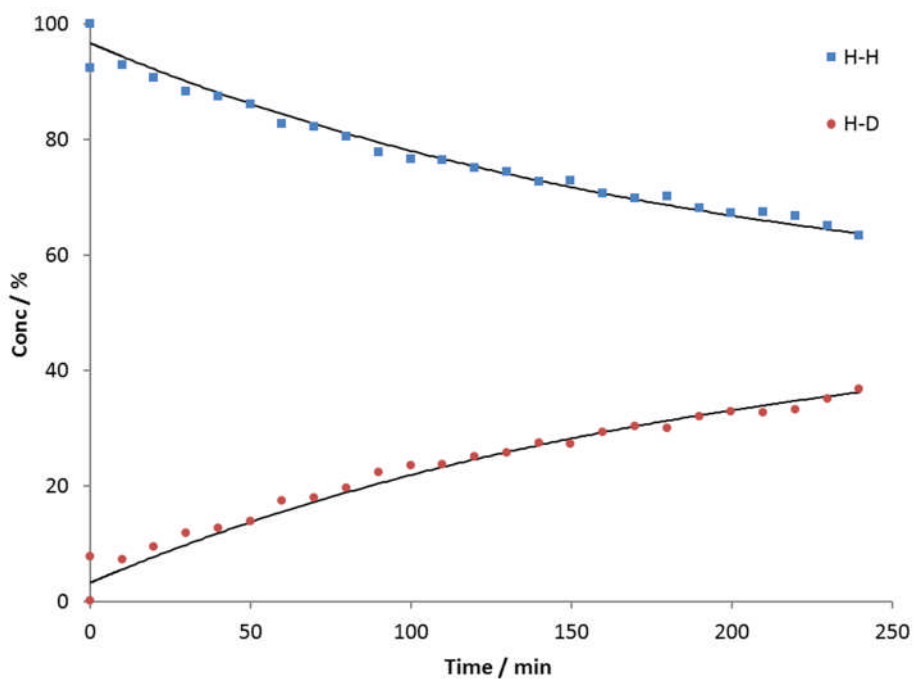

*Figure S26. Hydride and Deuterium exchange for hydride at  $\delta$  -29 at 270 K in 3*

**Table S21. Data for percentage incorporation of deuterium into the hydride at  $\delta$  -29 at 298 K**

| Time / min | [H-H] / % | [H-D] / % |
|------------|-----------|-----------|
| 0          | 100.00    | 0.00      |
| 10         | 66.16     | 33.84     |
| 20         | 45.66     | 54.34     |
| 30         | 43.70     | 56.30     |
| 40         | 39.16     | 60.84     |
| 50         | 35.10     | 64.90     |
| 60         | 33.93     | 66.07     |

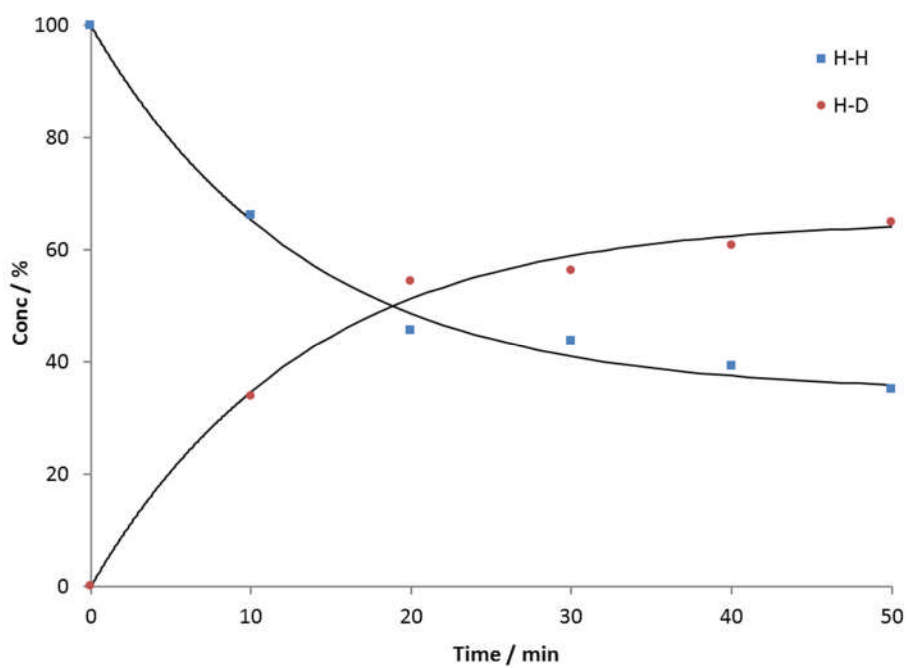

**Figure S27. Hydride and Deuterium exchange for hydride at  $\delta$  -29 at 298 K in 3**

### Pyridine exchange at 298 K in MeOH- $d_3$ (10 eq. of pyridine)

A sample of **3** in MeOH- $d_3$  containing 10 equivalents of pyridine was used to calculate exchange rates of the active catalyst because no deuteration effects occurred. It was again found that only the equatorial pyridine exchanged with free pyridine on the NMR timescale and that the axial pyridine did not exchange. The rate of dissociation was calculated to be  $0.79 \pm 0.04 \text{ s}^{-1}$ .

Table S22. Data for percentage incorporation of free pyridine into bound pyridine

| Mixing time / sec | [Equatorial bound pyridine] / % | [Free pyridine] / % |
|-------------------|---------------------------------|---------------------|
| 0.05              | 96.01                           | 3.99                |
| 0.10              | 92.55                           | 7.45                |
| 0.20              | 85.48                           | 14.52               |
| 0.30              | 79.91                           | 20.10               |
| 0.40              | 75.00                           | 25.00               |
| 0.50              | 69.01                           | 30.99               |
| 0.60              | 65.31                           | 34.69               |
| 0.70              | 60.61                           | 39.39               |
| 0.80              | 56.97                           | 43.04               |
| 0.90              | 55.30                           | 44.70               |

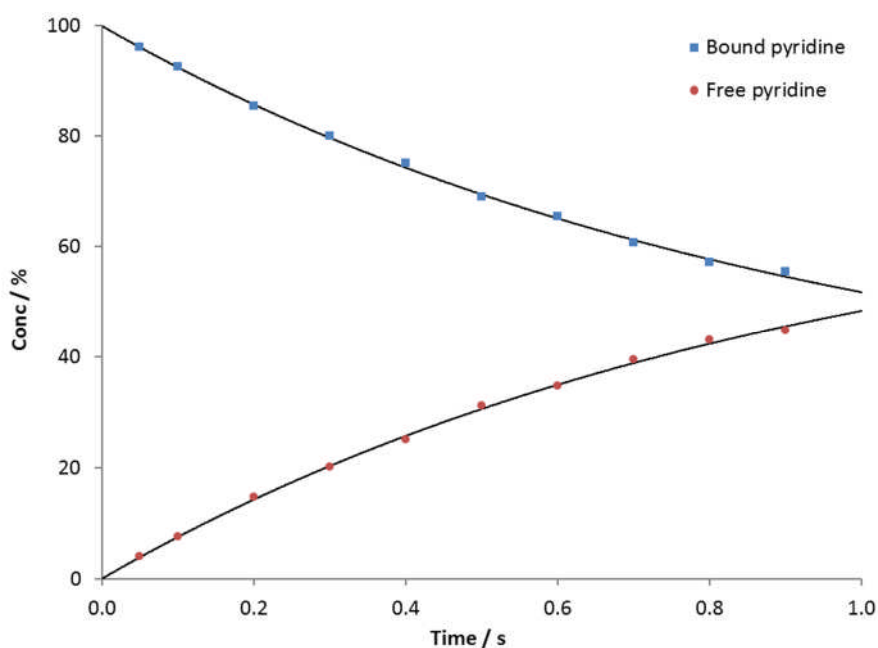

Figure S28. Equatorial and free pyridine exchange for the bound pyridine at  $\delta$  8.21 at 298 K in **3** in MeOH- $d_3$

### Hydride-hydrogen exchange at 298 K in MeOH- $d_3$ (10 eq. of pyridine)

In MeOH- $d_3$ , when the hydride at  $\delta$  -29.2 was selectively irradiated via EXSY experiments the percentage proportion of each hydride and hydrogen could be calculated after ten different mixing times from 0.05 s to 0.90 s. The rate of exchange with the other hydride at  $\delta$  -21.6 was calculated to be  $2.04 \pm 0.06 \text{ s}^{-1}$ . The dissociative rate from each hydride to hydrogen was calculated to be  $0.33 \pm 0.02 \text{ s}^{-1}$ .

Table S23. Data for percentage incorporation from the hydride at  $\delta$  -29.2 into the hydride at  $\delta$  -21.6 and free  $H_2$

| Mixing time / sec | [ $\delta$ -29.2 hydride (A)] / % | [ $\delta$ -21.6 hydride (B)] / % | [ $H_2$ in solution (C)] / % |
|-------------------|-----------------------------------|-----------------------------------|------------------------------|
| 0.05              | 89.68                             | 10.25                             | 0.07                         |
| 0.10              | 79.27                             | 18.27                             | 2.46                         |
| 0.20              | 72.51                             | 23.16                             | 4.33                         |
| 0.30              | 66.46                             | 28.05                             | 5.49                         |
| 0.40              | 62.04                             | 30.57                             | 7.39                         |
| 0.50              | 57.85                             | 32.97                             | 9.18                         |
| 0.60              | 54.85                             | 34.03                             | 11.12                        |
| 0.70              | 52.69                             | 34.27                             | 13.04                        |
| 0.80              | 50.95                             | 35.82                             | 13.23                        |
| 0.90              | 46.59                             | 34.01                             | 19.40                        |

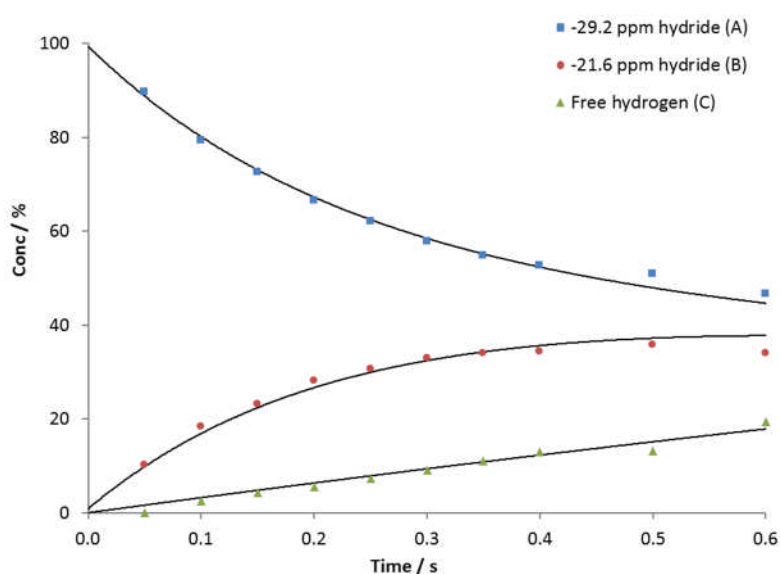

Figure S29. Hydride and hydrogen exchange from the hydride at  $\delta$  -29.2 at 298 K in 3 in MeOH- $d_3$

### Exchange rates for pyridine and hydride at 294 K in MeOH-*d*<sub>3</sub>

To determine the mechanism for exchange in MeOH-*d*<sub>3</sub> a sample of **1** in MeOH-*d*<sub>3</sub> and activated with pyridine and hydrogen was used. At each concentration of pyridine, the use of EXSY experiments enabled the percentage proportions of bound vs free pyridine and each hydride vs hydrogen to be calculated. Therefore the pyridine and hydride exchange rates could be measured at each concentration of pyridine. The experimentally determined rate constant for pyridine dissociation was found to average at  $0.78 \pm 0.03 \text{ s}^{-1}$  and the rate constants for hydride loss averaged at  $2.19 \pm 0.07 \text{ s}^{-1}$ . As the concentration of pyridine increased, the hydride dissociation loss decreased. This shows that the pathway follows a dissociative mechanism with pyridine loss occurring before hydride exchange.

Table S24. Rates of pyridine and hydride dissociation for **3** with increasing equivalents of pyridine

| Pyridine equivalents by NMR ratio | Rate of pyridine dissociation / $\text{s}^{-1}$ | Rate of hydride $\delta$ - 29.2 dissociation / $\text{s}^{-1}$ | Rate of hydride interconversion $\delta$ - 29.2 to -21.6 / $\text{s}^{-1}$ |
|-----------------------------------|-------------------------------------------------|----------------------------------------------------------------|----------------------------------------------------------------------------|
| 6                                 | $0.83 \pm 0.06$                                 | $0.850 \pm 0.110$                                              | $2.02 \pm 0.11$                                                            |
| 10                                | $0.79 \pm 0.04$                                 | $0.330 \pm 0.016$                                              | $2.05 \pm 0.06$                                                            |
| 15                                | $0.78 \pm 0.02$                                 | $0.230 \pm 0.013$                                              | $2.44 \pm 0.03$                                                            |
| 20                                | $0.80 \pm 0.02$                                 | $0.160 \pm 0.007$                                              | $2.49 \pm 0.07$                                                            |
| 25                                | $0.76 \pm 0.04$                                 | $0.092 \pm 0.002$                                              | $2.06 \pm 0.09$                                                            |
| 30                                | $0.72 \pm 0.01$                                 | $0.072 \pm 0.004$                                              | $2.07 \pm 0.08$                                                            |

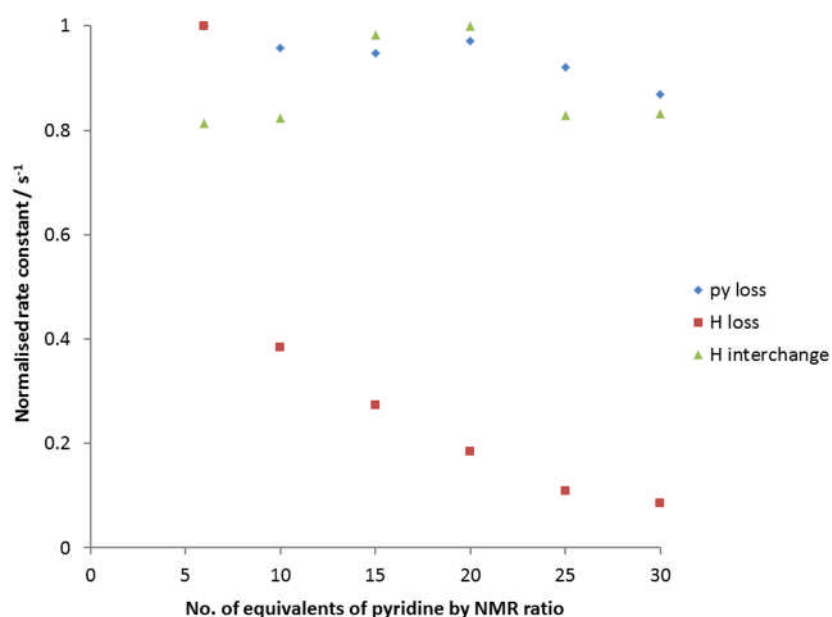

Figure S30. Normalised rates of pyridine dissociation, hydride dissociation and hydride interchange for a sample containing increasing amounts of pyridine as determined by <sup>1</sup>H NMR

### Exchange rates vs temperature in MeOH-d<sub>3</sub>

The exchange rates of bound pyridine to free pyridine and hydride to hydrogen were measured at different temperatures in order to gain activation parameters and relate the exchange rates to observed enhancement levels. The use of EXSY experiments, selectively irradiating the equatorial bound pyridine and then selectively irradiating the hydride *trans* to the oxygen at  $\delta$  -28.88, at temperatures from 278 K to 303 K gave increasing rate constants.

Table S25. Exchange rate data for pyridine dissociation and hydride dissociation at different temperatures in 3 in MeOH-d<sub>3</sub>

| T / K | Rate of pyridine dissociation / s <sup>-1</sup> | Rate of hydride $\delta$ - 29.2 dissociation / s <sup>-1</sup> | Rate of hydride interconversion $\delta$ -29.2 to -21.6 / s <sup>-1</sup> |
|-------|-------------------------------------------------|----------------------------------------------------------------|---------------------------------------------------------------------------|
| 278   | 0.17 ± 0.02                                     | 0.09 ± 0.02                                                    | 0.19 ± 0.02                                                               |
| 283   | 0.29 ± 0.11                                     | 0.11 ± 0.01                                                    | 0.52 ± 0.04                                                               |
| 288   | 0.53 ± 0.04                                     | 0.19 ± 0.03                                                    | 1.09 ± 0.11                                                               |
| 293   | 0.83 ± 0.02                                     | 0.36 ± 0.03                                                    | 1.84 ± 0.16                                                               |
| 298   | 1.33 ± 0.23                                     | 0.54 ± 0.03                                                    | 2.86 ± 0.18                                                               |
| 303   | 2.52 ± 0.30                                     | 0.96 ± 0.06                                                    | 3.59 ± 4.25                                                               |

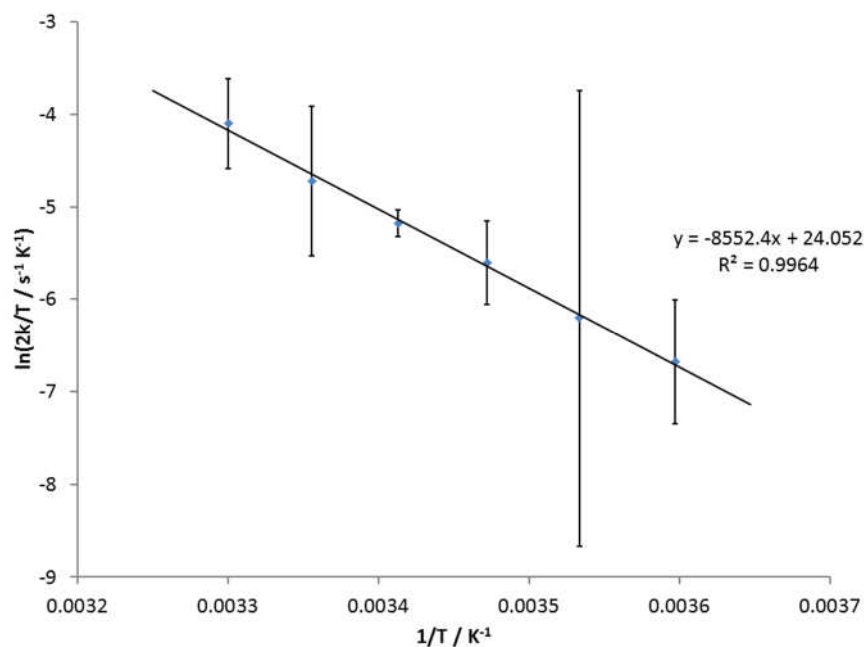

Figure S31. An Eyring-Polanyi plot for pyridine exchange at differing temperatures in 3 in MeOH-d<sub>3</sub>

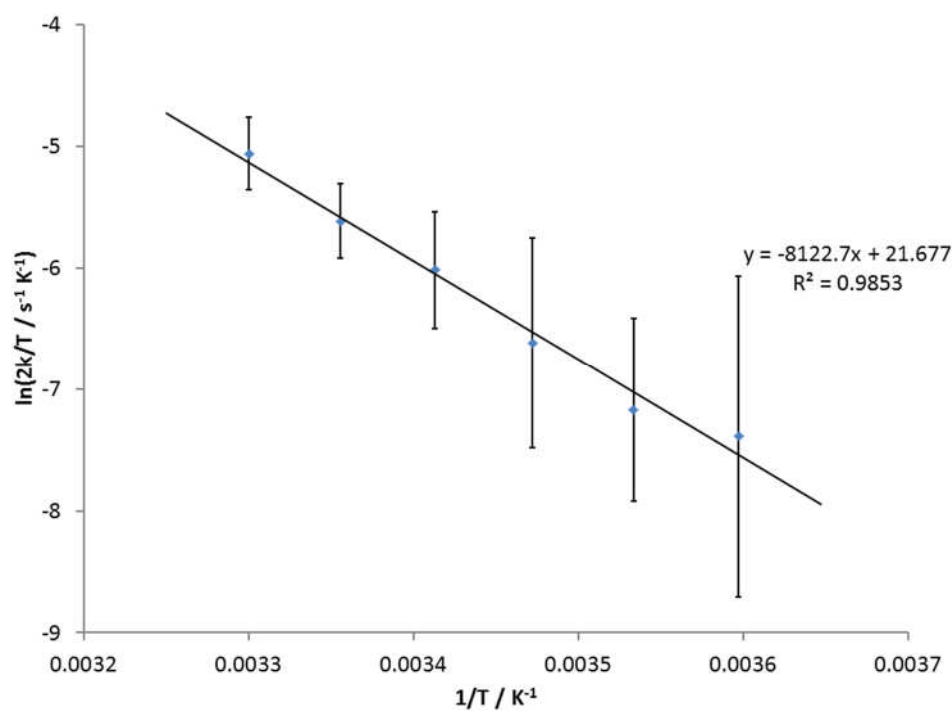

Figure S32. An Eyring-Polanyi plot for hydride-hydrogen exchange at differing temperatures in 3 in MeOH-d<sub>3</sub>

Table S26. Activation parameters calculated from the Arrhenius and Eyring-Polanyi plots for pyridine dissociation and hydride dissociation in 3 in MeOH-d<sub>3</sub>

|                                | Pyridine                                      |                        |                         |                                      | Hydride                                       |                        |                         |                                         |
|--------------------------------|-----------------------------------------------|------------------------|-------------------------|--------------------------------------|-----------------------------------------------|------------------------|-------------------------|-----------------------------------------|
|                                | E <sub>a</sub> / ΔH /<br>kJ mol <sup>-1</sup> | ΔS / J K <sup>-1</sup> | R <sup>2</sup><br>value | ΔG (300 K)<br>/ kJ mol <sup>-1</sup> | E <sub>a</sub> / ΔH /<br>kJ mol <sup>-1</sup> | ΔS / J K <sup>-1</sup> | R <sup>2</sup><br>value | ΔG (300<br>K) / kJ<br>mol <sup>-1</sup> |
| Arrhenius<br>equation          | 73.5 ± 3.3                                    |                        | 0.9966                  |                                      | 69.9 ± 7.3                                    |                        | 0.9862                  |                                         |
| Eyring-<br>Polanyi<br>equation | 71.1 ± 3.3                                    | 2.4 ± 11.5             | 0.9964                  | 70.4 ± 0.2                           | 67.5 ± 7.3                                    | -17.3 ± 24.7           | 0.9853                  | 72.7 ± 0.2                              |

## 6. Polarization transfer experiments

Polarization transfer experiments were conducted in either a Young's tube (Method A) or by using a polarizer as described elsewhere<sup>4</sup> (Method B).

**Method A.** Samples for polarization transfer experiments were conducted using a Young's NMR tube containing a solution of **1** or **4** (5 mol%), analyte ( $6.2 \times 10^{-5}$  mol) in 0.6 ml of MeOD- $d_4$ . The sample was degassed prior to the introduction of  $p$ -H<sub>2</sub> at a pressure of 3 bar. The sample was placed in a water bath of known temperature for 1 min before shaking in the desired magnetic field (using the fringe field of the magnet) for 10 s before being rapidly transported to the magnet for interrogation by NMR spectroscopy.

**Method B.** Samples polarized using the polarizer were achieved as follows. The polarization chamber was charged with either **1** or **4** (5 mol%) and the nitrogen heterocycle to be polarized (0.1 M) in MeOD- $d_4$  (3 ml). Parahydrogen was introduced to the solution via six inlet tubes at a pressure of 3 bar for 10 s. This solution was then transferred into the Bruker Avance III series 400 MHz spectrometer equipped with a TXO flow probe head (flow cell volume = 200  $\mu$ l) for interrogation by NMR using helium as a flow gas. A single transient was recorded for the nucleus of interest. Once interrogated, the solution could be returned to a polarizing chamber and this process repeated as required. A coil surrounded the reaction chamber such that a magnetic field could be generated in the z direction. This coil was designed to produce static DC fields in the range of  $-150$  to  $150 \times 10^{-4}$  T. For field profiling five <sup>1</sup>H NMR spectra were collected at each point to ensure reproducibility.

### Calculation of <sup>1</sup>H NMR enhancement factors

For calculation of the enhancement shown by the <sup>1</sup>H NMR signals the following formula was used:

$$E = \frac{S_{pol}}{S_{unpol}}$$

$E$  = enhancement

$S_{pol}$  = signal of the polarized sample

$S_{unpol}$  = signal of the unpolarized (reference) sample

Experimentally, the reference spectra were acquired with the same sample that was used for the hyperpolarized measurement after it had fully relaxed (typically 5-10 minutes at high magnetic field). Reference and polarized spectra were collected using identical acquisition parameters, particularly the receiver gain. The raw integrals of the relevant resonances in the polarized and unpolarized spectra were used to determine the enhancement level.



## Samples for polarization transfer experiments

Extensive investigations into the SABRE polarization of pyridine and nicotinamide, shown in Figure S33, by **1** have been conducted in MeOD- $d_4$  and appropriate spectra are detailed in Figures S34 – S44 for pyridine and Figures S45 – S57 for nicotinamide. These include typical results for proton and carbon polarization as a function of both ligand concentration and temperature as well as OPSY spectra. Analysis of the effect of solvent on pyridine polarization is also detailed in Figure S58 and Table S27.

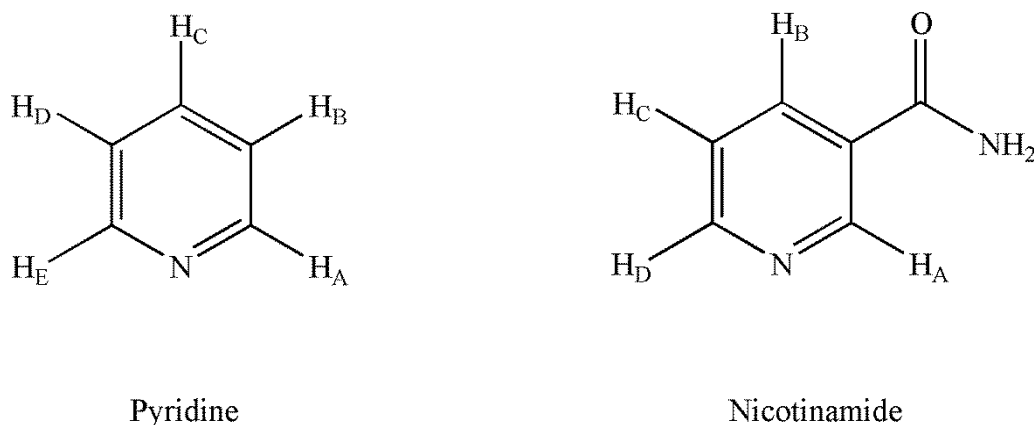

Figure S33. Analytes tested and their proton assignments

## Polarization transfer to pyridine using **1** as a catalyst using method A

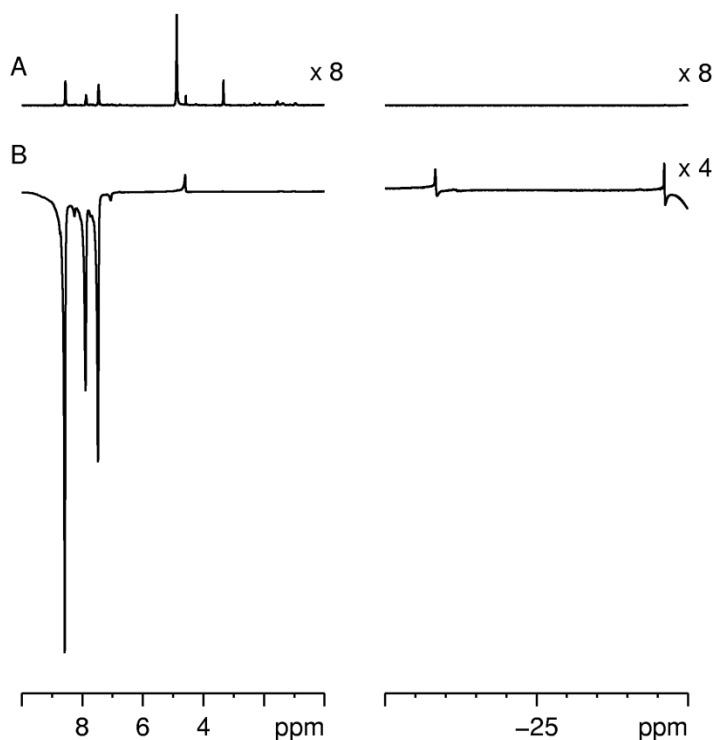

Figure S34. <sup>1</sup>H NMR spectra of a sample containing 0.1 M pyridine and 5 mol% **1** in MeOD- $d_4$  after; (A) thermal equilibrium at high field; and (B) polarization transfer from p-H<sub>2</sub> at  $6.5 \times 10^{-3}$  T and 60 °C

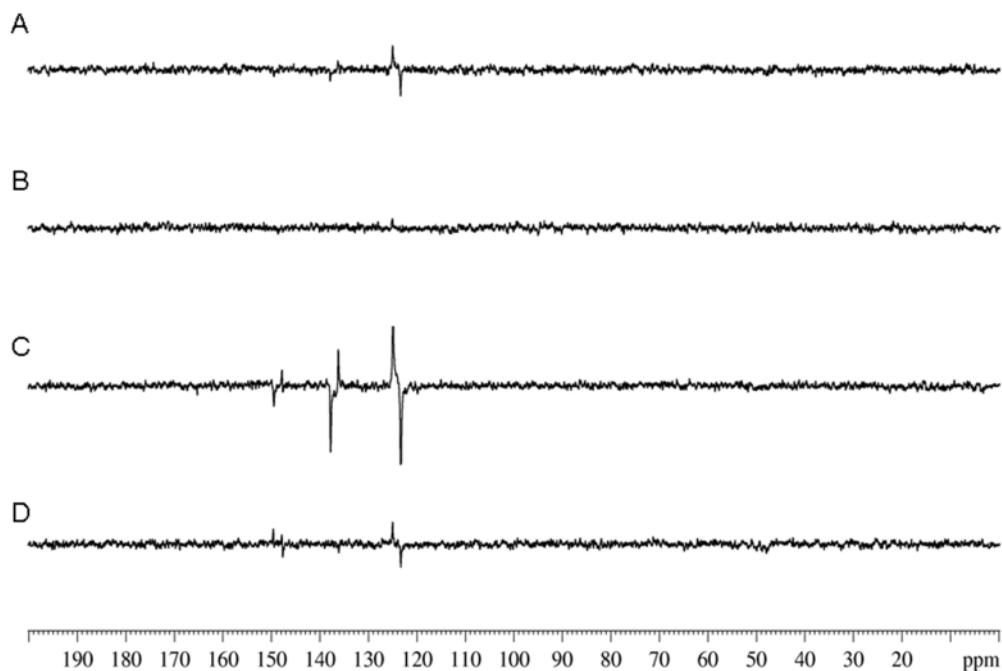

**Figure S35.**  $^{13}\text{C}$  NMR spectra of a sample containing 0.1 M pyridine and 5 mol% **1** in  $\text{MeOD-}d_4$  after polarization transfer at; (A)  $0^\circ\text{C}$  and  $6.5 \times 10^{-3} \text{ T}$ ; (B)  $0^\circ\text{C}$  and  $2 \times 10^{-4} \text{ T}$ ; (C)  $60^\circ\text{C}$  and  $6.5 \times 10^{-3} \text{ T}$ ; and (D)  $60^\circ\text{C}$  and  $2 \times 10^{-4} \text{ T}$

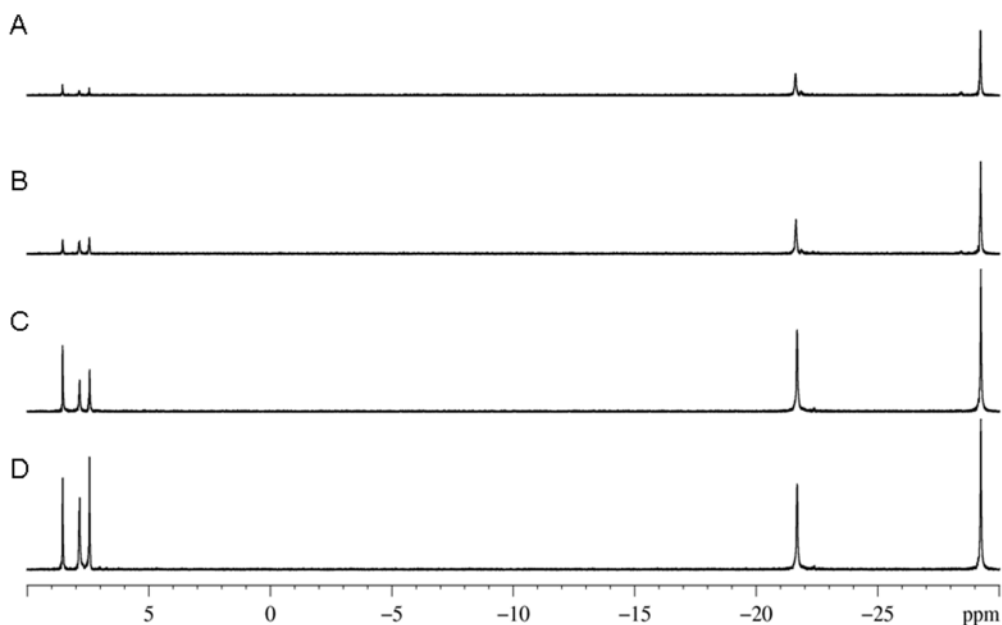

**Figure S36.**  $^1\text{H}$  OPSY-dq NMR spectra of a sample containing 0.1 M pyridine and 5 mol% **1** in  $\text{MeOD-}d_4$  after polarization transfer at; (A)  $0^\circ\text{C}$  and  $6.5 \times 10^{-3} \text{ T}$ ; (B)  $0^\circ\text{C}$  and  $2 \times 10^{-4} \text{ T}$ ; (C)  $61^\circ\text{C}$  and  $6.5 \times 10^{-3} \text{ T}$ ; and (D)  $61^\circ\text{C}$  and  $2 \times 10^{-4} \text{ T}$

**Polarization transfer to pyridine using 1 as a catalyst using method B**

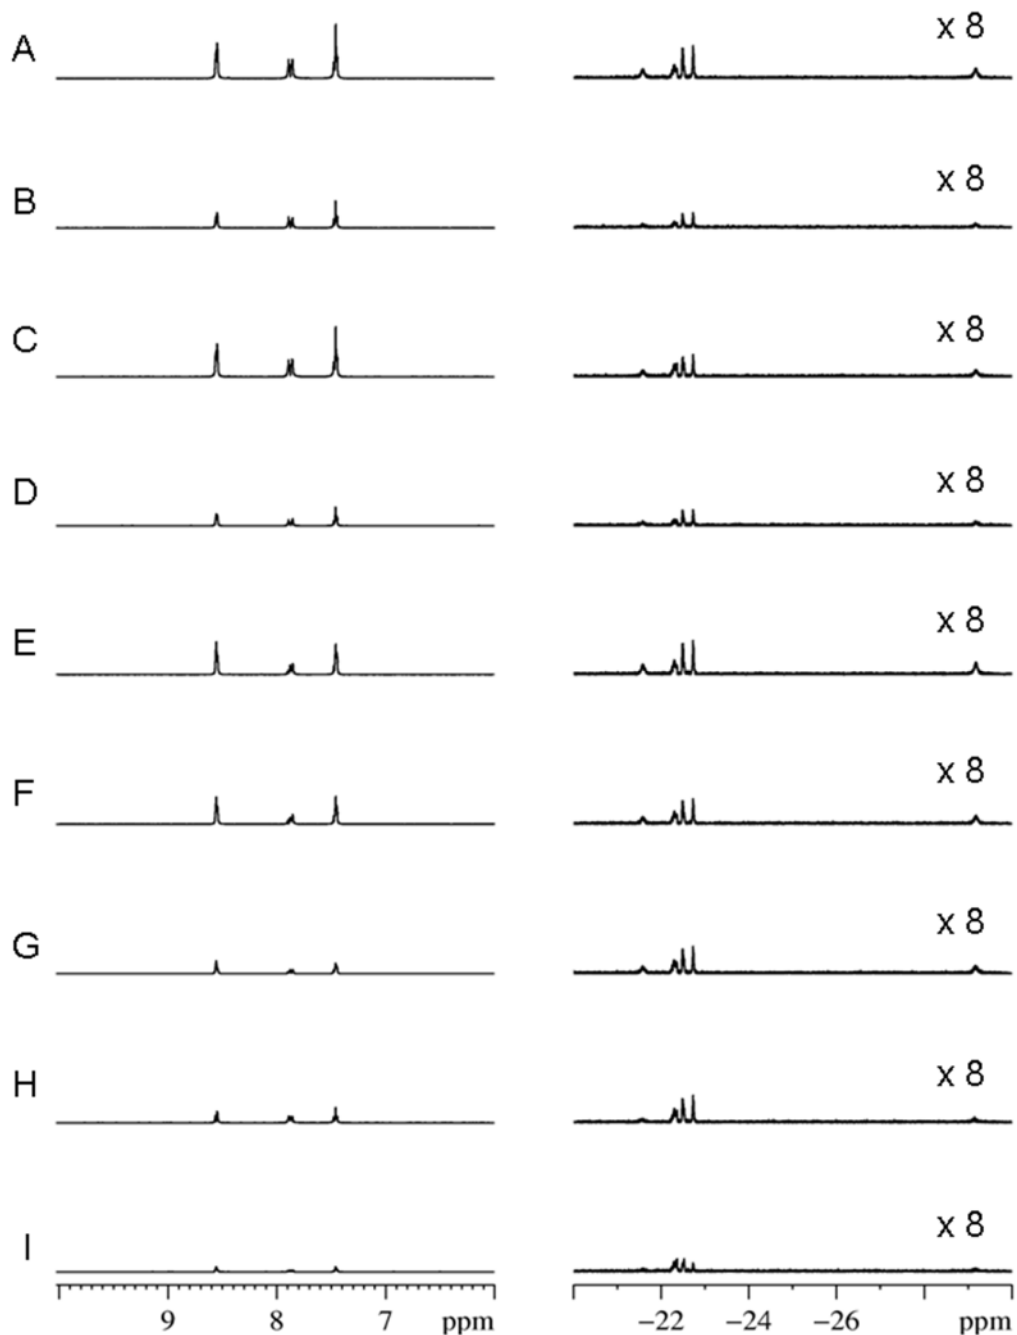

*Figure S37. <sup>1</sup>H OPSY-dq NMR spectra of a sample containing 0.1 M pyridine and 5 mol% 1 in MeOD-d<sub>4</sub> after polarization transfer at RT and; (A)  $2.5 \times 10^{-3}$  T; (B)  $0 \times 10^{-4}$  T; (C)  $-2.5 \times 10^{-3}$  T; (D)  $-5 \times 10^{-3}$  T; (E)  $-6.5 \times 10^{-3}$  T; (F)  $7.5 \times 10^{-3}$  T; (G)  $-1 \times 10^{-2}$  T; (H)  $-1.25 \times 10^{-2}$  T; (I)  $-1.5 \times 10^{-2}$  T*

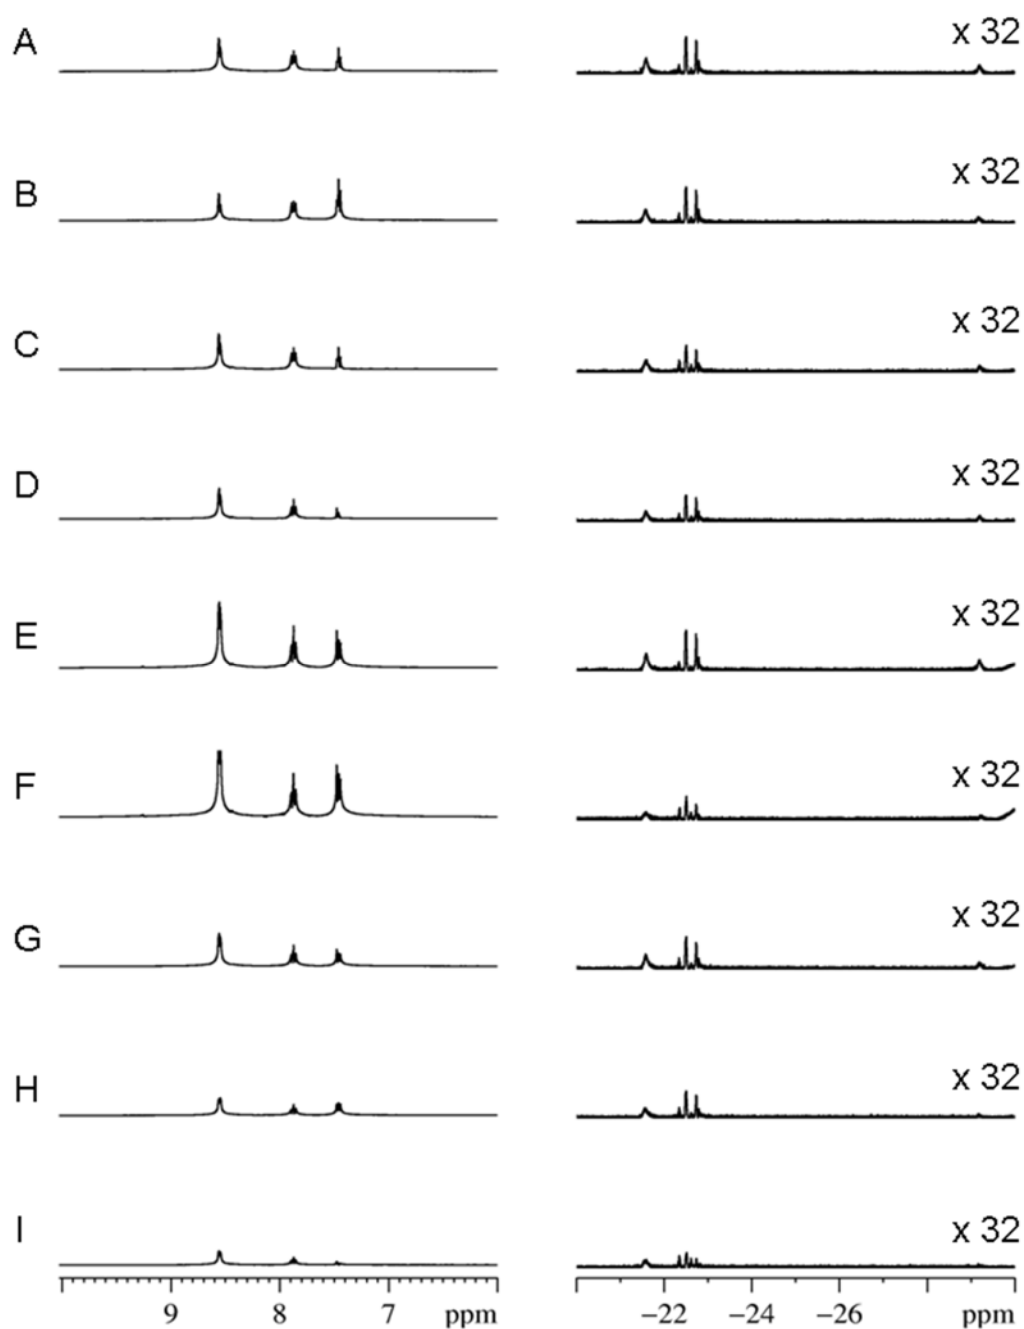

**Figure S38.**  $^1\text{H}$  OPSY- $zq$  NMR spectra of a sample containing 0.1 M pyridine and 5 mol% **1** in  $\text{MeOD-}d_4$  after polarization transfer at RT and; (A)  $2.5 \times 10^{-3}$  T; (B)  $0 \times 10^{-4}$  T; (C)  $-2.5 \times 10^{-3}$  T; (D)  $-5 \times 10^{-3}$  T; (E)  $-6.5 \times 10^{-3}$  T; (F)  $7.5 \times 10^{-3}$  T; (G)  $-1 \times 10^{-2}$  T; (H)  $-1.25 \times 10^{-2}$  T; (I)  $-1.5 \times 10^{-2}$  T

### Influence of temperature on polarization transfer to pyridine using 1 as a catalyst using method A

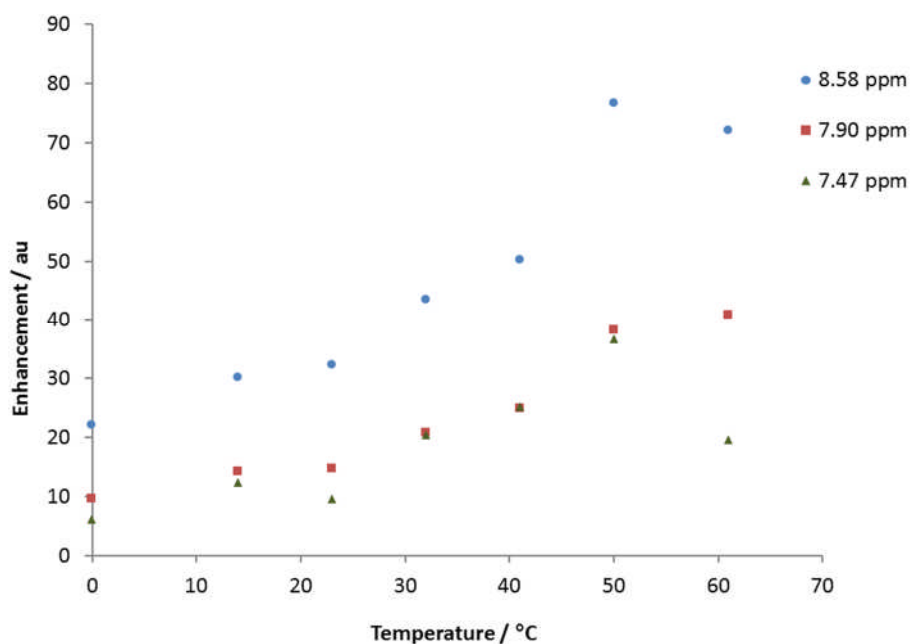

Figure S39. Enhancement observed for each type of <sup>1</sup>H resonance ( $H_A$  and  $H_E$  ●,  $H_C$  ■ and  $H_B$  and  $H_D$  ▲) of pyridine after polarization transfer from  $p\text{-H}_2$  using 1 at  $2 \times 10^{-4}$  T

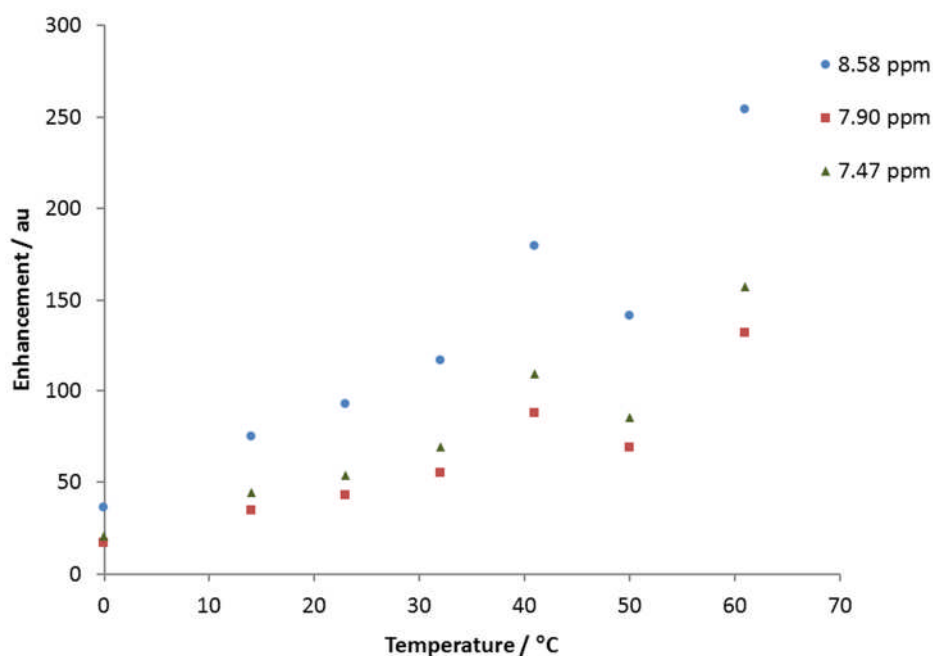

Figure S40. Enhancement observed for each type of <sup>1</sup>H resonance ( $H_A$  and  $H_E$  ●,  $H_C$  ■ and  $H_B$  and  $H_D$  ▲) of pyridine after polarization transfer from  $p\text{-H}_2$  using 1 at  $6.5 \times 10^{-3}$  T

### Influence of temperature on polarization transfer to pyridine using 4 as a catalyst using method A

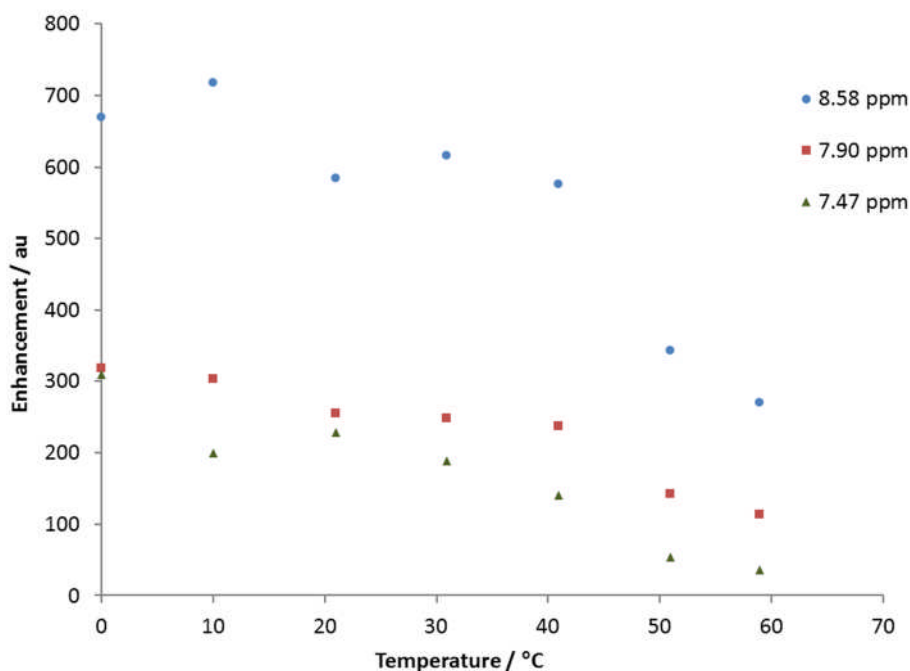

Figure S41. Enhancement observed for each type of <sup>1</sup>H resonance ( $H_A$  and  $H_E$  ●,  $H_C$  ■ and  $H_B$  and  $H_D$  ▲) of pyridine after polarization transfer from  $p\text{-H}_2$  using 4 at  $2 \times 10^{-4}$  T

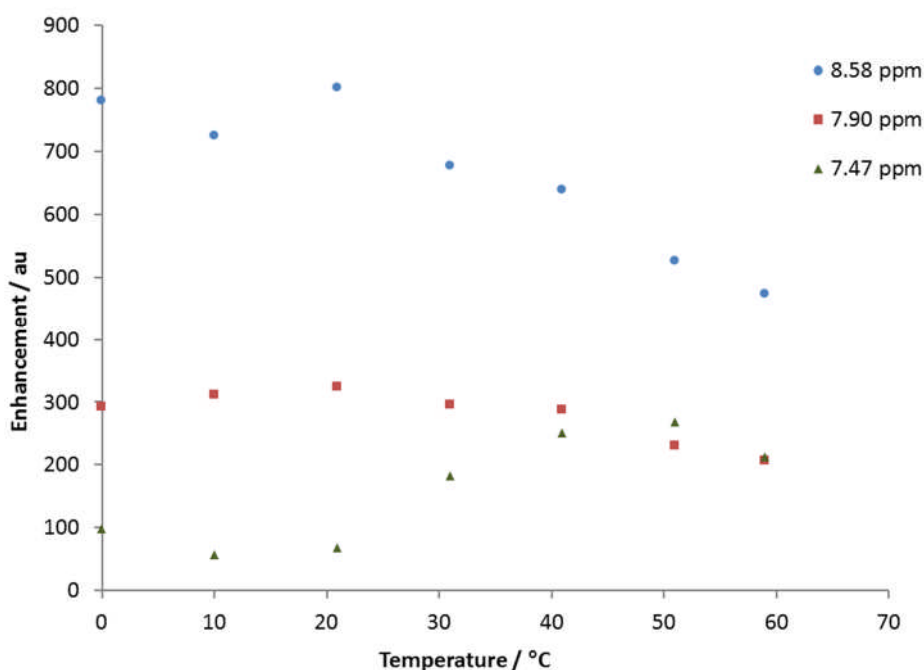

Figure S42. Enhancement observed for each type of <sup>1</sup>H resonance ( $H_A$  and  $H_E$  ●,  $H_C$  ■ and  $H_B$  and  $H_D$  ▲) of pyridine after polarization transfer from  $p\text{-H}_2$  using 4 at  $6.5 \times 10^{-3}$  T

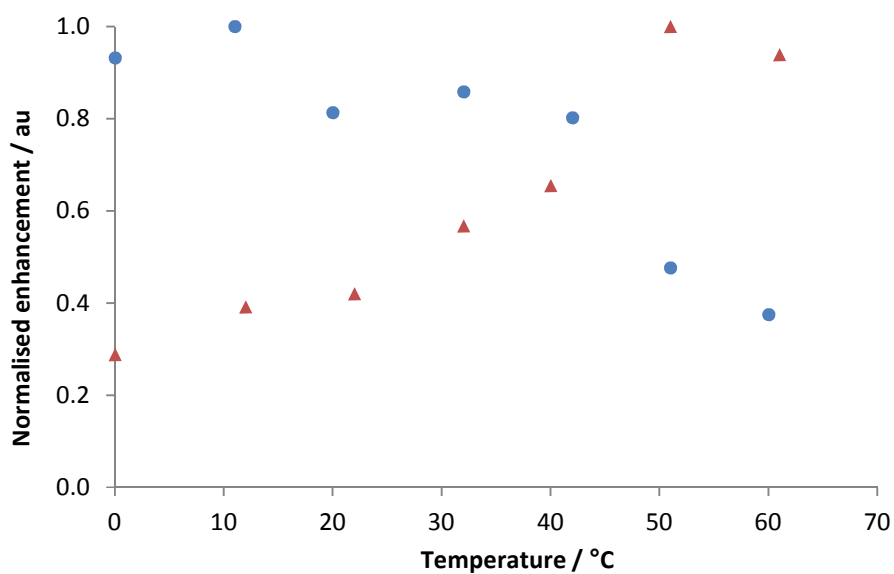

**Figure S43.** Normalised enhancement of the  $H_{A/E}$   $^1H$  NMR resonance of pyridine after polarization transfer using  $p\text{-H}_2$  at  $2 \times 10^{-4}$  T; one containing pyridine (0.1M) and 4 (2 mg) in deuterated methanol (0.6 ml) and one containing pyridine (0.1M) and 1 (2 mg) in deuterated methanol (0.6 ml)

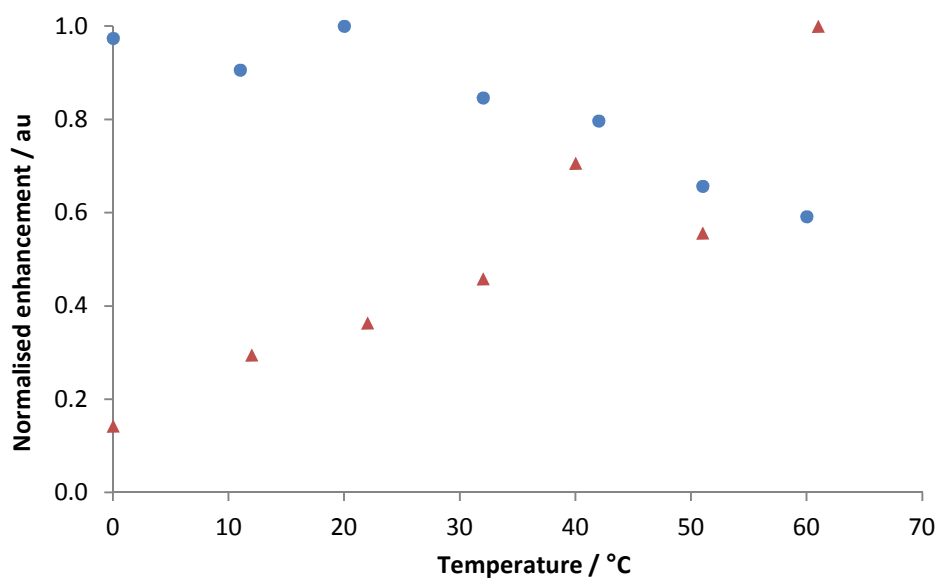

**Figure S44.** Normalised enhancement of the  $H_{A/E}$   $^1H$  NMR resonance of pyridine after polarization transfer using  $p\text{-H}_2$  at  $6.5 \times 10^{-3}$  T; one containing pyridine (0.1M) and 4 (2 mg) in deuterated methanol (0.6 ml) and one containing pyridine (0.1M) and 1 (2 mg) in deuterated methanol (0.6 ml)

**Polarization transfer to nicotinamide using 1 as a catalyst using method A**

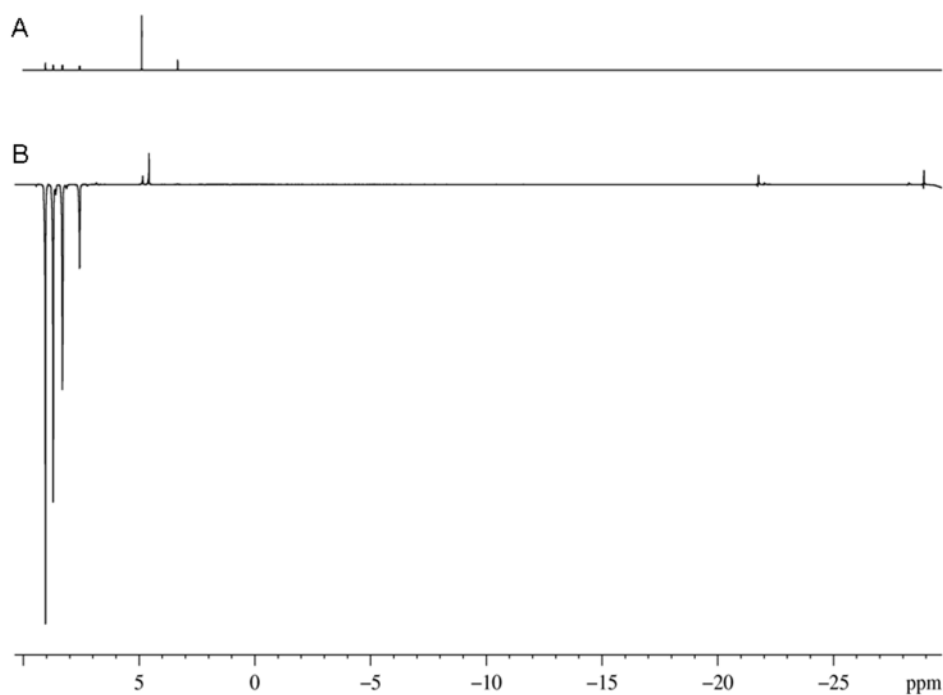

*Figure S45.  $^1\text{H}$  NMR spectra of a sample containing 0.1 M nicotinamide and 5 mol% 1 in MeOD- $d_4$  after; (A) thermal equilibrium at high field; and (B) polarization transfer from  $p\text{-H}_2$  at  $6.5 \times 10^{-3}$  T and  $60^\circ\text{C}$*

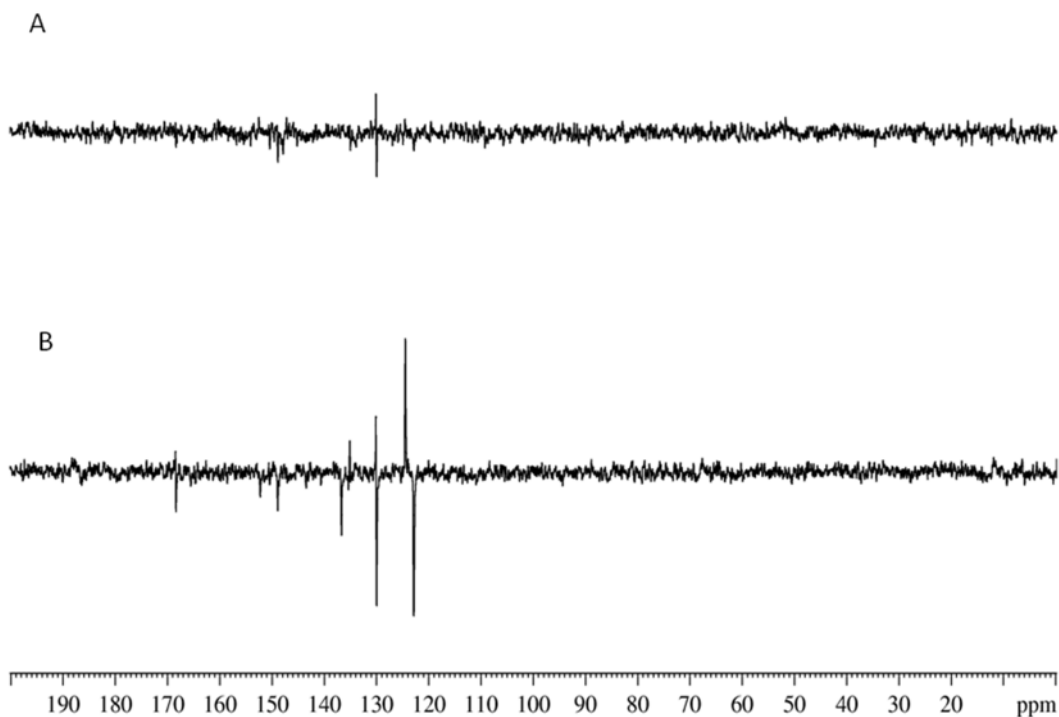

*Figure S46.  $^{13}\text{C}$  NMR spectra of a sample containing 0.1 M pyridine and 5 mol% 1 in MeOD- $d_4$  after polarization transfer from  $p\text{-H}_2$  at  $60^\circ\text{C}$  and  $2 \times 10^{-4}$  T (A) and  $6.5 \times 10^{-3}$  T (B)*



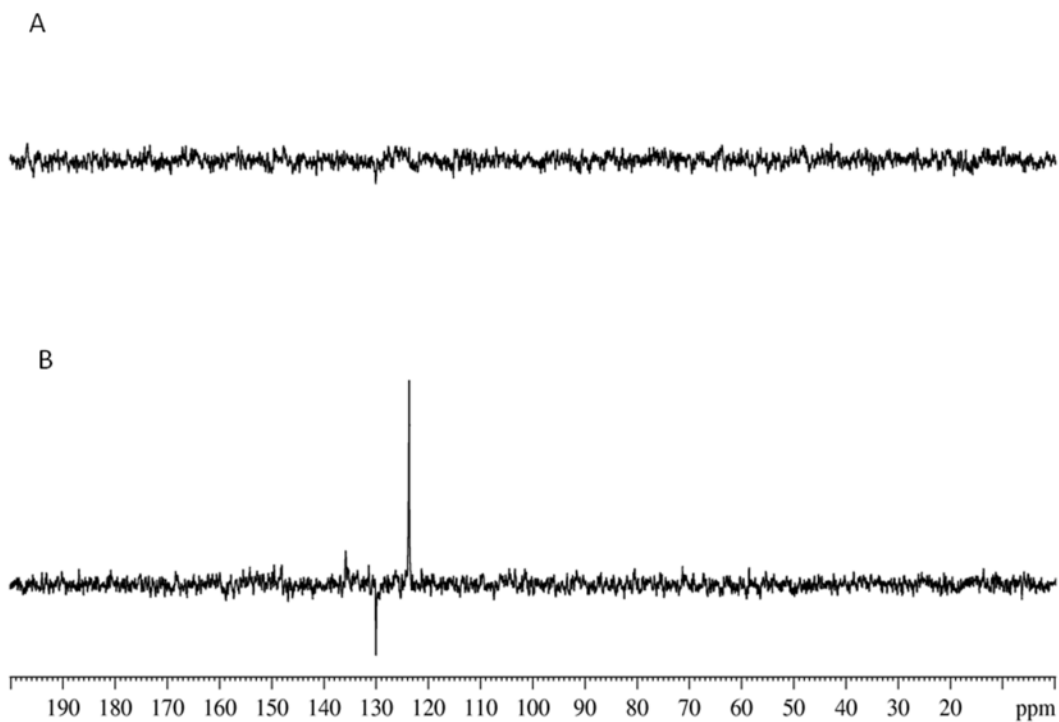

**Figure S47.**  $^{13}\text{C}\{^1\text{H}\}$  NMR spectra of a sample containing 0.1 M nicotinamide and 5 mol% **1** in MeOD- $d_4$  after polarization transfer from  $p\text{-H}_2$  at 60°C and  $2 \times 10^{-4}$  T (A) and  $6.5 \times 10^{-3}$  T (B)

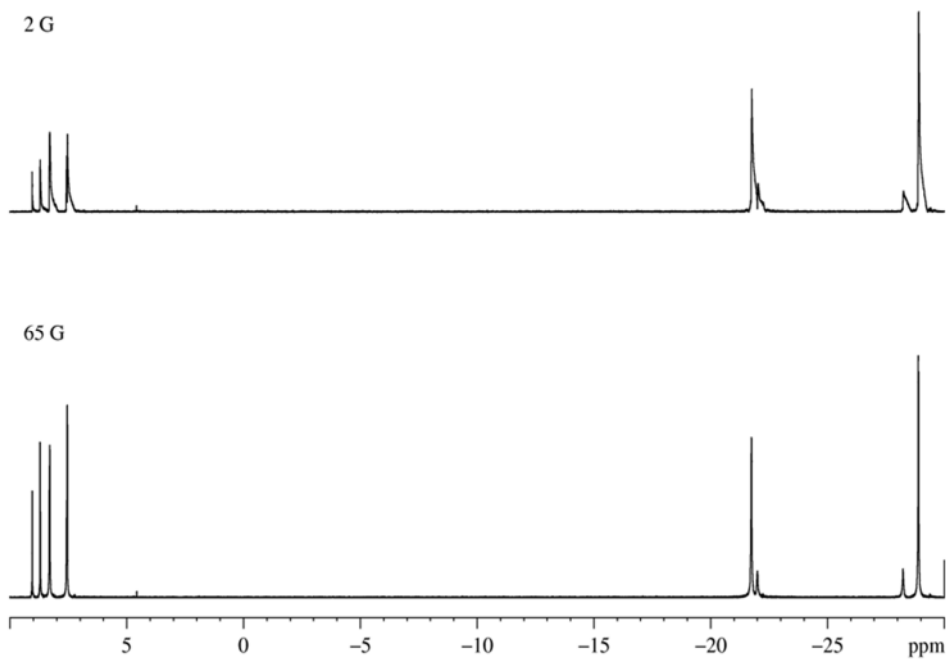

**Figure S48.** OPSY- $dq$   $^1\text{H}$  NMR spectra of a sample containing 0.1 M nicotinamide and 5 mol% **1** in MeOD- $d_4$  after polarization transfer from  $p\text{-H}_2$  at 60°C and  $2 \times 10^{-4}$  T (A) and  $6.5 \times 10^{-3}$  T (B)

**Polarization transfer to nicotinamide using 1 as a catalyst using method B**

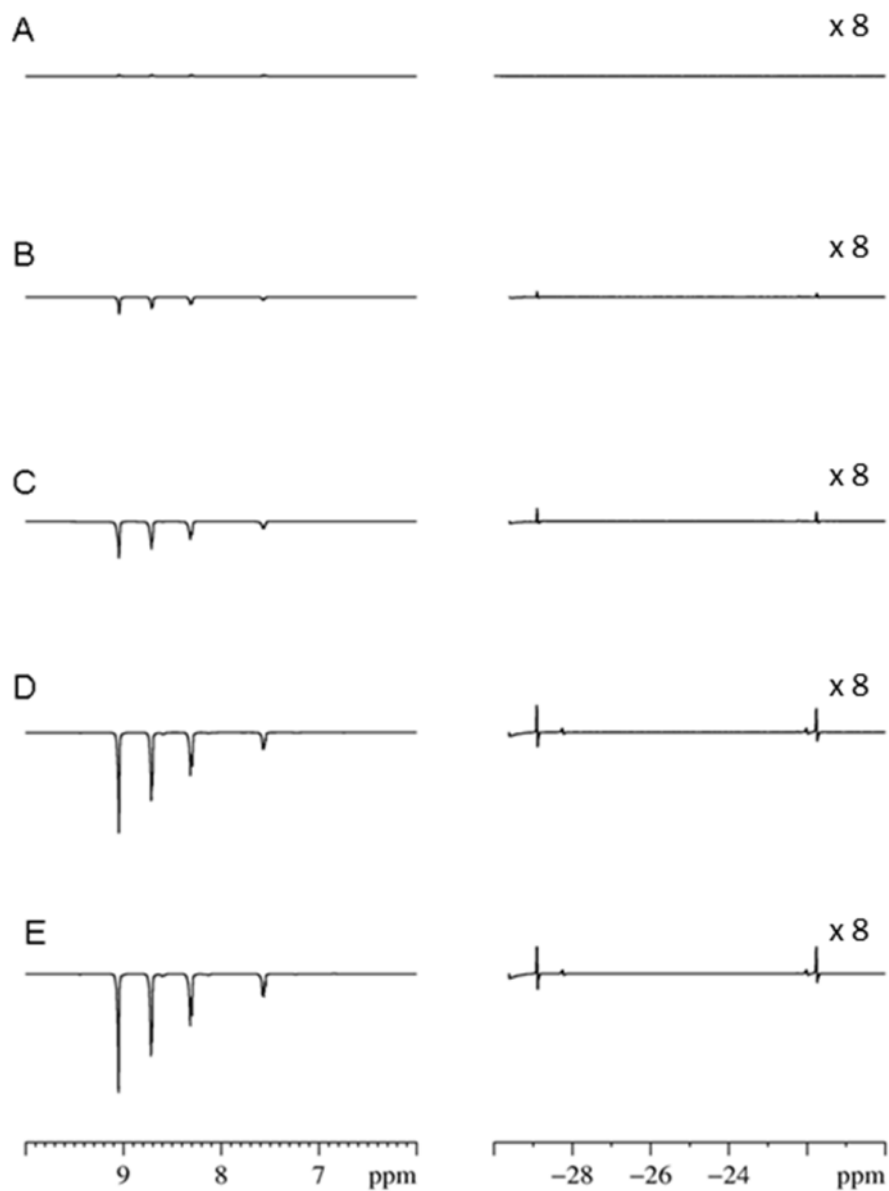

*Figure S49.  $^1\text{H}$  NMR spectra of a sample containing 0.1 M nicotinamide and 5 mol% 1 in  $\text{MeOD-d}_4$  after polarization transfer from  $p\text{-H}_2$  at  $60^\circ\text{C}$  and  $6.5 \times 10^{-3}$  T. Between each run (A-E), the sample was cooled to RT before the process was repeated again*

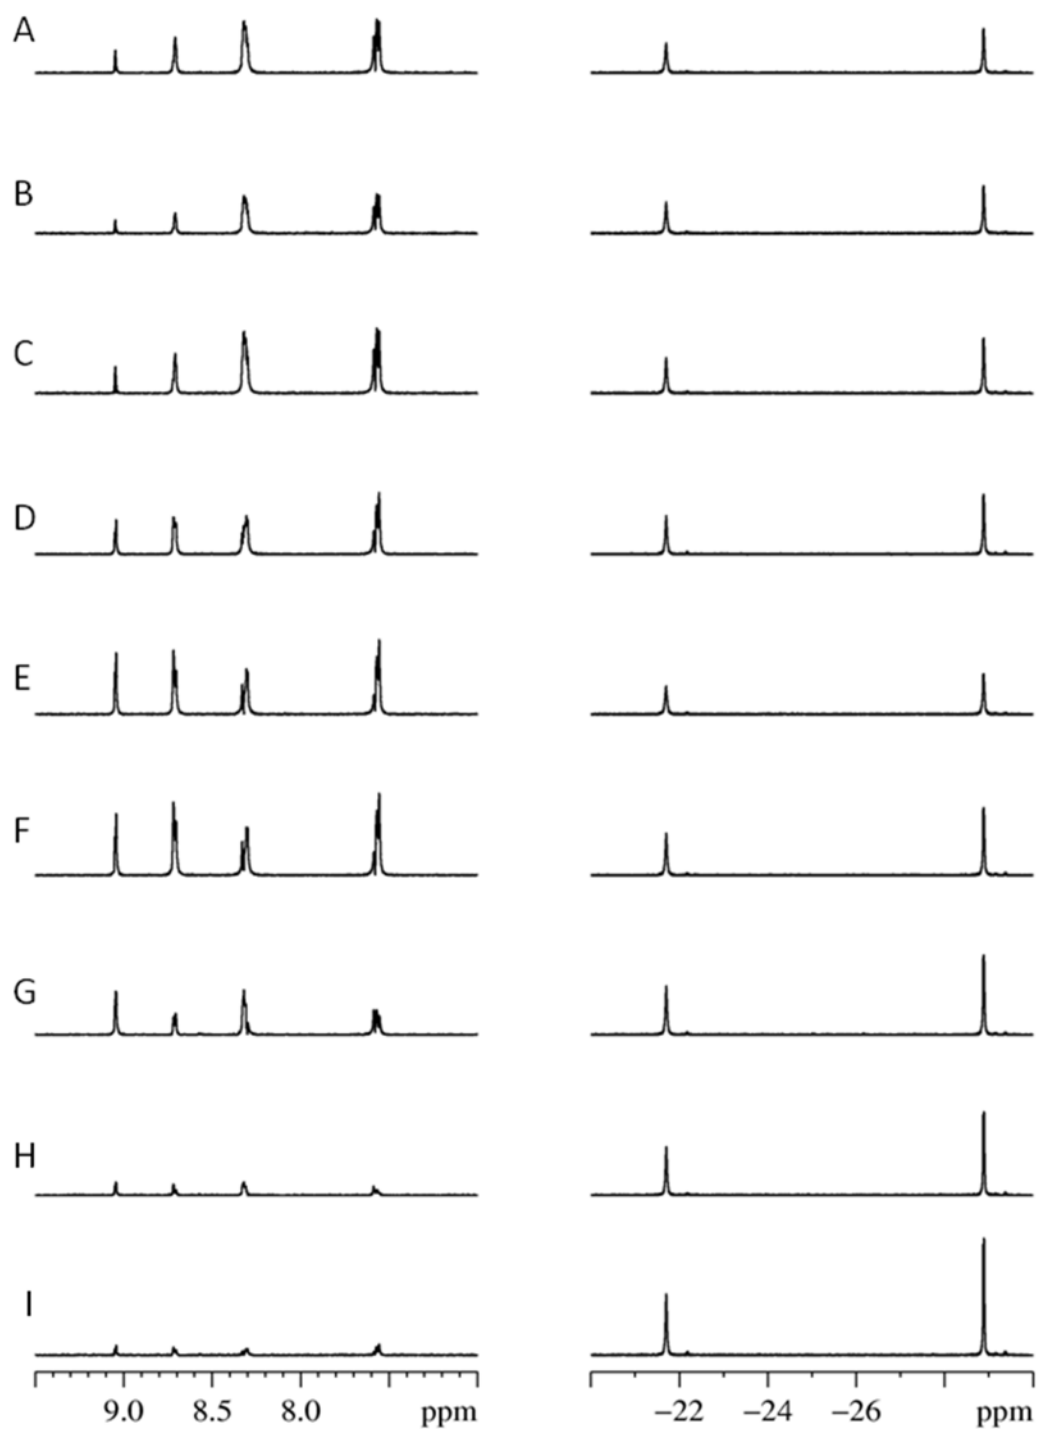

**Figure S50.** OPSY-dq  $^1\text{H}$  NMR spectra of a sample containing 0.1 M nicotinamide and 5 mol% 1 in  $\text{MeOD-d}_4$  after polarization transfer from  $p\text{-H}_2$  at RT and  $2.5 \times 10^{-3}$  T (A);  $0 \times 10^{-4}$  T (B),  $-2.5 \times 10^{-3}$  T (C),  $-5 \times 10^{-3}$  T (D);  $-6.5 \times 10^{-3}$  T (E);  $-7.5 \times 10^{-3}$  T (F);  $-1 \times 10^{-2}$  T (G);  $-1.25 \times 10^{-2}$  T (H);  $-1.5 \times 10^{-2}$  T (I)

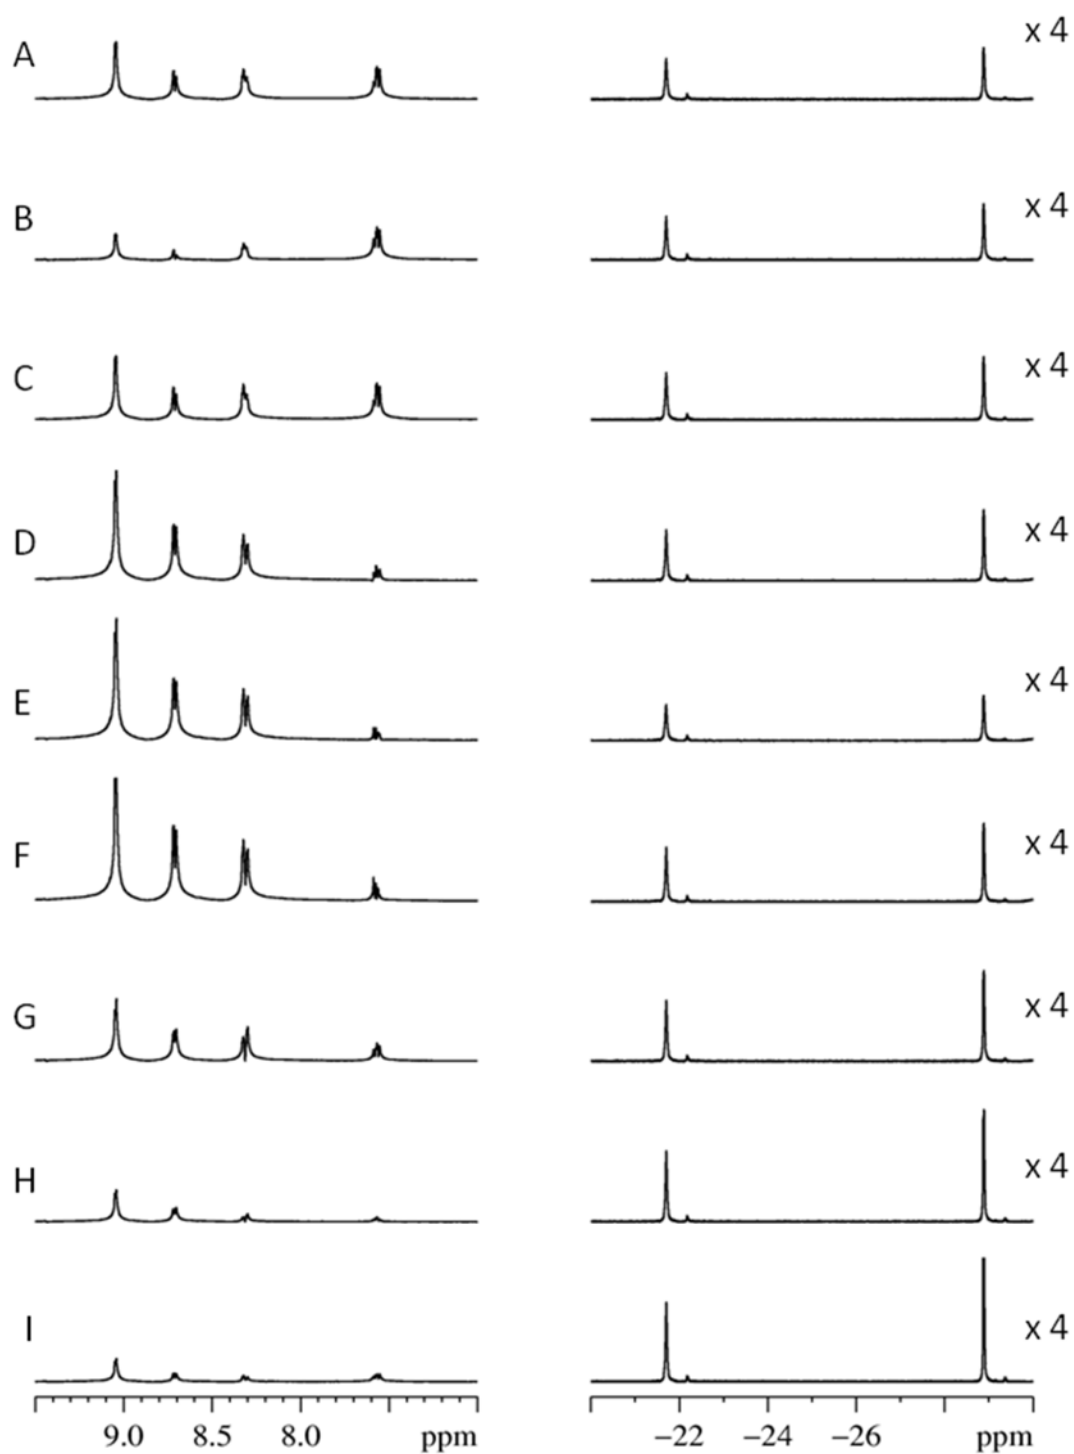

**Figure S51.** OPSY-zq  $^1\text{H}$  NMR spectra of a sample containing 0.1 M nicotinamide and 5 mol% **1** in  $\text{MeOD-d}_4$  after polarization transfer from  $p\text{-H}_2$  at RT and  $2.5 \times 10^{-3}$  T (A);  $0 \times 10^{-4}$  T (B),  $-2.5 \times 10^{-3}$  T (C),  $-5 \times 10^{-3}$  T (D);  $-6.5 \times 10^{-3}$  T (E);  $-7.5 \times 10^{-3}$  T (F);  $-1 \times 10^{-2}$  T (G);  $-1.25 \times 10^{-2}$  T (H);  $-1.5 \times 10^{-2}$  T (I)

**Influence of temperature on polarization transfer to nicotinamide using 1 as a catalyst using method A**

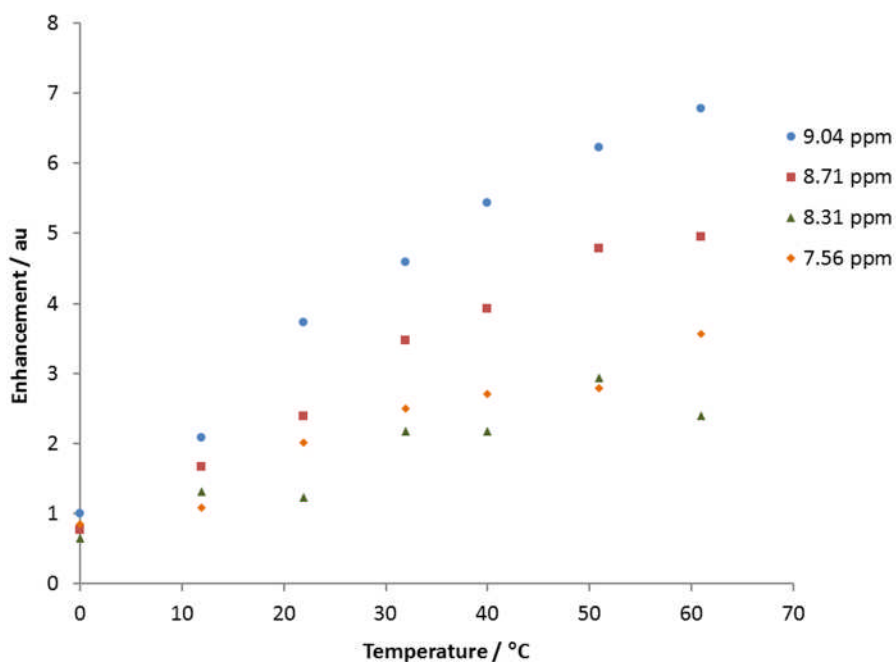

*Figure S52. Enhancement observed for each type of <sup>1</sup>H resonance ( $H_A$  ●,  $H_B$  ▲,  $H_C$  ◆,  $H_D$  ■) of nicotinamide after polarization transfer from  $p$ - $H_2$  using 1 at  $2 \times 10^{-4}$  T*

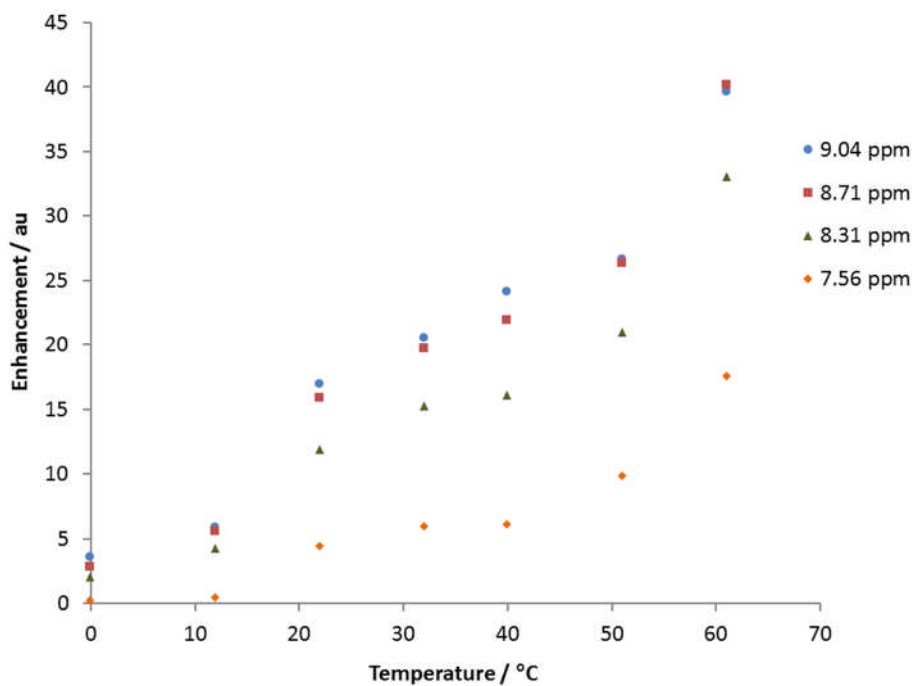

*Figure S53. Enhancement observed for each type of <sup>1</sup>H resonance ( $H_A$  ●,  $H_B$  ▲,  $H_C$  ◆,  $H_D$  ■) of nicotinamide after polarization transfer from  $p$ - $H_2$  using 1 at  $6.5 \times 10^{-3}$  T*

### Influence of temperature on polarization transfer to nicotinamide using 4 as a catalyst using method A

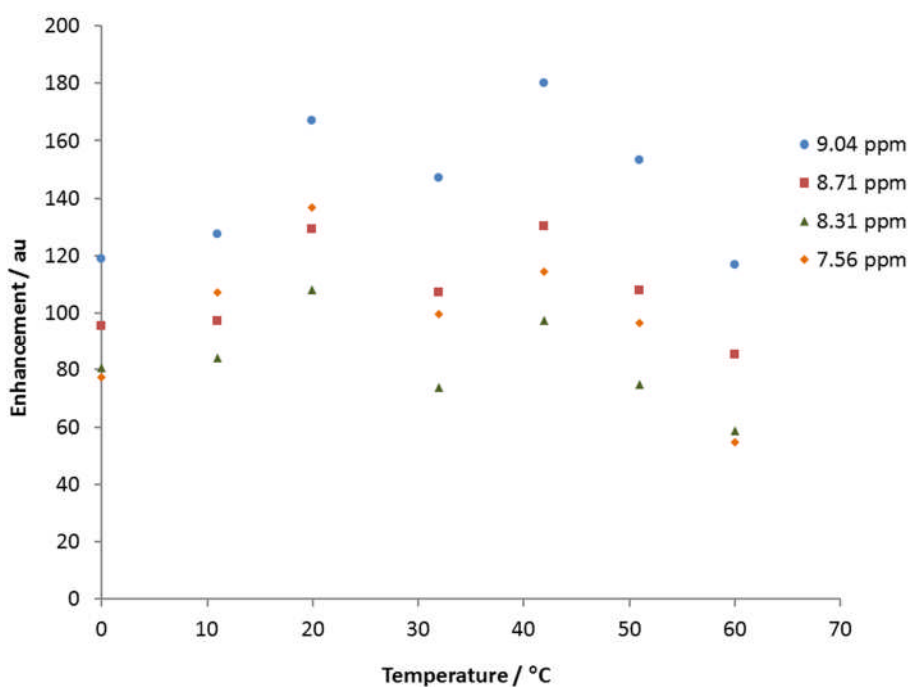

Figure S54. Enhancement observed for each type of <sup>1</sup>H resonance ( $H_A$  ●,  $H_B$  ▲,  $H_C$  ◆,  $H_D$  ■) of nicotinamide after polarization transfer from  $p\text{-H}_2$  using 4 at  $2 \times 10^{-4}$  T

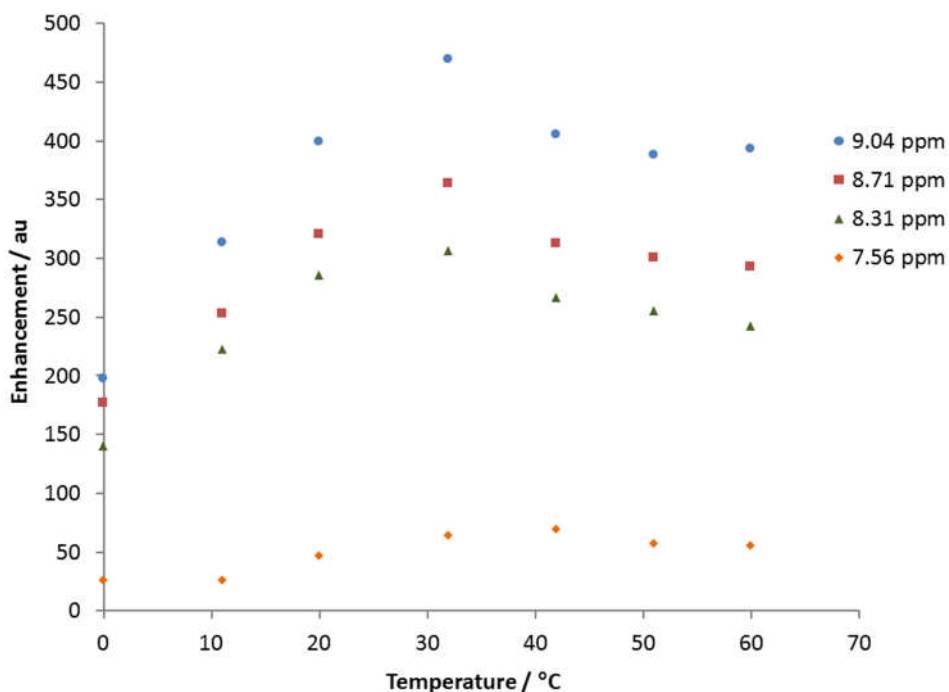

Figure S55. Enhancement observed for each type of <sup>1</sup>H resonance ( $H_A$  ●,  $H_B$  ▲,  $H_C$  ◆,  $H_D$  ■) of nicotinamide after polarization transfer from  $p\text{-H}_2$  using 4 at  $6.5 \times 10^{-3}$  T

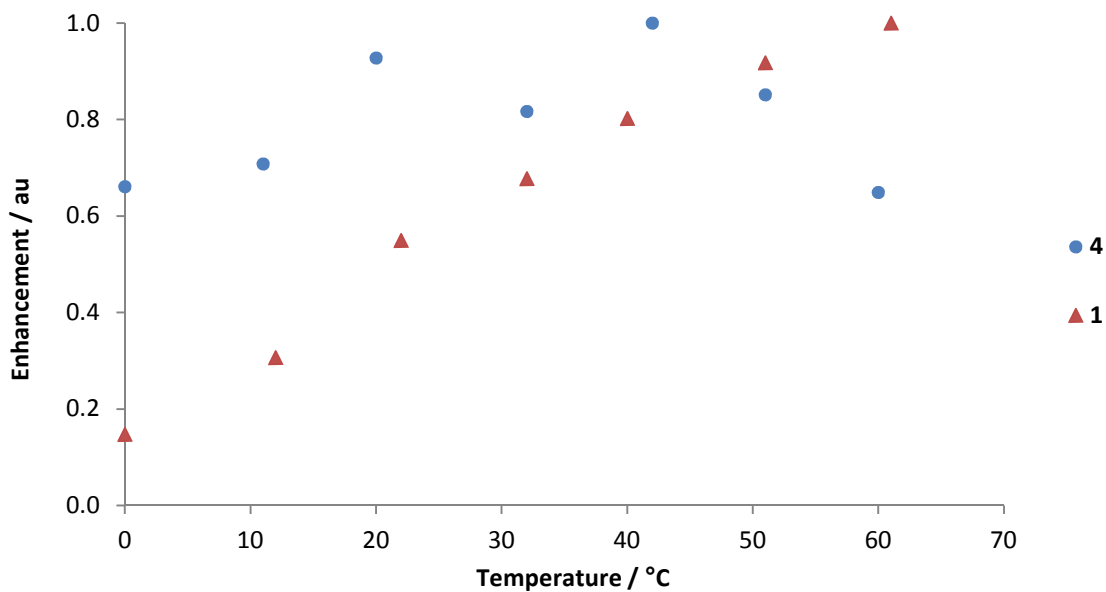

**Figure S56.** Normalised enhancement of the  $H_A$   $^1H$  NMR resonance of nicotinamide after polarization transfer using  $p-H_2$  at  $2 \times 10^{-4}$  T; one containing nicotinamide (0.1M) and 4 (2 mg) in deuterated methanol (0.6 ml) and one containing nicotinamide (0.1M) and 1 (2 mg) in deuterated methanol (0.6 ml)

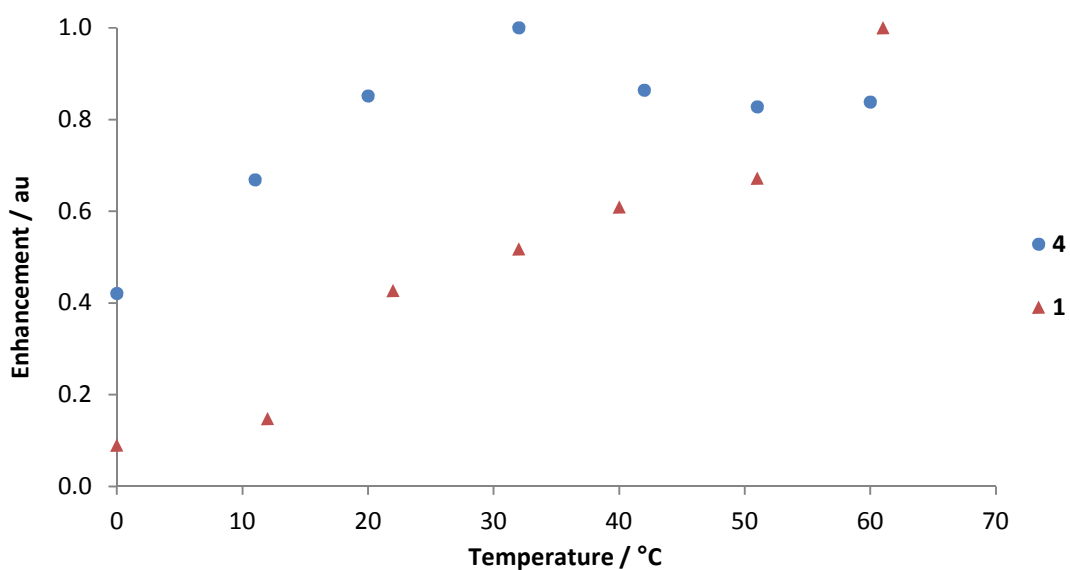

**Figure S57.** Normalized enhancement of the  $H_A$   $^1H$  NMR resonance of nicotinamide after polarization transfer using  $p-H_2$  at  $6.5 \times 10^{-3}$  T; one containing nicotinamide (0.1M) and 4 (2 mg) in deuterated methanol (0.6 ml) and one containing nicotinamide (0.1M) and 1 (2 mg) in deuterated methanol (0.6 ml)

### Examination of the effect of solvent on the reaction of **3** with *p*-H<sub>2</sub>

The same active catalyst **3** formed in all solvents that were studied. SABRE was demonstrated in each solvent and the two inequivalent hydrides were present as shown in Figure S58. The proton NMR enhancement values for the protons of pyridine are shown in Table S27.

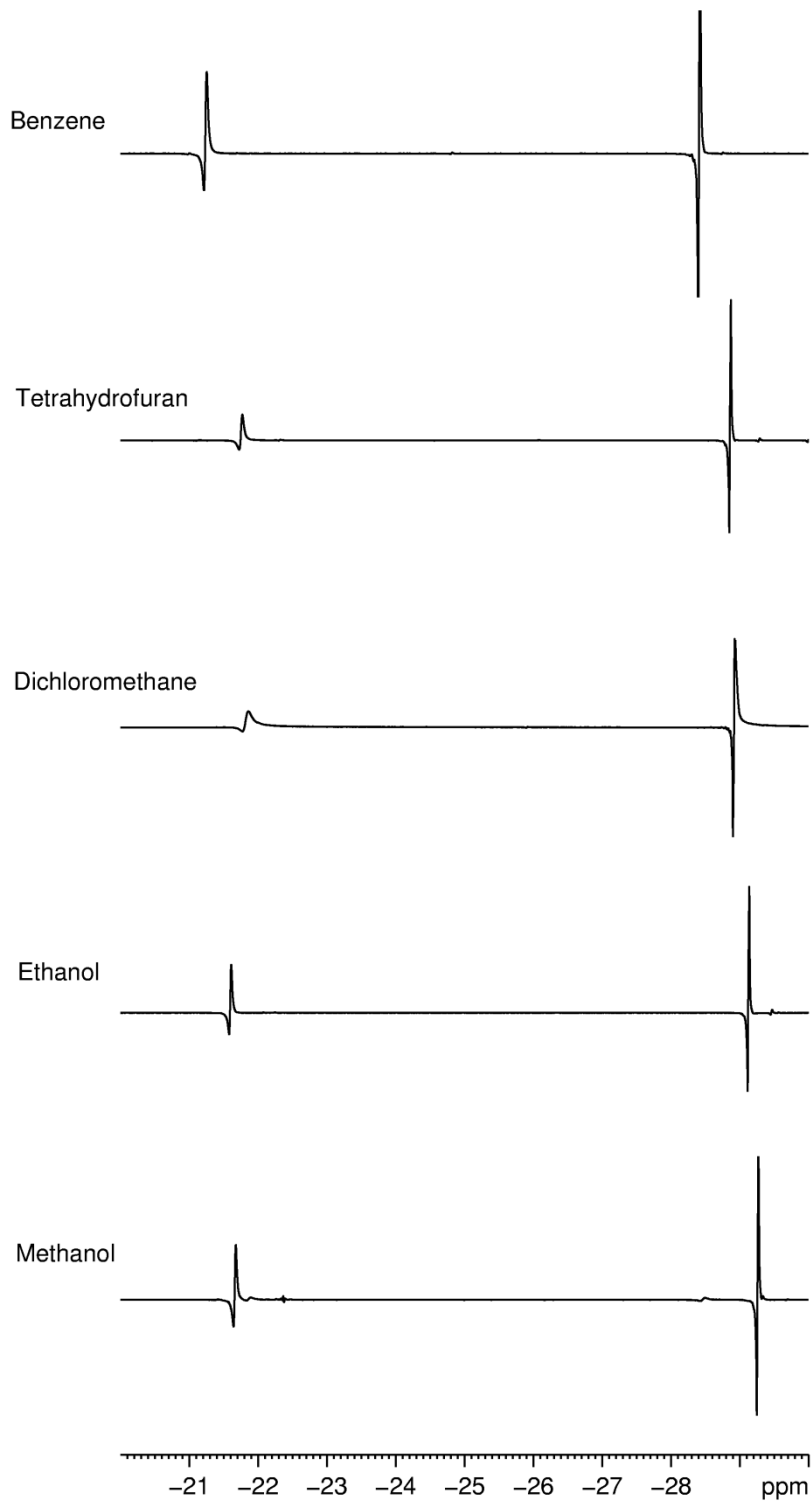

*Figure S58. The hydride region of each spectra when polarizing pyridine in different solvents*



**Table S27. Pyridine <sup>1</sup>H NMR signal enhancements produced for a series of 0.05 M pyridine and 15 mol% 1 solutions at 298 K with 3 bar of p-H<sub>2</sub> after an activation period of 48 hours and 24 days**

| Deuterated solvent              | Pyridine <sup>1</sup> H NMR SABRE enhancement (fold) |             |             |              |              |              |
|---------------------------------|------------------------------------------------------|-------------|-------------|--------------|--------------|--------------|
|                                 | 48 hours                                             |             |             | 24 days      |              |              |
|                                 | <i>ortho</i>                                         | <i>meta</i> | <i>para</i> | <i>ortho</i> | <i>meta</i>  | <i>para</i>  |
| Benzene                         | 115.8 ± 6.1                                          | 89.9 ± 5.2  | 54.1 ± 3.0  | 501.5 ± 76.7 | 401.5 ± 87.1 | 222.0 ± 41.8 |
| THF                             | 93.6 ± 5.7                                           | 57.5 ± 4.9  | 46.9 ± 3.2  | 579.2 ± 24.1 | 402.1 ± 49.5 | 262.1 ± 11.8 |
| CD <sub>2</sub> Cl <sub>2</sub> | 132.5 ± 13.3                                         | 94.4 ± 15.9 | 60.6 ± 7.1  | 306.7 ± 58.1 | 222.1 ± 58.9 | 138.5 ± 26.7 |
| Ethanol                         | 72.5 ± 13.9                                          | 26.7 ± 8.2  | 30.5 ± 6.1  | 281.4 ± 28.7 | 135.0 ± 23.5 | 141.3 ± 7.5  |
| Methanol                        | 176.4 ± 9.1                                          | 122.6 ± 8.4 | 78.2 ± 4.0  | 27.4 ± 3.5   | 21.0 ± 3.5   | 16.7 ± 2.3   |

After long activation times, the complex also seemed to be stable in both CD<sub>2</sub>Cl<sub>2</sub> and benzene. However, after 24 days the signal enhancements in methanol had severely dropped off. This relates to the <sup>2</sup>H-labelling of the pyridine due to H-D exchange with the solvent and incorporation into the *ortho* proton site of the pyridine; 50 % deuteration of the *ortho* proton signal for pyridine was observed after 24 days. It could also be due to instability of the samples in alcohol solvents after longer time periods as the sample degrades. The enhancements for the non-polar solvents are now much larger than for the polar solvents. This relates to the slower activation of the catalyst in non-polar solvents and the fact that deuteration does not occur in benzene or CD<sub>2</sub>Cl<sub>2</sub>. Slower activation is thought to occur due to the fact that non-polar solvents such as benzene cannot bind and be involved in the coordination sphere of the catalyst to aid activation.

## 7. References

- (1) Harris, D. C., *J. Chem. Educ.* **1998**, *75*, 119-121.
- (2) Arduengo, A. J., *III. U.S. Patent 5077414* **1991**.
- (3) Occhipinti, G.; Jensen, V. R.; Törnroos, K. W.; Frøystein, N. Å.; Bjørsvik, H.-R., *Tetrahedron* **2009**, *65*, 7186-7194.
- (4) Cowley, M. J.; Adams, R. W.; Atkinson, K. D.; Cockett, M. C. R.; Duckett, S. B.; Green, G. G. R.; Lohman, J. A. B.; Kerssebaum, R.; Kilgour, D.; Mewis, R. E., *J. Am. Chem. Soc.* **2011**, *133*, 6134-6137.
